# Supplementary material for: SafeSpace: what is the feasibility and acceptability of a codesigned virtual reality intervention, incorporating compassionate mind training, to support people undergoing cancer treatment in a clinical setting?
Source: PubMed Central journal article supplement — BMJ Open. 2022 Feb 10;12(2):e047626. doi: 10.1136/bmjopen-2020-047626 (PMC8845220; doi:10.1136/bmjopen-2020-047626), 2022-02-10
Supplement: bmjopen-2020-047626.draft_revisions.pdf [file bmjopen-2020-047626.draft_revisions.pdf]

# BMJ Open

BMJ Open is committed to open peer review. As part of this commitment we make the peer review history of every article we publish publicly available.

When an article is published we post the peer reviewers' comments and the authors' responses online. We also post the versions of the paper that were used during peer review. These are the versions that the peer review comments apply to.

The versions of the paper that follow are the versions that were submitted during the peer review process. They are not the versions of record or the final published versions. They should not be cited or distributed as the published version of this manuscript.

BMJ Open is an open access journal and the full, final, typeset and author-corrected version of record of the manuscript is available on our site with no access controls, subscription charges or pay-per-view fees (<http://bmjopen.bmj.com>).

If you have any questions on BMJ Open's open peer review process please email [info.bmjopen@bmj.com](mailto:info.bmjopen@bmj.com)

# BMJ Open

## **SafeSpace: Co-design and evaluation of a unique virtual reality intervention, incorporating compassionate mind training, to support people undergoing cancer treatment.**

|                               |                                                                                                                                                                                                                                                                                                                                                                                                                                                                                                                                                                                                                                                                                                                                                                                                                   |
|-------------------------------|-------------------------------------------------------------------------------------------------------------------------------------------------------------------------------------------------------------------------------------------------------------------------------------------------------------------------------------------------------------------------------------------------------------------------------------------------------------------------------------------------------------------------------------------------------------------------------------------------------------------------------------------------------------------------------------------------------------------------------------------------------------------------------------------------------------------|
| Journal:                      | <i>BMJ Open</i>                                                                                                                                                                                                                                                                                                                                                                                                                                                                                                                                                                                                                                                                                                                                                                                                   |
| Manuscript ID                 | bmjopen-2020-047626                                                                                                                                                                                                                                                                                                                                                                                                                                                                                                                                                                                                                                                                                                                                                                                               |
| Article Type:                 | Original research                                                                                                                                                                                                                                                                                                                                                                                                                                                                                                                                                                                                                                                                                                                                                                                                 |
| Date Submitted by the Author: | 03-Dec-2020                                                                                                                                                                                                                                                                                                                                                                                                                                                                                                                                                                                                                                                                                                                                                                                                       |
| Complete List of Authors:     | O'Gara, Geraldine; Royal Marsden NHS Foundation Trust, Applied Health Research<br>Murray, Lisa; Portsmouth Hospitals NHS Trust, Department of Research and Innovation<br>Georgopoulou, Sofia; Royal Marsden Hospital NHS Trust, Applied Health Research<br>Anstiss, Tim; The Academy for Health Coaching<br>Macquarrie, Andrew; University College London, Department of Computer Science<br>Wheatstone, Pete; Royal Marsden NHS Foundation Trust, Patient and Public Representative<br>Bellman, Barbie; Royal Marsden NHS Foundation Trust, Patient and Public Representative<br>Gilbert, Paul; Derbyshire Healthcare NHS Foundation Trust, Mental Health Research Unit<br>Steed, Anthony; University College London, Department of Computer Science<br>Wiseman, Theresa; The Royal Marsden NHS Foundation Trust |
| Keywords:                     | QUALITATIVE RESEARCH, Adult oncology < ONCOLOGY, MENTAL HEALTH, COMPLEMENTARY MEDICINE                                                                                                                                                                                                                                                                                                                                                                                                                                                                                                                                                                                                                                                                                                                            |
|                               |                                                                                                                                                                                                                                                                                                                                                                                                                                                                                                                                                                                                                                                                                                                                                                                                                   |

SCHOLARONE™  
Manuscripts

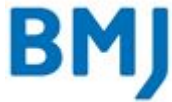

I, the Submitting Author has the right to grant and does grant on behalf of all authors of the Work (as defined in the below author licence), an exclusive licence and/or a non-exclusive licence for contributions from authors who are: i) UK Crown employees; ii) where BMJ has agreed a CC-BY licence shall apply, and/or iii) in accordance with the terms applicable for US Federal Government officers or employees acting as part of their official duties; on a worldwide, perpetual, irrevocable, royalty-free basis to BMJ Publishing Group Ltd ("BMJ") its licensees and where the relevant Journal is co-owned by BMJ to the co-owners of the Journal, to publish the Work in this journal and any other BMJ products and to exploit all rights, as set out in our [licence](#).

The Submitting Author accepts and understands that any supply made under these terms is made by BMJ to the Submitting Author unless you are acting as an employee on behalf of your employer or a postgraduate student of an affiliated institution which is paying any applicable article publishing charge ("APC") for Open Access articles. Where the Submitting Author wishes to make the Work available on an Open Access basis (and intends to pay the relevant APC), the terms of reuse of such Open Access shall be governed by a Creative Commons licence – details of these licences and which [Creative Commons](#) licence will apply to this Work are set out in our licence referred to above.

Other than as permitted in any relevant BMJ Author's Self Archiving Policies, I confirm this Work has not been accepted for publication elsewhere, is not being considered for publication elsewhere and does not duplicate material already published. I confirm all authors consent to publication of this Work and authorise the granting of this licence.

**Title Page**

**Title:** SafeSpace: Co-design and evaluation of a unique virtual reality intervention, incorporating compassionate mind training, to support people undergoing cancer treatment.

**Corresponding Author:**

Geraldine O’Gara  
Applied Health Research Team  
Royal Marsden NHS Foundation Trust  
Fulham Road  
London, UK  
SW3 6JJ  
[Geraldine.O’Gara@rmh.nhs.uk](mailto:Geraldine.O’Gara@rmh.nhs.uk)  
0208 915 4926

**Co Authors:**

Geraldine O’Gara  
Applied Health Research Team  
Royal Marsden NHS Foundation Trust  
London, UK

Lisa Murray  
Department of Research and Innovation  
Portsmouth Hospital NHS Trust  
Portsmouth PO6 3LY, UK

Dr Sofia Georgopoulou  
Applied Health Research Team  
Royal Marsden NHS Foundation Trust  
London, UK

Dr Tim Anstiss  
Founder  
Virtual Health Labs  
UK  
[Tim.Anstiss@virtualhealthlabs.org](mailto:Tim.Anstiss@virtualhealthlabs.org)

Dr Andrew Macquarrie  
Department of Computer Science  
University College London  
London, UK

Mr Pete Wheatstone  
Patient Public Representative  
Royal Marsden/ICR Biomedical Research Centre  
London, UK

Mrs Barbie Bellman

1  
2  
3 Patient Public Representative  
4 Royal Marsden NHS Foundation Trust  
5 London, UK  
6

7  
8 Professor Paul Gilbert  
9 Department of Clinical Psychology  
10 University of Derby  
11 Derby, UK  
12

13  
14 Professor Anthony Steed  
15 Department of Computer Science  
16 University College London  
17 London, UK  
18

19  
20 Professor Theresa Wiseman  
21 Applied Health Research Team  
22 Royal Marsden NHS Foundation Trust  
23 London, UK  
24

25 Word count: 4336  
26  
27  
28  
29  
30  
31  
32  
33  
34  
35  
36  
37  
38  
39  
40  
41  
42  
43  
44  
45  
46  
47  
48  
49  
50  
51  
52  
53  
54  
55  
56  
57  
58  
59  
60

For peer review only

## Article Summary

### Strengths and Limitations of this study

- First study in an oncology setting exploring use of VR to deliver a psychological support intervention.
- The SafeSpace intervention is novel, incorporating virtual reality and compassionate mind training to provide a low-cost and flexible resource to support people to relax, reduce their stress and cope with cancer treatments.
- An experience based co-design approach was used to develop and evaluate the intervention, working with people affected by cancer.
- Acceptability and feasibility were tested in the oncology setting. Within the evaluation phase, the potential impact of the intervention on psychological, physiological well-being and quality of life was assessed.
- Mixed-methods approach: qualitative techniques employed to capture experience of intervention use.
- The intervention consisted of three short sessions per participant. As compassionate mind training is relatively new and has had very limited use in cancer care, participants only received a small dose. This may have limited the overall effect of the intervention.
- This was an acceptability and feasibility project so sample size was small which limits the inferences that can be drawn from this study.

**Abstract:**

Objectives: The SafeSpace study co-designed and tested a virtual reality intervention, incorporating relaxation and compassionate mind-training to determine acceptability/feasibility in an oncology setting and evaluate impact on physical/psychological well-being and quality-of-life.

Design: A two-phase study. Phase 1 determined key characteristics using an Experienced-based Co-Design approach. Phase 2 evaluated the intervention using various measures and qualitative interviews. Descriptive statistics were used to analyse measures data and framework analysis was used to analyse interviews.

Setting: A specialist cancer centre in London, UK.

Participants: 18 in phase 1; 21 in phase 2. Participants were in cancer treatment, recovery or palliative care.

Primary and secondary outcome: Primary outcome was acceptability of the intervention, assessed by >60% uptake of three sessions. Secondary outcomes were impact on psychological well-being using: EQ-5D/QLQ-C30, Profile of Mood Scale (POMS), Warwick and Edinburgh Mental Well-being scale (WEMWBS), Depression and Anxiety Severity Scale 21 (DASS21), Self-Compassion Scale (SCS), Acceptance and Action Questionnaire (AAQII), and a locally developed questionnaire to capture self-compassion post-use. Physiological impact was assessed by change in heart rate (HR)/heart rate variability (HRV) and electrodermal activity (EDA).

Results: Twenty participants (mean age=48.7 years; SD=16.87); 65% (n=13) completed three sessions. Mental well-being improved following each use and from baseline to after session 3 (VR 1-  $z = 2.846$ ,  $p = < 0.01$ ; VR 2 -  $z = 2.501$ ,  $p = < 0.01$ ; VR 3 -  $z = 2.492$ ,  $p = < 0.01$ ). There was statistically significant difference in mean scores for EDA at mid- and post-session compared to pre-session ( $F(1.658, 4.973) = 13.364$ ,  $p < 0.05$ ). There was statistically significant reduction in stress levels from baseline to post-session 3. Participants found the intervention acceptable and highlighted areas for development.

Conclusion: The intervention is acceptable, and has shown positive effects on mental well-being/stress in the oncology setting. Larger studies are needed to confirm findings.

Word count: 300

**Background:**

The number of people living with cancer is expected to double to four million over the next 20 years. (1). Treatment involves surgery, radiotherapy, chemotherapy or other, alone or in combination. Many are unpleasant and lead to lack of compliance/adherence to recommended regimens (2). People affected by cancer (PABC) commonly experience poor psychological wellbeing and poor quality of life (QoL) (3, 4, 5). Some become isolated from friends/family, or are unable to continue working, causing financial difficulties and further isolation (2). At least one in four – around 500,000 people in the UK – face poor health or disability after treatment (1).

*Virtual Reality*

Healthcare has seen a growth in technology to provide support (6). Virtual reality (VR) in particular has been used in various applications including pain management, multiple sclerosis (7, 8, 9) and treatment of psychological conditions, such as phobias and anxiety (10, 11, 12). Within cancer care, VR has been used to manage pain, anxiety, and symptom distress. However, current literature regarding its effectiveness is equivocal. In a review of 19 studies (13), of those which reported on pain (n=6), half found that VR had a statistically significant positive effect in cancer patients. This was substantiated by other work (14) which reported decreased pain and state anxiety levels post-VR use by women with severe/chronic pain following breast cancer treatment. In contrast, a recent meta-analysis of cancer-related symptom management (15) showed the only statistically significant effect was reduced fatigue levels. Other studies (16, 17) reported positive results as a distraction technique during chemotherapy administration. These were small samples (n=16; n=20 respectively) of women with breast cancer. Subsequent studies of larger, more diverse cohorts reported significant impact on reducing perception of time when receiving chemotherapy, validating the distractive nature of VR (18, 19).

*Compassion Focused Therapy*

Compassion can be defined as ‘the sensitivity to suffering in self and others, with a deep commitment to try to relieve it’, and compassion-focused therapy (CFT) is an integrated, multimodal treatment approach that draws from sociology, psychology, and neuroscience (20). Central to CFT is compassionate mind-training (CMT), which helps people develop self-compassion (21). CFT and CMT have been shown to reduce suffering and improve QoL in a range of health problems such as anxiety/depression, eating disorders, phobias and pain management (22, 23, 24, 25) and are becoming more mainstream and acceptable (26, 27).

Whilst the application of VR within cancer is accepted, its use to deliver psychological therapies, such as CMT, remains unexplored. Little is known about how these treatment approaches might be combined, and whether there is any synergistic effect. The aim of this study was to co-design a low-cost VR intervention with PABC enabling rapid access to safe, calm and soothing environments accompanied by guided CMT exercises, and assess acceptability in the oncology setting.

**Methods:**

A pilot/proof of concept two-phased study using mixed-methods and an experience based co-design (EBCD) approach. EBCD is a method of participatory research that embeds experience of service



1  
2  
3 users and staff into service design (28). Phase 1: development of the intervention by co-designing  
4 and refining a number of continuously improved prototypes with PABC. Intervention delivery and  
5 evaluation model were also established. Phase 2: formal acceptability and evaluation of the  
6 intervention, with PABC, using the range of psychological, physiological, and QoL measures agreed in  
7 Phase 1.  
8  
9

#### 10 *Instruments for psychological assessment:*

11 Demographic data collected included age, gender, diagnosis, cancer group, cancer stage and aim of  
12 treatment.  
13  
14

#### 15 The POMS

16 The POMS (29) examines six mood subscales: tension-anxiety, depression, anger-hostility, vigour,  
17 fatigue, and confusion. Total mood disturbance score is computed by adding the five negative  
18 subscale scores and subtracting the vigour score. Higher total mood score indicate greater degree of  
19 mood disturbance (30). The POMS subscales and total score have demonstrated sound internal  
20 consistency reliability ( $\alpha \geq 0.84$ ) (31).  
21  
22  
23

#### 24 The WEMWBS

25 The WEMWBS (32) is a 14-item scale of mental well-being covering subjective well-being and  
26 psychological functioning. It is scored by summing responses to each item on a 1-5 Likert scale. The  
27 minimum scale score is 14; maximum is 70. It has been validated in the UK in ages 16+ (33). A non-  
28 validated, adapted version, AWEMWBS, was used immediately after each intervention use.  
29  
30  
31

#### 32 The AAQII

33 The AAQII is a seven-item measure of psychological inflexibility, or experiential avoidance. Items are  
34 scored on a Likert scale of 1 (never true) to 7 (always true) and are summed up. Higher scores equal  
35 greater levels of psychological inflexibility, with proven reliability and validity (34).  
36  
37  
38

#### 39 The SCS

40 The SCS (35) is a 26-item instrument that measures self-compassion through three hypothesized  
41 dimensions with their negative counterparts: self-kindness versus self-judgment, common humanity  
42 versus isolation, and mindfulness versus over-identification, according to a 5-point scale (1= Almost  
43 Never; 5= Almost Always). Subscale scores are computed by calculating the mean of subscale item  
44 responses. To compute the total score, the Self-Kindness, Common Humanity, and Mindfulness are  
45 summed with reverse scores of the Self-judgment, Isolation, and Over-identification subscales.  
46 Higher scores indicate greater self-compassion. In the original version, the total score showed  
47 excellent internal consistency ( $\alpha = .92$ ) and so did the six subscales (range: .75 - .81) (36).  
48  
49  
50

#### 51 The DASS21

52 The DASS 21 (37) is a 21-item instrument that assesses depression, anxiety and stress. Each seven-  
53 item scale has four responses ranging from 0 (did not apply to me at all) to 3 (applied to me  
54 much/most of the time). A higher score indicates higher levels of depression, anxiety and stress. The  
55 DASS-21 has excellent internal consistency (38), and construct validity (38, 39).  
56  
57  
58  
59  
60

### The EQ5D-3L

The EQ5D (40) is designed to measure generic health outcome and comprises two parts: the EQ5D-3L self-classifier, a self-reported description of health problems according to five dimensions (mobility, self-care, usual activities, pain/discomfort and anxiety/depression), and the EQ-VAS, a self-rated health status using a visual analogue scale to record perception of current overall health; the scale is graduated from 0 (the worst imaginable health state) to 100 (the best imaginable state). It has been shown to be reliable and valid in cancer populations (41).

### The QLQ-C30

The QLQ-C30 (42) is used to measure general aspects of HRQOL in cancer patients. EORTC QLQ-C30, Version 3, incorporates five functional scales on physical (PF), role (RF), cognitive (CF), emotional (EF) and social (SF) functioning, three symptom scales on fatigue (FA), pain (PA) and nausea and vomiting (NV), single items assessing dyspnoea (DY), insomnia (SL), loss of appetite (AP), constipation (CO) and diarrhoea (DI), one item assessing perceived financial impact (FI) and global health status/QoL scale (Global QoL). Each item is scored in one of four categories 1) 'Not at all', 2) 'A little', 3) 'Quite a bit' 4) 'Very much', with the exception of 'Global QoL'. It has been shown to be reliable and valid in cancer populations (43, 44, 45).

### Locally-developed questionnaire

The locally-developed questionnaire specifically targeted self-compassion after intervention use. It comprised 12 questions such as: 'To what extent did the virtual reality help you have insight into your current situation?' and 'To what extent did the virtual reality make you feel encouraged about the future?' Scored using a 7-item Likert scale ranging from not at all (1) to very much (7), the tool had excellent internal consistency ( $\alpha = 9.44$ ) (46); a higher score indicated that the intervention had a more positive impact.

### *Physiological assessment:*

Physiological assessment was made using heart rate (HR), heart rate variability (HRV) and electrodermal activity (EDA) (47).

### *Procedure:*

Potential participants were identified by clinical teams, and a diverse convenience sample undergoing a range of cancer treatments across tumour types from one specialist centre recruited. Inclusion criteria were: 1) having a diagnosis of cancer; 2) age over 18 years; 3) ability to provide written consent. Exclusion criteria were people: 1) considered too unwell; 2) in who use of VR is not recommended e.g. registered blind or known psychological disorder. Exclusion criteria were assessed by self-report or in consultation with clinical staff. All procedures were in accordance with the Declaration of Helsinki (1964) and later amendments or comparable ethical standards. Ethical approval was acquired from a UK Research Ethics Committee (South Central – Oxford B REC 18/SC/0346) and Health Research Authority (IRAS ID – 241770). Patient and Public involvement was sought for study design. Eligible participants received written information prior to giving consent.

### *Phase 1 - Intervention Development*

1  
2  
3 Five workshops, conducted over six months, were facilitated by a research team including experts in  
4 VR and CMT, using an EBCD approach. All were digitally recorded and, along with observations  
5 collected by two researchers, transcribed and analysed using thematic analysis.  
6  
7

8 *Initial design workshop* - Seven participants took part, which started with individuals telling their  
9 story, challenges along their pathway and what was important to include. Participants were able to  
10 try a range of equipment and experiences in a VR demonstration. They were encouraged to share,  
11 critique and propose ideas, using the design studio method (48). Analysis of data identified a  
12 number of 'touch points', these being what was emotionally most important to participants, which  
13 were used to inform the first iteration of the intervention.  
14  
15

16 *User-testing workshops* - Three user-testing workshops took place in which three/four participants  
17 each were invited to try the subsequently developed prototype; a total of 11 participants took part  
18 in one or more. Participants were asked about their experience particularly focusing on quality and  
19 content of the intervention. Further 'touch points' informed the design of the next iteration, which  
20 was refined until the co-design team were satisfied it had been developed to acceptable quality.  
21  
22

23 Findings from Phase 1:  
24

25  
26 Over the course of the user-testing workshops, the intervention became more refined and focused  
27 on detail within, such as recognition of what constitutes a 'safe space', voice quality (e.g.  
28 pace/tone), and guidance versus instruction. The key features underpinning design of the final  
29 specification included: 1) *being given permission to 'step out' of current situation*; 2) *importance of*  
30 *voice*; 3) *need for sign-posting/on-boarding information*; 4) *being able to explore*; 5) *being guided*  
31 *versus being instructed*. The final iteration consisted of three short sessions of VR/CMT, with CMT  
32 language developing progressively with each use, from simple, soothing rhythm breathing to a CMT  
33 self-compassion exercise. A choice of three environments was given; a beach as a 360-degree  
34 video, and animated mountain and forest scenes. Professional voiceover actors provided a choice of  
35 female or male audio. It was agreed that the intervention should be offered at any stage of  
36 treatment, and acknowledged that three sessions may not be sufficient to administer a meaningful  
37 'dose' of CMT, but would be enough to generate preliminary data.  
38  
39  
40  
41

42 *Evaluation workshop* - A final workshop was held with five participants, who had taken part in either  
43 design or testing, to establish an evaluation model. A range of demographic, psychological and  
44 physiological measures were reviewed and agreed to be collected at baseline, and pre- and post-  
45 each intervention use (see Table 1). The final intervention was delivered on a head-mounted, stand-  
46 alone device; this was considered inexpensive and practical.  
47  
48  
49  
50  
51  
52  
53  
54  
55  
56  
57  
58  
59  
60

Table 1: Schedule for study procedure

| Measure                                                     |                                        | Baseline                                                     | Pre each intervention | Post each intervention |
|-------------------------------------------------------------|----------------------------------------|--------------------------------------------------------------|-----------------------|------------------------|
| Name/age/gender/dx/tx etc                                   | Demographic information                | X                                                            |                       |                        |
| EQ-5D                                                       | HRQoL                                  | X                                                            | X                     |                        |
| QLQ C30                                                     | HRQoL                                  | X                                                            |                       | X                      |
| Action and Acceptance Questionnaire II - AAQII              | Psychological flexibility              | X                                                            |                       |                        |
| Depression, Anxiety and Stress Scale 21 – DASS21            | Anxiety/depression/stress              | X                                                            |                       | X                      |
| Profile of Mood State - POMS                                | Mood                                   | X                                                            | X                     | X                      |
| Warwick Edinburgh Mental Well-being Scale - WEMWBS          | Mental well-being                      | X                                                            | X                     |                        |
| Self-compassion Scale - SCS                                 | Self-compassion                        | X                                                            |                       | X                      |
| Adapted Warwick Edinburgh Mental Well-being Scale - AWEMWBS | Mental well-being immediate time-point |                                                              |                       | X                      |
| Locally developed questionnaire                             | Self-compassion                        |                                                              |                       | X                      |
| Heart rate/heart rate variation/electrodermal activity      | Physiological                          | Monitored continuously before, during and after intervention |                       |                        |

### Phase 2 – Evaluation/acceptability of intervention

The final intervention was evaluated and tested for acceptability. A further twenty-one people were recruited. Four study visits were organised, coinciding with planned appointments, spaced at least a week apart. At initial visit, written consent was obtained and demographic data collected. Participants completed the baseline set of questionnaires relating to psychological state and QoL. The study then proceeded as per table 1. Telephone interviews were conducted once the participant had completed intervention use.

### Results:

#### Quantitative

Summary measures for participant characteristics, VR use data variables and questionnaire scores were presented as means and standard deviations for continuous (approximate) normally distributed variables and frequencies and percentages for categorical variables. Shapiro-Wilk test was used to confirm normal distribution of continuous summary scales (all p values >0.05). Friedman's test for repeated measures was performed to assess there was a statistically significant difference in scores between baseline, VR1, VR2 and VR3. Wilcoxon signed ranks test was used to

compare baseline and VR3 session scores. ANOVA were performed to assess changes in EDA, HR and HRV within each session. All p values were two-sided throughout; significance was set at the 5% level. IBM SPSS version 25 was used to analyse the data. Missing data was addressed, see suppl Table 1.

### *Participants*

Seven males and 14 females consented to take part. One participant was subsequently lost to follow-up. Mean age was 48.7 years (SD=16.87; range: 22-77). Mean time elapsed since diagnosis was 37.08 months (SD= 45.00; range: 2-149). 16 participants (80%) were in active treatment. They had various tumour types with gynaecological cancer being most common (N=4; 20%) (See table 2).

**Table 2: Tumour type**

| Tumour Type        | N | %  |
|--------------------|---|----|
| Lower GI           | 2 | 10 |
| Haematological     | 1 | 5  |
| Gynaecological     | 4 | 20 |
| Head and Neck      | 3 | 15 |
| Breast             | 3 | 15 |
| Genitourinary (GU) | 3 | 15 |
| Other              | 4 | 20 |

### *Acceptability/Feasibility Data*

In total, 49 sessions of VR were delivered and completed. Acceptability of the intervention was deemed satisfactory as > 60% (N=13; 65%) of participants completed all three sessions. Reasons for not completing included: insufficient time within duration of the study, deterioration in clinical condition leading to changes in treatment, or transfer of care. There were 12 occasions (24% of total number of sessions delivered) when participants experienced a problem e.g. with equipment (see Table 3).

Table 3: Acceptability and feasibility data

|                                                                        | VR1   |     | VR2   |      | VR3   |     |
|------------------------------------------------------------------------|-------|-----|-------|------|-------|-----|
|                                                                        | n     | %   | n     | %    | n     | %   |
| <b>No. that took part in VR:</b>                                       | 20    | 100 | 16    | 80   | 13    | 65  |
| <b>No. that did not take part in VR:</b>                               |       |     | 4     | 20   | 7     | 35  |
| <b>Reasons for not completing VR:</b>                                  |       |     |       |      |       |     |
| Insufficient time                                                      |       |     | 1     | 25   | 3     | 43  |
| Deterioration in condition                                             |       |     |       |      | 1     | 14  |
| Discontinuation of treatment at site                                   |       |     | 1     | 25   | 1     | 14  |
| Adverse effect from VR                                                 |       |     |       |      | 1     | 14  |
| Unknown                                                                |       |     | 2     | 50   | 1     | 14  |
| <b>Voice:</b>                                                          |       |     |       |      |       |     |
| Male                                                                   | 12    | 60  | 8     | 50   | 6     | 46  |
| Female                                                                 | 8     | 40  | 8     | 50   | 7     | 54  |
| <b>Chosen VR environment:</b>                                          |       |     |       |      |       |     |
| Beach                                                                  | 12    | 60  | 5     | 31   | 8     | 61  |
| Mountain                                                               | 6     | 30  | 8     | 50   | 5     | 39  |
| Forest                                                                 | 2     | 10  | 3     | 19   | 0     | 0   |
| <b>Private room:</b>                                                   |       |     |       |      |       |     |
| Yes                                                                    | 11    | 55  | 9     | 56   | 8     | 61  |
| No                                                                     | 9     | 45  | 7     | 44   | 5     | 39  |
| <b>Did the participant change the environment whilst using VR?</b>     |       |     |       |      |       |     |
| Yes                                                                    | 2     | 10  | 0     | 0    | 1     | 8   |
| No                                                                     | 18    | 90  | 16    | 100  | 12    | 92  |
| <b>Did the participant experience external noise?</b>                  |       |     |       |      |       |     |
| Yes                                                                    | 9     | 45  | 6     | 37.5 | 5     | 38  |
| No                                                                     | 11    | 55  | 10    | 62.5 | 8     | 62  |
| <b>Total time in VR (minutes):</b>                                     |       |     |       |      |       |     |
| Mean                                                                   | 10.8  |     | 10.44 |      | 10.00 |     |
| SD                                                                     | 1.852 |     | 2.502 |      | 1.633 |     |
| Range                                                                  | 7-15  |     | 7-16  |      | 8-14  |     |
| <b>Did the participant experience any problems with the equipment?</b> |       |     |       |      |       |     |
| No                                                                     | 12    |     | 13    |      | 12    |     |
| Yes:                                                                   | 8     |     | 3     |      | 1     |     |
| Minor                                                                  | 5     |     | 0     |      | 1     |     |
| Additional intervention                                                | 2     |     | 3     |      | 0     |     |
| Unresolvable                                                           | 1     |     | 0     |      | 0     |     |
| <b>Did the participant experience an adverse event?</b>                |       |     |       |      |       |     |
| Yes                                                                    | 1     | 5   | 2     | 12.5 | 0     | 0   |
| No                                                                     | 19    | 95  | 14    | 87.5 | 13    | 100 |

### Adverse Events

Three minor adverse events (AE) were recorded by two participants who experienced mild nausea and dizziness whilst using the intervention. In both, this resolved spontaneously. The third was in one of the same participants but occurred 48 hours after completing VR2. They reported nausea and

dizziness for 48 hours resolving with bed-rest. In light of this, they were advised not to undergo the third session.

## **Descriptive Statistics**

Descriptive statistics were computed for all questionnaire scores within respective domains and are presented as frequencies and standard deviations (See Suppl. Table 2). Friedman and Wilcoxon signed ranks tests were performed to compare potential changes in variables between baseline and VR1, VR2 and VR3 sessions. Missing data for each variable is shown in Suppl. table 3.

### *Multi-variate Analyses*

#### *Quality of Life*

There were no statistically significant changes in QoL in either the EQ5D-3L or the QLQ-C30 responses (see Suppl. Table 4).

#### *Psychological Measures*

Total mood scores (POMS) were compared pre- and post-intervention. There was a statistically significant increase in total scores after the first session (VR 1) ( $z = -2.136$ ,  $p = 0.03$ ) suggesting there was an improvement in mood. There was improvement in scores post-second session (VR2) but this was not statistically significant (see Suppl. Table 5). Mental well-being (WEMWBS) scores showed statistically significant changes to mental well-being from pre- to post-VR session (VR 1  $z = -2.846$ ,  $p < 0.01$ ; VR 2  $z = -2.501$ ,  $p < 0.01$ ; VR 3  $z = -2.492$ ,  $p < 0.01$ ). There was a consistent beneficial effect maintained throughout all sessions and a statistically significant increase in WEMWBS scores from baseline to VR 3 ( $\chi^2 = 12.905$ ,  $df = 3$ ,  $p = 0.005$ ) (see Suppl. Table 4 & 5).

There was a statistically significant reduction in stress levels as measured by the DASS21 from baseline to post-session 3 ( $z = -2.138$ ,  $p = 0.03$ ) (see Suppl. Table 5). While there was a positive and beneficial trend observed from baseline to post-session 3 (VR3) for DASS21 sub-scores for depression and anxiety, psychological flexibility (AAQII), self-compassion sub-domains self-kindness, self-judgement, and isolation and over-identification, as well as the locally developed questionnaire scores, none reached statistical significance (see Suppl. Tables 4 & 5).

#### Physiological measures

ANOVA were conducted to compare EDA, HR and HRV within each session. A decrease in mean EDA for each of the three sessions was recorded, dropping from pre-intervention level and maintained following removal of headset; this was significant for the first session. Using ANOVA with repeated measures and a Greenhouse-Geisser correction, mean scores for EDA were statistically significantly different at mid- and post-session compared to pre-session levels ( $F(1.658, 4.973) = 13.364$ ,  $p < 0.05$ ). Similarly, the only statistically significant change in HR was in the second session with a decrease from pre- to mid-session followed by a return to pre-session levels at post-session ( $F(1.424, 4.271) = 13.364$ ,  $p < 0.05$ ) (see Suppl. Tables 5a & 5b). No change was observed in HRV.

#### *Qualitative*

1  
2  
3 Participants were invited to participate in a short semi-structured telephone interview to acquire a  
4 deeper understanding of their experience of use; 11 consented to take part. Interviews were audio-  
5 recorded and transcribed. Feedback was also given following each individual use of the  
6 intervention; this was summarised and recorded manually by the researcher and analysed alongside  
7 interview data using framework analysis (49). The framework was informed by analysis of the first  
8 two transcripts which were coded independently by three researchers and themes discussed and  
9 agreed. The subsequent interview transcripts and participant comments were analysed using the  
10 agreed framework. Three themes emerged: 1) *Practical issues*; 2) *Immersion*; 3) *Impact of*  
11 *intervention*.

#### 12 *Practical Issues:*

13  
14  
15 Participants reported equipment as comfortable and relatively straightforward to use. Clear  
16 guidance was considered important, and a designated room suggested for the future.

17  
18  
19 *'...putting the headset on isn't really a problem ... we're all going to have to get used to some*  
20 *kind of virtual reality at some point ... hadn't tried it before but it was very interesting.'* 012

21  
22  
23 The importance of tailoring to the individual was highlighted:

24  
25  
26 *'I find breathing exercises really frustrating ... I have tumours in my lungs, the amount I can*  
27 *inhale, the amount of time I can hold for is less than for other people. So someone will say*  
28 *hold it this many beeps and then you can't . . . you feel like you failed at it and you check out*  
29 *...'* 019

#### 30 *Immersion:*

31  
32  
33 This relates to quality of VR imagery, ability to explore, and impact of voices used in the audio. Lack  
34 of quality was seen as negatively impacting immersion and improvement suggested for the future  
35 with a preference for 'real' environments rather than animated:

36  
37  
38 *'The beach was definitely more...realistic, you felt more sort of immersed in . . . compared*  
39 *with the other two.'* 026

40  
41  
42 Whilst there was positive reaction to the professional voices, some participants described becoming  
43 disengaged:

44  
45  
46 *'...I had the final session with the lady [voice], and she was excellent . . . it was very*  
47 *believable. She really did explain it, she was really part of it, and all that. Whereas, I felt*  
48 *with him [male voice], more like that he was reading a script.'* 027

49  
50  
51 Not all participants liked the compassion therapy aspect of the intervention:

52  
53  
54 *'... the compassionate mind therapy, I couldn't see the point of at all . . . you are in a*  
55 *compassion rich environment with the Nurses, the Doctors, friends and family. And the last*  
56 *thing you, sort of, need is another dose of compassion . . .'* 027

57  
58  
59 There was mixed reaction to external noise; some found it detracted from the quality of experience  
60 but others found it reassuring as it gave awareness of what was going on around them:



1  
2  
3 *'...the noise cancelling was pretty good but I did still hear, if I focused properly, the pump*  
4 *beeping if something went wrong . . . it was sort of the right balance between not being*  
5 *completely disconnected if something happened. I think, anymore and I would have felt too*  
6 *isolated.'* 026  
7  
8

9 *Impact of intervention:*

10  
11 The intervention was seen as having immediate and lasting effects, with some recognising the ability  
12 to replicate the 'safe space' for themselves:  
13

14 *'The breathing techniques, I started to employ when I was having a scan even though the*  
15 *scan was very short. I thought that was quite useful for that. I hadn't really thought of that*  
16 *before but I found it actually quite calming.'* 017  
17  
18

19 For others, the impact was short-lived but still considered useful:

20  
21 *'I don't think it will have a lasting impact...It definitely made the rest of the day easier . . . .*  
22 *But the next day, the day after, I didn't still have that same sense of calm, it was just kind of*  
23 *immediately after...'* 019  
24  
25

26 Participants' past experience of non-medical support measures emerged as relevant to  
27 receptiveness and engagement with the overall VR/CMT experience:  
28

29 *'But I've also been on some of these yoga type things where you just try and relax and get*  
30 *into the mood and all that kind of thing. And I thought it was quite useful for that. You*  
31 *know, the talking was the same.'* 012  
32  
33

34 Participants also gave valuable feedback regarding the research process and informing a larger  
35 study, with particular reference to burden of questionnaires:  
36

37 *'I think some of them were a little bit repetitive, I though the one with all the options about*  
38 *being angry, sad, that one went on for ages. I don't think that really needs to be that long.'*  
39 *017*  
40  
41  
42  
43  
44  
45  
46  
47  
48  
49  
50  
51  
52  
53  
54  
55  
56  
57  
58  
59  
60

1  
2  
3 Discussion:

4  
5 The aim of the study was to co-design a low-cost VR intervention enabling rapid access to safe, calm  
6 and soothing environments accompanied by quality-controlled and guided CMT exercises, and  
7 assess acceptability/feasibility in an oncology setting. The intervention was found to be acceptable  
8 with nearly two-thirds of participants completing three sessions, meeting the defined end-point.  
9 This was supported by findings from interview data, confirming participants were positive, and  
10 supporting need for such interventions to help PABC deal with the psychological impact of cancer  
11 /treatment, and consistent with wider literature in which new technologies were found to be  
12 favourable regardless of age, background or gender (16, 50). Also consistent, it was found to be  
13 acceptable and safe to use across a number of settings including inpatient, outpatient and day-care  
14 (16, 17, 18, 50, 51, 52).

15  
16  
17  
18 The final version of the intervention consisted of three short, separate sessions of VR/CMT. It is  
19 difficult to determine whether VR or CMT had more effect as arguably patients only received a  
20 relatively small dose of CMT. This was substantiated in interview findings which highlighted that  
21 most participants were unaware of any progression and/or did not relate to the CMT exercises.  
22 Participants thought the intervention should be longer, and incorporate more sessions, to have  
23 lasting effect. Other research in people having chemotherapy (19) argues that VR may not be  
24 effective for all as those with greater symptom distress had more accurate perception of time,  
25 suggesting they were not able to block out negative external cues. In order to effect significant  
26 change on individual levels of self-compassion, more and longer sessions may be required (53). A  
27 future multi-arm RCT may explore which aspect (VR/CMT/ both) has most, if any, effect.  
28  
29  
30  
31

32 Throughout both phases, participants expressed that they liked being able to step out of their  
33 situation and into a 'safe space', and some positively described re-imagining the VR environment  
34 when they felt stressed. This happened quickly; for some, it was after the first session. Consistent  
35 with other work (18, 19), participants reported time passed quickly whilst using the intervention  
36 suggesting distractive qualities which may be helpful during lengthy or perceived unpleasant  
37 procedures. Presence causes the user to suspend disbelief and believe they are in the virtual  
38 environment, reacting as if they are in the real world (54). This varied between participants, as the  
39 quality of imagery and content of audio were reported by some as detracting from the immersive  
40 experience. It is generally acknowledged that presence is dependent on either the characteristics of  
41 the user and the media employed (55), and relates to willingness to suspend disbelief. Our findings  
42 support this; those who had engaged with psychological therapies previously reported they were  
43 less concerned with the quality of imagery. Arguably, this study engaged a convenience sample who  
44 may have been more willing. Moving forward, using tools to evaluate the degree of presence and  
45 perhaps time perception may be valuable.  
46  
47  
48  
49  
50

51 A key challenge is identifying who might benefit most from VR, alongside who is not appropriate, to  
52 ensure safety. Research (16, 17, 18) has highlighted benefits in chemotherapy populations in  
53 particular, with reduction of fatigue, anxiety, symptom distress and perception of time. Contrary to  
54 this, in our study both participants who experienced AEs were undergoing chemotherapy. However,  
55 effects were mild and could not definitively be attributed to the intervention. For one, the effect was  
56 so mild that it was not mentioned at the time, and the other was disappointed not to continue,  
57  
58  
59  
60

1  
2  
3 seeing the benefit of the VR experience outweighing effect of the AE. Clinical guidance surrounding  
4 patient monitoring during use is recommended.  
5

6 Interesting findings in terms of *secondary* aims emerged; in particular, improvements in mental well-  
7 being and stress. Surprisingly, and consistent with other research (56) we did not see a statistically  
8 significant reduction in anxiety levels as reported in other VR studies in this setting (14, 17). This  
9 could be due to use of different measures. Standardisation may help to make future findings more  
10 generalisable/comparable.  
11  
12

13  
14 A strength is the mixed-methods approach: qualitative techniques were employed to capture  
15 experience of intervention use. The majority of studies use tools to capture symptom change (14,  
16 19, 51) with only one (57) using open-ended questions in their methodology. Further commonalities  
17 included issues surrounding appropriate usage space, and the negative effect of external noise.  
18 Developing the intervention for home use may improve quality and impact of experience. The  
19 sample size was small (n=21), but deemed appropriate by the EBCD group and local statisticians to  
20 assess acceptability, and included a diverse mix of demographics, tumour/treatment type. It is  
21 acknowledged that a larger sample would be needed moving forward. Even though the EBCD group  
22 designed the evaluation and chose measures, interview data highlighted that the quantity were  
23 burdensome and repetitive. Consequently, participants described being unable to give full attention  
24 and findings may not be a true reflection of feelings. Two non-validated tools were used to capture  
25 mental wellbeing and participant self-compassion, and as such may lack consistency and sensitivity.  
26  
27  
28  
29

### 30 **8. Conclusion**

31  
32 A VR/CMT intervention is acceptable to PABC, and is recognized as offering a novel approach to  
33 addressing unmet psychological needs at various stages of the cancer pathway. Whilst feasible/safe  
34 to deliver in the oncology setting, developing a flexible approach in which users can access the  
35 intervention independently e.g. in their own homes, may increase uptake/impact and allow more  
36 autonomy.  
37  
38

39 Future research should focus on conducting larger scale RCT's in which length or frequency of VR  
40 and amount of CMT given would be increased, alongside a bigger sample and a control to increase  
41 generalizability of findings. Careful consideration is required when selecting evaluative measures.  
42  
43

44 Author contributions: All authors contributed to either study concept/design, data acquisition,  
45 analysis or interpretation; manuscript draft and revision for important intellectual data; and  
46 approved the final version.  
47

48 Acknowledgement: This work was funded by Macmillan Cancer Support grant number 6488094.  
49

50  
51 Conflict of interests: None declared.  
52  
53  
54  
55  
56  
57  
58  
59  
60

## References

1. Maddams J, Brewster D, Gavin A, Steward J, Elliott J, Utlely M, Møller H. Cancer prevalence in the United Kingdom: estimates for 2008. *British journal of cancer*. 2009 Aug;101(3):541-7.
2. Macmillan (2013) *Throwing light on the consequences of cancer*. [Online] Available at: <https://www.macmillan.org.uk/documents/aboutus/research/researchandevaluationreport/s/throwinglightontheconsequencesofcanceranditstreatment.pdf>. Accessed Sept 2018
3. Linden W, Vodermaier A, MacKenzie R, Greig D. Anxiety and depression after cancer diagnosis: prevalence rates by cancer type, gender, and age. *Journal of affective disorders*. 2012 Dec 10;141(2-3):343-51.
4. Zajacova A, Dowd JB, Schoeni RF, Wallace RB. Employment and income losses among cancer survivors: estimates from a national longitudinal survey of American families. *Cancer*. 2015 Dec 15;121(24):4425-32.
5. Bours MJ, van der Linden BW, Winkels RM, van Duijnhoven FJ, Mols F, van Roekel EH, Kampman E, Beijer S, Weijenberg MP. Candidate predictors of health-related quality of life of colorectal cancer survivors: a systematic review. *The oncologist*. 2016 Apr;21(4):433.
6. Pearce, C. and Haikerwal, M.C., 2010. E-health in Australia: time to plunge into the 21st century. *Medical Journal of Australia*, 193(7), pp.397-398.
7. Malloy KM, Milling LS. The effectiveness of virtual reality distraction for pain reduction: a systematic review. *Clinical psychology review*. 2010 Dec 1;30(8):1011-8.
8. Massetti T, Trevizan IL, Arab C, Favero FM, Ribeiro-Papa DC, de Mello Monteiro CB. Virtual reality in multiple sclerosis—a systematic review. *Multiple sclerosis and related disorders*. 2016 Jul 1;8:107-12.
9. Indovina P, Barone D, Gallo L, Chirico A, De Pietro G, Giordano A. Virtual reality as a distraction intervention to relieve pain and distress during medical procedures. *The Clinical journal of pain*. 2018 Sep 1;34(9):858-77.
10. Rothbaum BO, Hodges LF, Kooper R, Opdyke D, Williford JS, North M. Virtual reality graded exposure in the treatment of acrophobia: A case report. *Behavior therapy*. 1995 Jun 1;26(3):547-54.
11. Rothbaum BO, Hodges L, Smith S, Lee JH, Price L. A controlled study of virtual reality exposure therapy for the fear of flying. *Journal of consulting and Clinical Psychology*. 2000 Dec;68(6):1020.
12. Michaliszyn D, Marchand A, Bouchard S, Martel MO, Poirier-Bisson J. A randomized, controlled clinical trial of in virtuo and in vivo exposure for spider phobia. *Cyberpsychology, Behavior, and Social Networking*. 2010 Dec 1;13(6):689-95.
13. Chirico A, Lucidi F, De Laurentiis M, Milanese C, Napoli A, Giordano A. Virtual reality in health system: beyond entertainment. a mini-review on the efficacy of VR during cancer treatment. *Journal of cellular physiology*. 2016 Feb;231(2):275-87.

14. Mohammad EB, Ahmad M. Virtual reality as a distraction technique for pain and anxiety among patients with breast cancer: A randomized control trial. *Palliative & supportive care*. 2019 Feb;17(1):29-34.
15. Zeng Y, Zhang JE, Cheng AS, Cheng H, Wefel JS. Meta-analysis of the efficacy of virtual reality-based interventions in cancer-related symptom management. *Integrative cancer therapies*. 2019 Aug;18:1534735419871108.
16. Schneider SM, Ellis M, Coombs WT, Shonkwiler EL, Folsom LC. Virtual reality intervention for older women with breast cancer. *CyberPsychology & Behavior*. 2003 Jun 1;6(3):301-7.
17. Schneider SM, Prince-Paul M, Allen MJ, Silverman P, Talaba D. Virtual reality as a distraction intervention for women receiving chemotherapy. In *Oncology nursing forum* 2004 Jan 1 (Vol. 31, No. 1).
18. Schneider SM, Hood LE. Virtual reality: a distraction intervention for chemotherapy. In *Oncology nursing forum* 2007 Jan (Vol. 34, No. 1, p. 39). NIH Public Access.
19. Schneider SM, Kisby CK, Flint EP. Effect of virtual reality on time perception in patients receiving chemotherapy. *Supportive Care in Cancer*. 2011 Apr 1;19(4):555-64.
20. Gilbert P. An introduction to compassion focused therapy in cognitive behavior therapy. *International Journal of Cognitive Therapy*. 2010 Jun;3(2):97-112.
21. Gilbert P. Introducing compassion-focused therapy. *Advances in psychiatric treatment*. 2009 May;15(3):199-208.
22. Judge L, Cleghorn A, McEwan K, Gilbert P. An exploration of group-based compassion focused therapy for a heterogeneous range of clients presenting to a community mental health team. *International Journal of Cognitive Therapy*. 2012 Dec;5(4):420-9.
23. Leaviss J, Uttley L. Psychotherapeutic benefits of compassion-focused therapy: An early systematic review. *Psychological medicine*. 2015 Apr;45(5):927-45.
24. Anstiss T, Passmore J, Gilbert P. Compassion: the essential orientation. *Psychologist*. 2020 May 1;33:38-42.
25. Gooding H, Stedmon J, Crix D. 'All these things don't take the pain away but they do help you to accept it': making the case for compassion-focused therapy in the management of persistent pain. *British Journal of Pain*. 2020 Feb;14(1):31-41.
26. Neff KD, Germer CK. A pilot study and randomized controlled trial of the mindful self-compassion program. *Journal of clinical psychology*. 2013 Jan;69(1):28-44.
27. Kirby JN. Compassion interventions: The programmes, the evidence, and implications for research and practice. *Psychology and Psychotherapy: Theory, Research and Practice*. 2017 Sep;90(3):432-55.

28. Weston C, Soanes L, Chisholm J, Wiseman T. 'Out There': Developing a transition pathway for adolescents and young adults with cancer using Experience-Based Co-Design. *The Journal of Health Design*. 2018 Mar 22;3(1).
29. McNair DM, Lorr M, Droppleman LF. Manual for the profile of mood states (POMS). San Diego: Educational and Industrial Testing Service. 1971.
30. Biehl B, Landauer A. *Das Profile of Mood States (POMS)* Mannheim: 1975
31. Wyrwich, K.W. and Yu, H., 2011. Validation of POMS questionnaire in postmenopausal women. *Quality of Life Research*, 20(7), pp.1111-1121.
32. Tennant R, Hiller L, Fishwick R, Platt S, Joseph S, Weich S, Parkinson J, Secker J, Stewart-Brown S. The Warwick-Edinburgh mental well-being scale (WEMWBS): development and UK validation. *Health and Quality of life Outcomes*. 2007 Dec;5(1):63.
33. Stewart-Brown S, Janmohamed K. Warwick-Edinburgh mental well-being scale. User guide. Version. 2008 Jun;1.
34. Bond FW, Hayes SC, Baer RA, Carpenter KM, Guenole N, Orcutt HK, Waltz T, Zettle RD. Preliminary psychometric properties of the Acceptance and Action Questionnaire-II: A revised measure of psychological inflexibility and experiential avoidance. *Behavior therapy*. 2011 Dec 1;42(4):676-88.
35. Neff KD. The development and validation of a scale to measure self-compassion. *Self and identity*. 2003 Jul 1;2(3):223-50.
36. Cunha M, Xavier A, Castilho P. Understanding self-compassion in adolescents: Validation study of the Self-Compassion Scale. *Personality and Individual Differences*. 2016 Apr 1;93:56-62.
37. Lovibond SH, Lovibond PF. Manual for the depression anxiety stress scales. Sydney: Psychology Foundation; 1995.
38. Henry JD, Crawford JR. The short-form version of the Depression Anxiety Stress Scales (DASS-21): Construct validity and normative data in a large non-clinical sample. *British journal of clinical psychology*. 2005 Jun;44(2):227-39.
39. Page AC, Hooke GR, Morrison DL. Psychometric properties of the Depression Anxiety Stress Scales (DASS) in depressed clinical samples. *British Journal of Clinical Psychology*. 2007 Sep;46(3):283-97.
40. The EuroQol Group (1990) EuroQol – a new facility for the measurement of health-related quality of life. *Health Policy* 16:199–208
41. Kim et al. *Health and Quality of Life Outcomes* (2015) 13:203
42. Aaronson NK, Ahmedzai S, Bergman B, Bullinger M, Cull A, Duez NJ, Filiberti A, Flechtner H, Fleishman SB, de Haes JC, Kaasa S. The European Organization for Research and Treatment of Cancer QLQ-C30: a quality-of-life instrument for use in international clinical trials in oncology. *JNCI: Journal of the National Cancer Institute*. 1993 Mar 3;85(5):365-76.
43. Apolone G, Filiberti A, Cifani S, Ruggiata R, Mosconi P. Evaluation of the EORTC QLQ-C30 questionnaire: a comparison with SF-36 Health Survey in a cohort of Italian long-survival cancer patients. *Annals of Oncology*. 1998 May 1;9(5):549-57.
44. Kobayashi K, Takeda F, Teramukai S, Gotoh I, Sakai H, Yoneda S, Noguchi Y, Ogasawara H, Yoshida K. A cross-validation of the European Organization for Research and Treatment of

- 1  
2  
3 Cancer QLQ-C30 (EORTC QLQ-C30) for Japanese with lung cancer. *European Journal of*  
4 *Cancer*. 1998 May 1;34(6):810-5.  
5  
6 45. Arraras JI, Arias F, Tejedor M, Pruja E, Marcos M, Martínez E, Valerdi J. The EORTC QLQ-C30  
7 (version 3.0) quality of life questionnaire: validation study for Spain with head and neck  
8 cancer patients. *Psycho-Oncology: Journal of the Psychological, Social and Behavioral*  
9 *Dimensions of Cancer*. 2002 May;11(3):249-56.  
10  
11 46. Cronbach LJ. Coefficient alpha and the internal structure of tests. *psychometrika*. 1951 Sep  
12 1;16(3):297-334.  
13  
14 47. Dawson ME, Schell AM, Filion DL. The electrodermal system.  
15  
16 48. Edenspeikermann, 2016. The Design Studio Method. [Online] Available at:  
17 <http://www.edenspeikermann.com/insights/working-with-design-studios/>. Accessed 10  
18 Sept 2019  
19  
20 49. Ritchie J and Spencer L (1994) Qualitative data analysis for applied policy research. *Analyzing*  
21 *Qualitative Data*. Edited by: Bryman A, Burgess RG. London: Routledge.  
22  
23 50. Baños RM, Etchemendy E, Castilla D, García-Palacios A, Quero S, Botella C. Positive mood  
24 induction procedures for virtual environments designed for elderly people. *Interacting with*  
25 *Computers*. 2012 May 1;24(3):131-8.  
26  
27 51. Espinoza M, Baños RM, García-Palacios A, Cervera JM, Esquerdo G, Barraón E, Botella C.  
28 Promotion of emotional wellbeing in oncology inpatients using VR.  
29  
30 52. Niki K, Okamoto Y, Maeda I, Mori I, Ishii R, Matsuda Y, Takagi T, Uejima E. A novel palliative  
31 care approach using virtual reality for improving various symptoms of terminal cancer  
32 patients: A preliminary prospective, multicenter study. *Journal of palliative medicine*. 2019  
33 Jun 1;22(6):702-7.  
34  
35 53. Neff KD, Dahm KA. Self-compassion: What it is, what it does, and how it relates to  
36 mindfulness. In *Handbook of mindfulness and self-regulation 2015* (pp. 121-137). Springer,  
37 New York, NY.  
38  
39 54. Rogers S. Why is presence important for virtual reality? Online. Available at:  
40 <https://www.vrfocus.com/2017/11/why-is-presence-important-for-virtual-reality/> Accessed  
41 November 2019.  
42  
43 55. Lombard M, Ditton T. At the heart of it all: The concept of presence. *Journal of computer-*  
44 *mediated communication*. 1997 Sep 1;3(2):JCMC321.  
45  
46 56. Glennon C, McElroy SF, Connelly LM, Lawson LM, Bretches AM, Gard AR, Newcomer LR. Use  
47 of Virtual Reality to Distract From Pain and Anxiety. In *Oncology nursing forum 2018* Jul 1  
48 (Vol. 45, No. 4).  
49  
50 57. Baños RM, Espinoza M, García-Palacios A, Cervera JM, Esquerdo G, Barraón E, Botella C. A  
51 positive psychological intervention using virtual reality for patients with advanced cancer in  
52 a hospital setting: a pilot study to assess feasibility. *Supportive Care in Cancer*. 2013 Jan  
53 1;21(1):263-70.  
54  
55  
56  
57  
58  
59  
60

## Appendix

## Supplementary tables

Supplementary Table 1: Missing data management

| Questionnaire       | Variable measured                      | Missing Data                                                             | Statistical test            |
|---------------------|----------------------------------------|--------------------------------------------------------------------------|-----------------------------|
| EQ-5D – 3D          | QoL                                    | No computation if values missing as single scores                        |                             |
| QLQ-C30             | QoL                                    | Values computed if < or = 10% data missing. Calculated mean for subscore |                             |
| DASS-21             | Depression, Anxiety, Stress            |                                                                          | Friedman (missing listwise) |
| AAQ II              | Psychological flexibility              |                                                                          | Friedman (missing listwise) |
| POMs                | Mood state                             |                                                                          | Friedman (missing listwise) |
| SCS                 | Self-compassion                        |                                                                          | Friedman (missing listwise) |
| WEBWBS/Ad<br>WEMWBS | Mental well-being                      |                                                                          | Friedman (missing listwise) |
| Locally developed Q | Self-compassion after intervention use |                                                                          | Friedman (missing listwise) |



**Supplementary Table 2: Descriptive Statistics Questionnaire Domain Scores**

| QUESTIONNAIRES & DOMAINS                       | N  | Mean   | Std. Dev. | Min    | Max    |
|------------------------------------------------|----|--------|-----------|--------|--------|
| <b>EQ-5D-5L</b>                                |    |        |           |        |        |
| <b>MOBILITY</b>                                |    |        |           |        |        |
| B_EQ5DM                                        | 12 | 1.33   | .49       | 1      | 2      |
| VR1_EQ5DM                                      | 12 | 1.33   | .49       | 1      | 2      |
| VR2_EQ5DM                                      | 12 | 1.33   | .49       | 1      | 2      |
| VR3_EQ5DM                                      | 12 | 1.33   | .49       | 1      | 2      |
| <b>SELF-CARE</b>                               |    |        |           |        |        |
| B_EQ5DSC                                       | 12 | 1.25   | .45       | 1      | 2      |
| VR1_EQ5DSC                                     | 12 | 1.25   | .45       | 1      | 2      |
| VR2_EQ5DSC                                     | 12 | 1.17   | .39       | 1      | 2      |
| VR3_EQ5DSC                                     | 12 | 1.17   | .39       | 1      | 2      |
| <b>USUAL ACTIVITIES</b>                        |    |        |           |        |        |
| B_EQ5DUA                                       | 12 | 1.58   | .52       | 1      | 2      |
| VR1_EQ5DUA                                     | 12 | 1.58   | .52       | 1      | 2      |
| VR2_EQ5DUA                                     | 12 | 1.42   | .52       | 1      | 2      |
| VR3_EQ5DUA                                     | 12 | 1.42   | .52       | 1      | 2      |
| <b>PAIN &amp; DISCOMFORT</b>                   |    |        |           |        |        |
| B_EQ5DPD                                       | 12 | 1.50   | .67       | 1      | 3      |
| VR1_EQ5DPD                                     | 12 | 1.58   | .67       | 1      | 3      |
| VR2_EQ5DPD                                     | 12 | 1.33   | .49       | 1      | 2      |
| VR3_EQ5DPD                                     | 12 | 1.67   | .65       | 1      | 3      |
| <b>ANXIETY &amp; DEPRESSION</b>                |    |        |           |        |        |
| B_EQ5DAD                                       | 12 | 1.42   | .52       | 1      | 2      |
| VR1_EQ5DAD                                     | 12 | 1.42   | .52       | 1      | 2      |
| VR2_EQ5DAD                                     | 12 | 1.42   | .52       | 1      | 2      |
| VR3_EQ5DAD                                     | 12 | 1.42   | .67       | 1      | 3      |
| <b>BAROMETER / VAS</b>                         |    |        |           |        |        |
| B_BAROMETER                                    | 12 | 71.83  | 15.30     | 50     | 100    |
| VR1_BAROMETER                                  | 12 | 71.00  | 15.09     | 50     | 100    |
| VR2_BAROMETER                                  | 12 | 72.17  | 16.68     | 40     | 100    |
| VR3_BAROMETER                                  | 12 | 67.50  | 20.62     | 29     | 100    |
| <b>QLQ C30 – EORTC QoL</b>                     |    |        |           |        |        |
| <b>GLOBAL HEALTH SCORE</b>                     |    |        |           |        |        |
| BQLQC30GHS                                     | 11 | -43.18 | 25.77     | -83.33 | -8.33  |
| VR1QLQC30GHS                                   | 11 | -43.94 | 22.39     | -83.33 | -8.33  |
| VR2QLQC30GHS                                   | 11 | -48.48 | 23.51     | -83.33 | -16.67 |
| VR3QLQC30GHS                                   | 11 | -48.48 | 23.81     | -83.33 | -16.67 |
| <b>FUNCTIONAL SCALE</b>                        |    |        |           |        |        |
| BQLQC30FS                                      | 11 | 7.07   | 24.05     | -42.22 | 33.33  |
| VR1QLQC30FS                                    | 11 | 4.44   | 23.83     | -42.22 | 33.33  |
| VR2QLQC30FS                                    | 11 | 7.47   | 24.10     | -44.44 | 33.33  |
| VR3QLQC30FS                                    | 11 | 7.27   | 24.93     | -46.67 | 33.33  |
| <b>SYMPTOM SCORE</b>                           |    |        |           |        |        |
| BQLQC30SS                                      | 11 | 10.02  | 21.13     | -35.90 | 30.77  |
| VR1QLQC30SS                                    | 11 | 8.39   | 20.13     | -35.90 | 30.77  |
| VR2QLQC30SS                                    | 11 | 10.26  | 21.54     | -43.59 | 33.33  |
| VRQLQC30SS                                     | 11 | 10.02  | 21.62     | -43.59 | 33.33  |
| <b>DASS21 – DEPRESSION, ANXIETY, STRESS 21</b> |    |        |           |        |        |
| <b>DEPRESSION</b>                              |    |        |           |        |        |
| BDASDEP                                        | 11 | 9.09   | 9.01      | 0      | 28     |
| VR1DASDEP                                      | 11 | 8.91   | 9.05      | 0      | 28     |
| VR2DASDEP                                      | 11 | 8.73   | 8.40      | 0      | 24     |
| VR3DASDEP                                      | 11 | 6.91   | 7.34      | 0      | 18     |
| <b>ANXIETY</b>                                 |    |        |           |        |        |
| BDASANX                                        | 10 | 8.00   | 8.79      | 0      | 30     |

|    |                                                         |    |       |       |      |      |
|----|---------------------------------------------------------|----|-------|-------|------|------|
| 1  |                                                         |    |       |       |      |      |
| 2  |                                                         |    |       |       |      |      |
| 3  | VR1DASANX                                               | 10 | 6.60  | 5.82  | 0    | 16   |
| 4  | VR2DASANX                                               | 10 | 7.40  | 6.33  | 0    | 18   |
| 5  | VR3DASANX                                               | 10 | 4.60  | 3.53  | 0    | 10   |
| 6  | <b>STRESS</b>                                           |    |       |       |      |      |
| 7  | BDASSTRS                                                | 19 | 13.37 | 8.11  | 0    | 28   |
| 8  | BDASDEP                                                 | 19 | 7.68  | 8.41  | 0    | 28   |
| 9  | BDASANX                                                 | 18 | 7.89  | 7.62  | 0    | 30   |
| 10 | VR3DASSTRS                                              | 13 | 8.15  | 7.89  | 0    | 24   |
| 11 | VR3DASDEP                                               | 12 | 6.67  | 7.05  | 0    | 18   |
| 12 | VR3DASANX                                               | 11 | 4.36  | 3.44  | 0    | 10   |
| 13 | <b>AAQ – ACTION &amp; ACCEPTANCE QUESTIONNAIRE</b>      |    |       |       |      |      |
| 14 | BTOTAAQ                                                 | 12 | 18.75 | 9.30  | 7    | 41   |
| 15 | VR1TAAQ                                                 | 12 | 19.25 | 8.85  | 7    | 39   |
| 16 | VR2TAAQ                                                 | 12 | 21.08 | 10.80 | 7    | 43   |
| 17 | VR3TAAQ                                                 | 12 | 18.08 | 9.06  | 7    | 39   |
| 18 | <b>POMS – PROFILE OF MOOD STATE</b>                     |    |       |       |      |      |
| 19 | VR1PREPOM                                               | 19 | 20.42 | 5.79  | 12   | 36   |
| 20 | VR2PREPOMS                                              | 16 | 21.50 | 7.14  | 9    | 39   |
| 21 | VR3PREPOMS                                              | 13 | 23.62 | 6.97  | 17   | 36   |
| 22 | VR1POSTPOM                                              | 18 | 23.06 | 6.91  | 8    | 36   |
| 23 | VR2POSTPOM                                              | 13 | 22.38 | 4.25  | 16   | 31   |
| 24 | VR3POSTPOM                                              | 13 | 23.31 | 6.74  | 17   | 39   |
| 25 | <b>SCS – SELF-COMPASSION SCALE</b>                      |    |       |       |      |      |
| 26 | <b>SELF-KINDNESS</b>                                    |    |       |       |      |      |
| 27 | BSCSSK                                                  | 10 | 3.14  | .811  | 2.00 | 4.40 |
| 28 | VR1SCSSK                                                | 10 | 3.14  | .79   | 2.00 | 4.20 |
| 29 | VR2SCSSK                                                | 10 | 3.26  | .92   | 1.8  | 5.0  |
| 30 | VR3SCSSK                                                | 10 | 3.30  | 1.13  | 1.8  | 5.0  |
| 31 | <b>SELF-JUDGEMENT</b>                                   |    |       |       |      |      |
| 32 | BSCSSJ                                                  | 10 | 3.48  | 1.05  | 1.40 | 4.80 |
| 33 | VR1SCSSJ                                                | 10 | 3.48  | 1.05  | 1.40 | 4.80 |
| 34 | VR2SCSSJ                                                | 10 | 3.34  | 1.30  | 1.0  | 5.0  |
| 35 | VR3SCSSJ                                                | 10 | 3.50  | 1.14  | 1.6  | 5.0  |
| 36 | <b>COMMON HUMANITY</b>                                  |    |       |       |      |      |
| 37 | BSCSCH                                                  | 10 | 3.13  | .68   | 2.25 | 4.25 |
| 38 | VR1SCSCH                                                | 10 | 3.23  | .79   | 2.25 | 4.75 |
| 39 | VR2SCSCH                                                | 10 | 2.90  | 1.12  | 1.25 | 4.50 |
| 40 | VR3SCSCH                                                | 10 | 3.15  | 1.04  | 1.50 | 5.00 |
| 41 | <b>ISOLATION</b>                                        |    |       |       |      |      |
| 42 | BSCSISO                                                 | 10 | 3.30  | 1.14  | 1.75 | 5.00 |
| 43 | VR1SCSISO                                               | 10 | 3.38  | 1.13  | 1.75 | 5.00 |
| 44 | VR2SCSISO                                               | 10 | 3.43  | 1.13  | 1.75 | 5.00 |
| 45 | VR3SCSISO                                               | 10 | 3.58  | 1.24  | 1.50 | 5.00 |
| 46 | <b>MINDFULNESS</b>                                      |    |       |       |      |      |
| 47 | BSCSM                                                   | 10 | 4.10  | .74   | 3    | 5    |
| 48 | VR1SSCSM                                                | 10 | 4.05  | .64   | 2.75 | 5.00 |
| 49 | VR2SSCSM                                                | 10 | 3.73  | .76   | 2.75 | 5.00 |
| 50 | VR3SSCSM                                                | 10 | 3.75  | .82   | 2.75 | 5.00 |
| 51 | <b>OVER-IDENTIFIED</b>                                  |    |       |       |      |      |
| 52 | BSCSOI                                                  | 10 | 3.30  | 1.12  | 1.50 | 5.00 |
| 53 | VR1SCSOI                                                | 10 | 3.35  | 1.14  | 1.50 | 5.00 |
| 54 | VR2SCSOI                                                | 10 | 3.70  | 1.26  | 1.50 | 5.00 |
| 55 | VR3SCSOI                                                | 10 | 3.58  | 1.24  | 1.50 | 5.00 |
| 56 | <b>LDL – LOCALLY DEVELOPED QUESTIONS</b>                |    |       |       |      |      |
| 57 | VR1LDQTS                                                | 12 | 51.08 | 15.92 | 33   | 80   |
| 58 | VR2LDQTS                                                | 12 | 50.67 | 14.75 | 36   | 77   |
| 59 | VR3LDQTS                                                | 12 | 50.50 | 17.42 | 14   | 77   |
| 60 | <b>WEMWBS WARWICK-EDINBURGH MENTAL WELL-BEING SCALE</b> |    |       |       |      |      |

|                                                                   |    |       |       |    |    |
|-------------------------------------------------------------------|----|-------|-------|----|----|
| BWEMTS                                                            | 19 | 48.74 | 8.92  | 34 | 67 |
| VR1TWEWM                                                          | 19 | 48.58 | 9.17  | 34 | 67 |
| VR2WEMWTS                                                         | 15 | 48.13 | 9.48  | 37 | 70 |
| VR3WEMWTS                                                         | 13 | 49.46 | 10.44 | 39 | 70 |
| <b>AWEMWBS – ADAPTED WARWICK-EDINBURGH METAL WELL-BEING SCALE</b> |    |       |       |    |    |
| VR1TAWEM                                                          | 18 | 53.00 | 8.24  | 36 | 70 |
| 2AWEMTS                                                           | 14 | 54.43 | 12.64 | 37 | 85 |
| VR3AWEMTS                                                         | 13 | 52.69 | 8.98  | 39 | 70 |
| BWEMTS                                                            | 12 | 45.92 | 7.76  | 34 | 58 |
| VR1TAWEM                                                          | 12 | 51.67 | 8.66  | 36 | 70 |
| 2AWEMTS                                                           | 12 | 54.00 | 13.52 | 37 | 85 |
| VR3AWEMTS                                                         | 12 | 52.83 | 9.36  | 39 | 70 |

For peer review only

Supplementary table 3: Number of missing variables (number of participants)

| Measure                                                     | Baseline | VR1              | VR1               | VR2              | VR2               | VR3              | VR3               |
|-------------------------------------------------------------|----------|------------------|-------------------|------------------|-------------------|------------------|-------------------|
|                                                             |          | Pre intervention | Post intervention | Pre intervention | Post intervention | Pre intervention | Post intervention |
| EQ-5D                                                       | 0        | 0                | N/A               | 0                | N/A               | 0                | N/A               |
| QLQ C30                                                     | 0        | 0                | N/A               | 2(2)             | N/A               | 0                | N/A               |
| Action and Acceptance Questionnaire II - AAQII              | 0        | 0                | N/A               | 4(2)             | N/A               | 0                | N/A               |
| Depression, Anxiety and Stress Scale 21 – DASS21            | 7(3)     | 8(2)             | N/A               | 2(2)             | N/A               | 14(2)            | N/A               |
| Profile of Mood State - POMS                                | 6 (2)    | 8(3)             | 5(3)              | 9(3)             | 6(2)              | 1                | 2(2)              |
| Warwick Edinburgh Mental Well-being Scale - WEMWBS          | 1        | 2(1)             |                   | 0                | N/A               | 0                |                   |
| Self-compassion Scale - SCS                                 | 23 (1)   | 2(1)             | N/A               | 0                | N/A               | 0                | N/A               |
| Adapted Warwick Edinburgh Mental Well-being Scale - AWEMWBS | N/A      | N/A              | 0                 | N/A              | 0                 | N/A              | 1                 |
| Locally developed questionnaire                             | N/A      | N/A              | 0                 | N/A              | 1                 | N/A              | 0                 |

**Supplementary Table 4:** Multivariate analyses comparing baseline, VR1, VR2 and VR3 session scores

Friedman Test for EQ-5D-5L, QLQ C30 EORTC, DASS21, AAQ, SCS, LDQ, WEMWBS, AWEMWBS and Heart Rate Variation

| Ranks               |        |                     |        |                     |        |                     |        |
|---------------------|--------|---------------------|--------|---------------------|--------|---------------------|--------|
| Domain              | M Rank |
| B_EQ5DM             | 2.50   | B_EQ5DSC            | 2.58   | B_EQ5DUA            | 2.67   | B_EQ5DPD            | 2.46   |
| VR1_EQ5DM           | 2.50   | VR1_EQ5DSC          | 2.58   | VR1_EQ5DUA          | 2.67   | VR1_EQ5DPD          | 2.63   |
| VR2_EQ5DM           | 2.50   | VR2_EQ5DSC          | 2.42   | VR2_EQ5DUA          | 2.33   | VR2_EQ5DPD          | 2.13   |
| VR3_EQ5DM           | 2.50   | VR3_EQ5DSC          | 2.42   | VR3_EQ5DUA          | 2.33   | VR3_EQ5DPD          | 2.79   |
| <b>N</b>            | 12     | <b>N</b>            | 12     | <b>N</b>            | 12     | <b>N</b>            | 12     |
| <b>Chi-Square</b>   | .000   | <b>Chi-Square</b>   | 2.000  | <b>Chi-Square</b>   | 6.000  | <b>Chi-Square</b>   | 5.526  |
| <b>df</b>           | 3      | <b>df</b>           | 3      | <b>df</b>           | 3      | <b>df</b>           | 3      |
| <b>Asymp. Sign.</b> | 1.000  | <b>Asymp. Sign.</b> | .572   | <b>Asymp. Sign.</b> | .112   | <b>Asymp. Sign.</b> | .137   |
| Domain              | M Rank |
| B_EQ5DAD            | 2.50   | B_BAROMETER         | 2.63   | BQLQC30GHS          | 2.82   |                     |        |
| VR1_EQ5DAD          | 2.50   | VR1_BAROMETER       | 2.42   | VR1QLQC30GHS        | 2.82   |                     |        |
| VR2_EQ5DAD          | 2.50   | VR2_BAROMETER       | 2.67   | VR2QLQC30GHS        | 2.27   |                     |        |
| VR3_EQ5DAD          | 2.50   | VR3_BAROMETER       | 2.29   | VR3QLQC30GHS        | 2.09   |                     |        |
| <b>N</b>            | 12     | <b>N</b>            | 12     | <b>N</b>            | 11     |                     |        |
| <b>Chi-Square</b>   | .000   | <b>Chi-Square</b>   | .880   | <b>Chi-Square</b>   | 4.935  |                     |        |
| <b>df</b>           | 3      | <b>df</b>           | 3      | <b>df</b>           | 3      |                     |        |
| <b>Asymp. Sign.</b> | 1.000  | <b>Asymp. Sign.</b> | .830   | <b>Asymp. Sign.</b> | .177   |                     |        |
| Domain              | M Rank |
| BQLQC30FS           | 2.41   | BQLQC30SS           | 2.64   | BDASDEP             | 2.59   |                     |        |
| VR1QLQC30FS         | 2.18   | VR1QLQC30SS         | 2.00   | VR1DASDEP           | 2.45   |                     |        |
| VR2QLQC30FS         | 2.64   | VR2QLQC30SS         | 2.77   | VR2DASDEP           | 2.59   |                     |        |
| VR3QLQC30FS         | 2.77   | VRQLQC30SS          | 2.59   | VR3DASDEP           | 2.36   |                     |        |
| <b>N</b>            | 11     | <b>N</b>            | 11     | <b>N</b>            | 11     |                     |        |
| <b>Chi-Square</b>   | 1.709  | <b>Chi-Square</b>   | 3.000  | <b>Chi-Square</b>   | .365   |                     |        |
| <b>df</b>           | 3      | <b>df</b>           | 3      | <b>df</b>           | 3      |                     |        |
| <b>Asymp. Sign.</b> | .635   | <b>Asymp. Sign.</b> | .392   | <b>Asymp. Sign.</b> | .947   |                     |        |
| Domain              | M Rank |
| BDASANX             | 2.75   | BDASSTRS            | 2.96   | BTOTAAQ             | 2.38   |                     |        |
| VR1DASANX           | 2.50   | VR1DASSTRS          | 2.92   | VR1TAAQ             | 2.63   |                     |        |
| VR2DASANX           | 2.80   | VR2DASSTRS          | 2.38   | VR2TAAQ             | 3.04   |                     |        |
| VR3DASANX           | 1.95   | VR3DASSTRS          | 1.75   | VR3TAAQ             | 1.96   |                     |        |
| <b>N</b>            | 10     | <b>N</b>            | 12     | <b>N</b>            | 12     |                     |        |
| <b>Chi-Square</b>   | 4.789  | <b>Chi-Square</b>   | 8.656  | <b>Chi-Square</b>   | 5.742  |                     |        |
| <b>df</b>           | 3      | <b>df</b>           | 3      | <b>df</b>           | 3      |                     |        |
| <b>Asymp. Sign.</b> | .188   | <b>Asymp. Sign.</b> | .034   | <b>Asymp. Sign.</b> | .125   |                     |        |
| Domain              | M Rank |
| BSCSSK              | 2.50   | BSCSSJ              | 2.25   | BSCSCH              | 2.25   |                     |        |
| VR1SCSSK            | 2.45   | VR1SCSSJ            | 2.25   | VR1SCSCH            | 2.65   |                     |        |
| VR2SCSSK            | 2.30   | VR2SCSSJ            | 2.60   | VR2SCSCH            | 2.40   |                     |        |
| VR3SCSSK            | 2.75   | VR3SCSSJ            | 2.90   | VR3SCSCH            | 2.70   |                     |        |
| <b>N</b>            | 10     | <b>N</b>            | 10     | <b>N</b>            | 10     |                     |        |
| <b>Chi-Square</b>   | .733   | <b>Chi-Square</b>   | 2.133  | <b>Chi-Square</b>   | .976   |                     |        |
| <b>df</b>           | 3      | <b>df</b>           | 3      | <b>df</b>           | 3      |                     |        |
| <b>Asymp. Sign.</b> | .866   | <b>Asymp. Sign.</b> | .545   | <b>Asymp. Sign.</b> | .807   |                     |        |
| Domain              | M Rank |
| BSCSISO             | 2.20   | BSCSM               | 2.90   | BSCSOI              | 2.05   |                     |        |
| VR1SCSISO           | 2.40   | VR1SSCSM            | 2.90   | VR1SCSOI            | 2.25   |                     |        |
| VR2SCSISO           | 2.75   | VR2SSCSM            | 2.05   | VR2SCSOI            | 2.95   |                     |        |
| VR3SCSISO           | 2.65   | VR3SSCSM            | 2.15   | VR3SCSOI            | 2.75   |                     |        |
| <b>N</b>            | 10     | <b>N</b>            | 10     | <b>N</b>            | 10     |                     |        |
| <b>Chi-Square</b>   | 2.018  | <b>Chi-Square</b>   | 5.230  | <b>Chi-Square</b>   | 4.417  |                     |        |
| <b>df</b>           | 3      | <b>df</b>           | 3      | <b>df</b>           | 3      |                     |        |

1  
2  
3  
4  
5  
6  
7  
8  
9  
10  
11  
12  
13  
14  
15  
16  
17  
18  
19  
20  
21  
22  
23  
24  
25  
26  
27  
28  
29  
30  
31  
32  
33  
34  
35  
36  
37  
38  
39  
40  
41  
42  
43  
44  
45  
46  
47  
48  
49  
50  
51  
52  
53  
54  
55  
56  
57  
58  
59  
60

|                     |               |                     |               |                     |               |
|---------------------|---------------|---------------------|---------------|---------------------|---------------|
| <b>Asymp. Sign.</b> | .569          | <b>Asymp. Sign.</b> | .156          | <b>Asymp. Sign.</b> | .220          |
| <b>Domain</b>       | <b>M Rank</b> | <b>Domain</b>       | <b>M Rank</b> | <b>Domain</b>       | <b>M Rank</b> |
| VR1LDQTS            | 2.13          | BWEMTS              | 1.38          | VR1 HRV Pre         | 2.00          |
| VR2LDQTS            | 1.83          | VR1TAWEM            | 2.75          | VR1 HRV Mid         | 2.00          |
| VR3LDQTS            | 2.04          | 2AWEMTS             | 2.83          | VR1 HRV Post        | 2.00          |
| VR1LDQTS            | 2.13          | VR3AWEMTS           | 3.04          | VR1 HRV Pre         | 2.00          |
| <b>N</b>            | 12            | <b>N</b>            | 12            | <b>N</b>            | 3             |
| <b>Chi-Square</b>   | .565          | <b>Chi-Square</b>   | 12.905        | <b>Chi-Square</b>   | .000          |
| <b>df</b>           | 2             | <b>df</b>           | 3             | <b>df</b>           | 2             |
| <b>Asymp. Sign.</b> | .754          | <b>Asymp. Sign.</b> | .005          | <b>Asymp. Sign.</b> | 1.000         |

For peer review only

**Supplementary Table 5: Multi-variate analyses comparing baseline to VR3 session scores**

Wilcoxon Signed Ranks Test for DASS21, AAQ, WEMWBS &amp; AWEMWBS, POMS and SSC

| <b>DASS21</b>                  |                           | <b>N</b>                   | <b>Mean Rank</b>           | <b>Sum of Ranks</b> |
|--------------------------------|---------------------------|----------------------------|----------------------------|---------------------|
| <b>VR3DASSTRS - BDASSTRS</b>   | Negative Ranks            | 9 <sup>a</sup>             | 6.33                       | 57.00               |
|                                | Positive Ranks            | 2 <sup>b</sup>             | 4.50                       | 9.00                |
|                                | Ties                      | 2 <sup>c</sup>             |                            |                     |
|                                | Total                     | 13                         |                            |                     |
| <b>VR3DASDEP - BDASDEP</b>     | Negative Ranks            | 5 <sup>d</sup>             | 5.20                       | 26.00               |
|                                | Positive Ranks            | 4 <sup>e</sup>             | 4.75                       | 19.00               |
|                                | Ties                      | 3 <sup>f</sup>             |                            |                     |
|                                | Total                     | 12                         |                            |                     |
| <b>VR3DASANX - BDASANX</b>     | Negative Ranks            | 5 <sup>g</sup>             | 3.00                       | 15.00               |
|                                | Positive Ranks            | 0 <sup>h</sup>             | .00                        | .00                 |
|                                | Ties                      | 6 <sup>i</sup>             |                            |                     |
|                                | Total                     | 11                         |                            |                     |
| <b>Test statistics</b>         |                           |                            |                            |                     |
|                                | VR3DASSTRS -<br>BDASSTRS  | VR3DASDEP -<br>BDASDEP     | VR3DASANX -<br>BDASANX     |                     |
| <b>Z</b>                       | -2.138 <sup>b</sup>       | -.418 <sup>b</sup>         |                            | -2.032 <sup>b</sup> |
| <b>Asymp. Sig. (2-tailed)</b>  | .033                      | .676                       |                            | .042                |
| <b>AAQ</b>                     |                           |                            |                            |                     |
|                                |                           | <b>N</b>                   | <b>Mean Rank</b>           | <b>Sum of Ranks</b> |
| <b>VR1POSTPOM - VR1PREPOM</b>  | Negative Ranks            | 2 <sup>a</sup>             | 7.50                       | 15.00               |
|                                | Positive Ranks            | 11 <sup>b</sup>            | 6.91                       | 76.00               |
|                                | Ties                      | 5 <sup>c</sup>             |                            |                     |
|                                | Total                     | 18                         |                            |                     |
| <b>VR2POSTPOM - VR2PREPOMS</b> | Negative Ranks            | 6 <sup>d</sup>             | 4.17                       | 25.00               |
|                                | Positive Ranks            | 4 <sup>e</sup>             | 7.50                       | 30.00               |
|                                | Ties                      | 3 <sup>f</sup>             |                            |                     |
|                                | Total                     | 13                         |                            |                     |
| <b>VR3POSTPOM - VR3PREPOMS</b> | Negative Ranks            | 4 <sup>g</sup>             | 3.00                       | 12.00               |
|                                | Positive Ranks            | 2 <sup>h</sup>             | 4.50                       | 9.00                |
|                                | Ties                      | 7 <sup>i</sup>             |                            |                     |
|                                | Total                     | 13                         |                            |                     |
| <b>Test statistics</b>         |                           |                            |                            |                     |
|                                | VR1POSTPOM -<br>VR1PREPOM | VR2POSTPOM -<br>VR2PREPOMS | VR3POSTPOM -<br>VR3PREPOMS |                     |
| <b>Z</b>                       | -2.136 <sup>b</sup>       | -.255 <sup>b</sup>         |                            | -.315 <sup>c</sup>  |
| <b>Asymp. Sig. (2-tailed)</b>  | .033                      | .799                       |                            | .752                |
| <b>WEMWBS &amp; AWEMWBS</b>    |                           |                            |                            |                     |
|                                |                           | <b>N</b>                   | <b>Mean Rank</b>           | <b>Sum of Ranks</b> |
| <b>VR1TAWEM - VR1TWEWM</b>     | Negative Ranks            | 2 <sup>d</sup>             | 5.00                       | 10.00               |
|                                | Positive Ranks            | 13 <sup>e</sup>            | 8.46                       | 110.00              |
|                                | Ties                      | 3 <sup>f</sup>             |                            |                     |
|                                | Total                     | 18                         |                            |                     |
| <b>2AWEMTS - VR2WEMWTS</b>     | Negative Ranks            | 2 <sup>g</sup>             | 1.50                       | 3.00                |
|                                | Positive Ranks            | 8 <sup>h</sup>             | 6.50                       | 52.00               |
|                                | Ties                      | 4 <sup>i</sup>             |                            |                     |
|                                | Total                     | 14                         |                            |                     |
| <b>VR3AWEMTS - VR3WEMWTS</b>   | Negative Ranks            | 1 <sup>j</sup>             | 1.50                       | 1.50                |
|                                | Positive Ranks            | 8 <sup>k</sup>             | 5.44                       | 43.50               |
|                                | Ties                      | 4 <sup>l</sup>             |                            |                     |
|                                | Total                     | 13                         |                            |                     |
| <b>Test statistics</b>         |                           |                            |                            |                     |
|                                | VR1TAWEM -<br>VR1TWEWM    | 2AWEMTS -<br>VR2WEMWTS     | VR3AWEMTS -<br>VR3WEMWTS   |                     |
| <b>Z</b>                       | -2.846 <sup>b</sup>       | -2.501 <sup>b</sup>        |                            | -2.492 <sup>b</sup> |
| <b>Asymp. Sig. (2-tailed)</b>  | .004                      | .012                       |                            | .013                |

| POMS                          |                        | N                       | Mean Rank               | Sum of Ranks        |                     |                     |
|-------------------------------|------------------------|-------------------------|-------------------------|---------------------|---------------------|---------------------|
| VR1POSTPOM - VR1PREPOM        | Negative Ranks         | 2 <sup>a</sup>          | 7.50                    | 15.00               |                     |                     |
|                               | Positive Ranks         | 11 <sup>b</sup>         | 6.91                    | 76.00               |                     |                     |
|                               | Ties                   | 5 <sup>c</sup>          |                         |                     |                     |                     |
|                               | Total                  | 18                      |                         |                     |                     |                     |
| VR2POSTPOM - VR2PREPOMS       | Negative Ranks         | 6 <sup>d</sup>          | 4.17                    | 25.00               |                     |                     |
|                               | Positive Ranks         | 4 <sup>e</sup>          | 7.50                    | 30.00               |                     |                     |
|                               | Ties                   | 3 <sup>f</sup>          |                         |                     |                     |                     |
|                               | Total                  | 13                      |                         |                     |                     |                     |
| VR3POSTPOM - VR3PREPOMS       | Negative Ranks         | 4 <sup>g</sup>          | 3.00                    | 12.00               |                     |                     |
|                               | Positive Ranks         | 2 <sup>h</sup>          | 4.50                    | 9.00                |                     |                     |
|                               | Ties                   | 7 <sup>i</sup>          |                         |                     |                     |                     |
|                               | Total                  | 13                      |                         |                     |                     |                     |
| <b>Test statistics</b>        |                        |                         |                         |                     |                     |                     |
|                               | VR1POSTPOM - VR1PREPOM | VR2POSTPOM - VR2PREPOMS | VR3POSTPOM - VR3PREPOMS |                     |                     |                     |
| <b>Z</b>                      | -2.136 <sup>b</sup>    | -.255 <sup>b</sup>      |                         | -.315 <sup>c</sup>  |                     |                     |
| <b>Asymp. Sig. (2-tailed)</b> | .033                   | .799                    |                         | .752                |                     |                     |
| <b>SSC</b>                    |                        |                         |                         |                     |                     |                     |
|                               | VR3SCSSK - BSCSSK      | VR3SCSSJ - BSCSSJ       | VR3SCSCH - BSCSCH       | VR3SCSISO - BSCSISO | VR3SSCSM - BSCSM    | VR3SCSOI - BSCSOI   |
| <b>Z</b>                      | -1.011 <sup>b</sup>    | -.978 <sup>b</sup>      | -.224 <sup>c</sup>      | -1.261 <sup>b</sup> | -1.605 <sup>c</sup> | -1.430 <sup>b</sup> |
| <b>Asymp. Sig. (2-tailed)</b> | .312                   | .328                    | .823                    | .207                | .108                | .153                |



**Supplementary Tables 5a & 5b:** Multi-variate analyses comparing VR session scores

ANOVA for Electrodermal Activity (EDA) and Heart Rate

**Suppl Table 5a** Physiology Data – Electrodermal Activity (EDA) – VR 1 – Pre/Mid/Post**DESCRIPTIVE STATISTICS**

|                     | Mean  | Std. Deviation | N |
|---------------------|-------|----------------|---|
| <b>VR1 EDA PRE</b>  | 11.50 | 3.416          | 4 |
| <b>VR1 EDA MID</b>  | 8.75  | 2.217          | 4 |
| <b>VR1 EDA POST</b> | 8.25  | 2.062          | 4 |

**TESTS OF WITHIN-SUBJECTS EFFECTS**

| SOURCE             |                    | Type III Sum of Squares | df    | Mean Square | F      | Sig. | Partial Eta Squared |
|--------------------|--------------------|-------------------------|-------|-------------|--------|------|---------------------|
| <b>EDA1</b>        | Sphericity Assumed | 24.500                  | 2     | 12.250      | 13.364 | .006 | .817                |
|                    | Greenhouse-Geisser | 24.500                  | 1.658 | 14.781      | 13.364 | .011 | .817                |
|                    | Huynh-Feldt        | 24.500                  | 2.000 | 12.250      | 13.364 | .006 | .817                |
|                    | Lower-bound        | 24.500                  | 1.000 | 24.500      | 13.364 | .035 | .817                |
| <b>ERROR(EDA1)</b> | Sphericity Assumed | 5.500                   | 6     | .917        |        |      |                     |
|                    | Greenhouse-Geisser | 5.500                   | 4.973 | 1.106       |        |      |                     |
|                    | Huynh-Feldt        | 5.500                   | 6.000 | .917        |        |      |                     |
|                    | Lower-bound        | 5.500                   | 3.000 | 1.833       |        |      |                     |

**Suppl Table 5b** Physiology Data – Heart Rate – VR 2 – Pre/Mid/Post**DESCRIPTIVE STATISTICS**

|                    | Mean  | Std. Deviation | N |
|--------------------|-------|----------------|---|
| <b>VR2 HR PRE</b>  | 75.75 | 6.185          | 4 |
| <b>VR2 HR MID</b>  | 73.75 | 6.850          | 4 |
| <b>VR2 HR POST</b> | 75.00 | 6.683          | 4 |

**TESTS OF WITHIN-SUBJECTS EFFECTS**

| SOURCE            |                    | Type III Sum of Squares | df    | Mean Square | F      | Sig. | Partial Eta Squared |
|-------------------|--------------------|-------------------------|-------|-------------|--------|------|---------------------|
| <b>HR2</b>        | Sphericity Assumed | 8.167                   | 2     | 4.083       | 13.364 | .006 | .817                |
|                   | Greenhouse-Geisser | 8.167                   | 1.424 | 5.737       | 13.364 | .017 | .817                |
|                   | Huynh-Feldt        | 8.167                   | 2.000 | 4.083       | 13.364 | .006 | .817                |
|                   | Lower-bound        | 8.167                   | 1.000 | 8.167       | 13.364 | .035 | .817                |
| <b>ERROR(HR2)</b> | Sphericity Assumed | 1.833                   | 6     | .306        |        |      |                     |
|                   | Greenhouse-Geisser | 1.833                   | 4.271 | .429        |        |      |                     |
|                   | Huynh-Feldt        | 1.833                   | 6.000 | .306        |        |      |                     |
|                   | Lower-bound        | 1.833                   | 3.000 | .611        |        |      |                     |

## Standards for Reporting Qualitative Research (SRQR)\*

<http://www.equator-network.org/reporting-guidelines/srqr/>

Page/line no(s).

### Title and abstract

|                                                                                                                                                                                                                                                              |                                          |
|--------------------------------------------------------------------------------------------------------------------------------------------------------------------------------------------------------------------------------------------------------------|------------------------------------------|
| <p><b>Title</b> - Concise description of the nature and topic of the study Identifying the study as qualitative or indicating the approach (e.g., ethnography, grounded theory) or data collection methods (e.g., interview, focus group) is recommended</p> | <p>Co-design approach highlighted</p>    |
| <p><b>Abstract</b> - Summary of key elements of the study using the abstract format of the intended publication; typically includes background, purpose, methods, results, and conclusions</p>                                                               | <p>Page 4, as per publication format</p> |

### Introduction

|                                                                                                                                                                     |                                |
|---------------------------------------------------------------------------------------------------------------------------------------------------------------------|--------------------------------|
| <p><b>Problem formulation</b> - Description and significance of the problem/phenomenon studied; review of relevant theory and empirical work; problem statement</p> | <p>Page 5, para 1, 2 and 3</p> |
| <p><b>Purpose or research question</b> - Purpose of the study and specific objectives or questions</p>                                                              | <p>Page 5, para 4</p>          |

### Methods

|                                                                                                                                                                                                                                                                                                                                                                                                             |                                                                                                                                                                                                           |
|-------------------------------------------------------------------------------------------------------------------------------------------------------------------------------------------------------------------------------------------------------------------------------------------------------------------------------------------------------------------------------------------------------------|-----------------------------------------------------------------------------------------------------------------------------------------------------------------------------------------------------------|
| <p><b>Qualitative approach and research paradigm</b> - Qualitative approach (e.g., ethnography, grounded theory, case study, phenomenology, narrative research) and guiding theory if appropriate; identifying the research paradigm (e.g., postpositivist, constructivist/ interpretivist) is also recommended; rationale**</p>                                                                            | <ul style="list-style-type: none"> <li>• Abstract, page 4</li> <li>• Page 5, para 5: Methods</li> <li>• Page 7, last line</li> <li>• Page 10: Qualitative</li> <li>• Rationale: Page 5, para 5</li> </ul> |
| <p><b>Researcher characteristics and reflexivity</b> - Researchers' characteristics that may influence the research, including personal attributes, qualifications/experience, relationship with participants, assumptions, and/or presuppositions; potential or actual interaction between researchers' characteristics and the research questions, approach, methods, results, and/or transferability</p> | <ul style="list-style-type: none"> <li>• Page 7, para 5: procedure</li> <li>• Page 7: Phase 1- intervention development</li> </ul>                                                                        |
| <p><b>Context</b> - Setting/site and salient contextual factors; rationale**</p>                                                                                                                                                                                                                                                                                                                            | <p>Page 7, para5: Procedure</p>                                                                                                                                                                           |
| <p><b>Sampling strategy</b> - How and why research participants, documents, or events were selected; criteria for deciding when no further sampling was necessary (e.g., sampling saturation); rationale**</p>                                                                                                                                                                                              | <ul style="list-style-type: none"> <li>• Abstract, page 4</li> <li>• Page 5: Compassion focused therapy</li> <li>• Page 7: Procedure</li> <li>• Rationale: Page 7 - procedure</li> </ul>                  |
| <p><b>Ethical issues pertaining to human subjects</b> - Documentation of approval by an appropriate ethics review board and participant consent, or explanation for lack thereof; other confidentiality and data security issues</p>                                                                                                                                                                        | <p>Page 7: procedure</p>                                                                                                                                                                                  |

|    |                                                                                                                                                                                                                                                                                                                          |                                                                                                                                                                                                                                                                                             |
|----|--------------------------------------------------------------------------------------------------------------------------------------------------------------------------------------------------------------------------------------------------------------------------------------------------------------------------|---------------------------------------------------------------------------------------------------------------------------------------------------------------------------------------------------------------------------------------------------------------------------------------------|
| 1  |                                                                                                                                                                                                                                                                                                                          | <ul style="list-style-type: none"> <li>• Abstract, page 4</li> <li>• Methods, page 5</li> <li>• Page 6, para 2: Instruments for psychological assessment</li> <li>• Page 8, para 1</li> <li>• Page 8, Findings from Phase 1</li> <li>• Page 8, Phase 2: Evaluation/Acceptability</li> </ul> |
| 2  |                                                                                                                                                                                                                                                                                                                          |                                                                                                                                                                                                                                                                                             |
| 3  |                                                                                                                                                                                                                                                                                                                          |                                                                                                                                                                                                                                                                                             |
| 4  |                                                                                                                                                                                                                                                                                                                          |                                                                                                                                                                                                                                                                                             |
| 5  |                                                                                                                                                                                                                                                                                                                          |                                                                                                                                                                                                                                                                                             |
| 6  |                                                                                                                                                                                                                                                                                                                          |                                                                                                                                                                                                                                                                                             |
| 7  |                                                                                                                                                                                                                                                                                                                          |                                                                                                                                                                                                                                                                                             |
| 8  |                                                                                                                                                                                                                                                                                                                          |                                                                                                                                                                                                                                                                                             |
| 9  |                                                                                                                                                                                                                                                                                                                          |                                                                                                                                                                                                                                                                                             |
| 10 |                                                                                                                                                                                                                                                                                                                          |                                                                                                                                                                                                                                                                                             |
| 11 |                                                                                                                                                                                                                                                                                                                          |                                                                                                                                                                                                                                                                                             |
| 12 | <b>Data collection methods</b> - Types of data collected; details of data collection procedures including (as appropriate) start and stop dates of data collection and analysis, iterative process, triangulation of sources/methods, and modification of procedures in response to evolving study findings; rationale** |                                                                                                                                                                                                                                                                                             |
| 13 |                                                                                                                                                                                                                                                                                                                          |                                                                                                                                                                                                                                                                                             |
| 14 |                                                                                                                                                                                                                                                                                                                          |                                                                                                                                                                                                                                                                                             |
| 15 |                                                                                                                                                                                                                                                                                                                          |                                                                                                                                                                                                                                                                                             |
| 16 |                                                                                                                                                                                                                                                                                                                          |                                                                                                                                                                                                                                                                                             |
| 17 |                                                                                                                                                                                                                                                                                                                          |                                                                                                                                                                                                                                                                                             |
| 18 | <b>Data collection instruments and technologies</b> - Description of instruments (e.g., interview guides, questionnaires) and devices (e.g., audio recorders) used for data collection; if/how the instrument(s) changed over the course of the study                                                                    | Page 10: Qualitative section                                                                                                                                                                                                                                                                |
| 19 |                                                                                                                                                                                                                                                                                                                          |                                                                                                                                                                                                                                                                                             |
| 20 |                                                                                                                                                                                                                                                                                                                          |                                                                                                                                                                                                                                                                                             |
| 21 |                                                                                                                                                                                                                                                                                                                          |                                                                                                                                                                                                                                                                                             |
| 22 |                                                                                                                                                                                                                                                                                                                          |                                                                                                                                                                                                                                                                                             |
| 23 |                                                                                                                                                                                                                                                                                                                          |                                                                                                                                                                                                                                                                                             |
| 24 |                                                                                                                                                                                                                                                                                                                          |                                                                                                                                                                                                                                                                                             |
| 25 |                                                                                                                                                                                                                                                                                                                          |                                                                                                                                                                                                                                                                                             |
| 26 |                                                                                                                                                                                                                                                                                                                          |                                                                                                                                                                                                                                                                                             |
| 27 |                                                                                                                                                                                                                                                                                                                          |                                                                                                                                                                                                                                                                                             |
| 28 | <b>Units of study</b> - Number and relevant characteristics of participants, documents, or events included in the study; level of participation (could be reported in results)                                                                                                                                           | <ul style="list-style-type: none"> <li>• Page 8: Initial design workshop</li> <li>• Page 8: User testing workshops</li> <li>• Page 10: Qualitative section</li> <li>• Table 4</li> </ul>                                                                                                    |
| 29 |                                                                                                                                                                                                                                                                                                                          |                                                                                                                                                                                                                                                                                             |
| 30 |                                                                                                                                                                                                                                                                                                                          |                                                                                                                                                                                                                                                                                             |
| 31 |                                                                                                                                                                                                                                                                                                                          |                                                                                                                                                                                                                                                                                             |
| 32 | <b>Data processing</b> - Methods for processing data prior to and during analysis, including transcription, data entry, data management and security, verification of data integrity, data coding, and anonymization/de-identification of excerpts                                                                       | <ul style="list-style-type: none"> <li>• Page 8: Initial design workshop</li> <li>• Page 10: Qualitative section</li> </ul>                                                                                                                                                                 |
| 33 |                                                                                                                                                                                                                                                                                                                          |                                                                                                                                                                                                                                                                                             |
| 34 |                                                                                                                                                                                                                                                                                                                          |                                                                                                                                                                                                                                                                                             |
| 35 |                                                                                                                                                                                                                                                                                                                          |                                                                                                                                                                                                                                                                                             |
| 36 | <b>Data analysis</b> - Process by which inferences, themes, etc., were identified and developed, including the researchers involved in data analysis; usually references a specific paradigm or approach; rationale**                                                                                                    | <ul style="list-style-type: none"> <li>• Page 7: Phase 1 interviews</li> <li>• Page 10: Qualitative section</li> </ul>                                                                                                                                                                      |
| 37 |                                                                                                                                                                                                                                                                                                                          |                                                                                                                                                                                                                                                                                             |
| 38 |                                                                                                                                                                                                                                                                                                                          |                                                                                                                                                                                                                                                                                             |
| 39 |                                                                                                                                                                                                                                                                                                                          |                                                                                                                                                                                                                                                                                             |
| 40 | <b>Techniques to enhance trustworthiness</b> - Techniques to enhance trustworthiness and credibility of data analysis (e.g., member checking, audit trail, triangulation); rationale**                                                                                                                                   | Page 10: Qualitative section                                                                                                                                                                                                                                                                |
| 41 |                                                                                                                                                                                                                                                                                                                          |                                                                                                                                                                                                                                                                                             |
| 42 |                                                                                                                                                                                                                                                                                                                          |                                                                                                                                                                                                                                                                                             |
| 43 |                                                                                                                                                                                                                                                                                                                          |                                                                                                                                                                                                                                                                                             |
| 44 |                                                                                                                                                                                                                                                                                                                          |                                                                                                                                                                                                                                                                                             |

## Results/findings

|    |                                                                                                                                                                                                   |                                                       |
|----|---------------------------------------------------------------------------------------------------------------------------------------------------------------------------------------------------|-------------------------------------------------------|
| 45 |                                                                                                                                                                                                   |                                                       |
| 46 | <b>Synthesis and interpretation</b> - Main findings (e.g., interpretations, inferences, and themes); might include development of a theory or model, or integration with prior research or theory | Page 8: Initial design/user testing workshop/findings |
| 47 |                                                                                                                                                                                                   |                                                       |
| 48 |                                                                                                                                                                                                   |                                                       |
| 49 |                                                                                                                                                                                                   |                                                       |
| 50 | <b>Links to empirical data</b> - Evidence (e.g., quotes, field notes, text excerpts, photographs) to substantiate analytic findings                                                               | Page 10-12: Qualitative quotes                        |
| 51 |                                                                                                                                                                                                   |                                                       |
| 52 |                                                                                                                                                                                                   |                                                       |

## Discussion

|                                                                                                                                                                                                                                                                                                                                                                                                                    |                                                                                                                        |
|--------------------------------------------------------------------------------------------------------------------------------------------------------------------------------------------------------------------------------------------------------------------------------------------------------------------------------------------------------------------------------------------------------------------|------------------------------------------------------------------------------------------------------------------------|
| <p><b>Integration with prior work, implications, transferability, and contribution(s) to the field</b> - Short summary of main findings; explanation of how findings and conclusions connect to, support, elaborate on, or challenge conclusions of earlier scholarship; discussion of scope of application/generalizability; identification of unique contribution(s) to scholarship in a discipline or field</p> | <ul style="list-style-type: none"> <li>• Page 13: Discussion, para 1 and 2</li> <li>• Page 14, para 1 and 2</li> </ul> |
| <p><b>Limitations</b> - Trustworthiness and limitations of findings</p>                                                                                                                                                                                                                                                                                                                                            | <p>Article summary page 3<br/>Page 14, para 2</p>                                                                      |

## Other

|                                                                                                                                                      |                                                                                                               |
|------------------------------------------------------------------------------------------------------------------------------------------------------|---------------------------------------------------------------------------------------------------------------|
| <p><b>Conflicts of interest</b> - Potential sources of influence or perceived influence on study conduct and conclusions; how these were managed</p> | <p>None declared</p>                                                                                          |
| <p><b>Funding</b> - Sources of funding and other support; role of funders in data collection, interpretation, and reporting</p>                      | <p>Funding acknowledged Page 14, last line. Not involved in data collecting, interpretation or reporting.</p> |

\*The authors created the SRQR by searching the literature to identify guidelines, reporting standards, and critical appraisal criteria for qualitative research; reviewing the reference lists of retrieved sources; and contacting experts to gain feedback. The SRQR aims to improve the transparency of all aspects of qualitative research by providing clear standards for reporting qualitative research.

\*\*The rationale should briefly discuss the justification for choosing that theory, approach, method, or technique rather than other options available, the assumptions and limitations implicit in those choices, and how those choices influence study conclusions and transferability. As appropriate, the rationale for several items might be discussed together.

### Reference:

O'Brien BC, Harris IB, Beckman TJ, Reed DA, Cook DA. **Standards for reporting qualitative research: a synthesis of recommendations.** *Academic Medicine*, Vol. 89, No. 9 / Sept 2014  
DOI: [10.1097/ACM.0000000000000388](https://doi.org/10.1097/ACM.0000000000000388)

**STROBE 2007 (v4) Statement—Checklist of items that should be included in reports of cohort studies**

| Section/Topic                | Item # | Recommendation                                                                                                                                                                       | Reported on page #                |
|------------------------------|--------|--------------------------------------------------------------------------------------------------------------------------------------------------------------------------------------|-----------------------------------|
| <b>Title and abstract</b>    | 1      | (a) Indicate the study’s design with a commonly used term in the title or the abstract                                                                                               | Page 1 and 4                      |
|                              |        | (b) Provide in the abstract an informative and balanced summary of what was done and what was found                                                                                  | Page 4                            |
| <b>Introduction</b>          |        |                                                                                                                                                                                      |                                   |
| Background/rationale         | 2      | Explain the scientific background and rationale for the investigation being reported                                                                                                 | Page 5                            |
| Objectives                   | 3      | State specific objectives, including any prespecified hypotheses                                                                                                                     | Page 4 abstract                   |
| <b>Methods</b>               |        |                                                                                                                                                                                      |                                   |
| Study design                 | 4      | Present key elements of study design early in the paper                                                                                                                              | Page 5 and 6                      |
| Setting                      | 5      | Describe the setting, locations, and relevant dates, including periods of recruitment, exposure, follow-up, and data collection                                                      | Page 7                            |
| Participants                 | 6      | (a) Give the eligibility criteria, and the sources and methods of selection of participants. Describe methods of follow-up                                                           | Page 7 and table 1                |
|                              |        | (b) For matched studies, give matching criteria and number of exposed and unexposed                                                                                                  | N/A                               |
| Variables                    | 7      | Clearly define all outcomes, exposures, predictors, potential confounders, and effect modifiers. Give diagnostic criteria, if applicable                                             | Page 6 and 7                      |
| Data sources/<br>measurement | 8*     | For each variable of interest, give sources of data and details of methods of assessment (measurement). Describe comparability of assessment methods if there is more than one group | Page 6 and 7                      |
| Bias                         | 9      | Describe any efforts to address potential sources of bias                                                                                                                            |                                   |
| Study size                   | 10     | Explain how the study size was arrived at                                                                                                                                            | Page 5 and 6, Page 14             |
| Quantitative variables       | 11     | Explain how quantitative variables were handled in the analyses. If applicable, describe which groupings were chosen and why                                                         | Page 9 and 10                     |
| Statistical methods          | 12     | (a) Describe all statistical methods, including those used to control for confounding                                                                                                | Page 9 and 10                     |
|                              |        | (b) Describe any methods used to examine subgroups and interactions                                                                                                                  | Page 9 and 10                     |
|                              |        | (c) Explain how missing data were addressed                                                                                                                                          | Page 9 and appendix suppl table 1 |
|                              |        | (d) If applicable, explain how loss to follow-up was addressed                                                                                                                       | N/A                               |

|                          |     |                                                                                                                                                                                                              |                                    |
|--------------------------|-----|--------------------------------------------------------------------------------------------------------------------------------------------------------------------------------------------------------------|------------------------------------|
|                          |     | (e) Describe any sensitivity analyses                                                                                                                                                                        | N/A                                |
| <b>Results</b>           |     |                                                                                                                                                                                                              |                                    |
| Participants             | 13* | (a) Report numbers of individuals at each stage of study—eg numbers potentially eligible, examined for eligibility, confirmed eligible, included in the study, completing follow-up, and analysed            | Page 8, 9, 10 and table 3          |
|                          |     | (b) Give reasons for non-participation at each stage                                                                                                                                                         | Page 9 and table 3                 |
|                          |     | (c) Consider use of a flow diagram                                                                                                                                                                           |                                    |
| Descriptive data         | 14* | (a) Give characteristics of study participants (eg demographic, clinical, social) and information on exposures and potential confounders                                                                     | Page 9, Tables 1, 2, 3             |
|                          |     | (b) Indicate number of participants with missing data for each variable of interest                                                                                                                          | Page 9, Supp table 3               |
|                          |     | (c) Summarise follow-up time (eg, average and total amount)                                                                                                                                                  | Page 8                             |
| Outcome data             | 15* | Report numbers of outcome events or summary measures over time                                                                                                                                               | Page 9 and 10, Supp Tables 2, 4, 5 |
| Main results             | 16  | (a) Give unadjusted estimates and, if applicable, confounder-adjusted estimates and their precision (eg, 95% confidence interval). Make clear which confounders were adjusted for and why they were included | Page 8                             |
|                          |     | (b) Report category boundaries when continuous variables were categorized                                                                                                                                    | Page 8                             |
|                          |     | (c) If relevant, consider translating estimates of relative risk into absolute risk for a meaningful time period                                                                                             | N/A                                |
| Other analyses           | 17  | Report other analyses done—eg analyses of subgroups and interactions, and sensitivity analyses                                                                                                               | Qual page 10-12                    |
| <b>Discussion</b>        |     |                                                                                                                                                                                                              |                                    |
| Key results              | 18  | Summarise key results with reference to study objectives                                                                                                                                                     | Page 9, table 3, sup table 2, 4, 5 |
| <b>Limitations</b>       |     |                                                                                                                                                                                                              |                                    |
| Interpretation           | 20  | Give a cautious overall interpretation of results considering objectives, limitations, multiplicity of analyses, results from similar studies, and other relevant evidence                                   | Page 13 and 14                     |
| Generalisability         | 21  | Discuss the generalisability (external validity) of the study results                                                                                                                                        | Page 14                            |
| <b>Other information</b> |     |                                                                                                                                                                                                              |                                    |
| Funding                  | 22  | Give the source of funding and the role of the funders for the present study and, if applicable, for the original study on which the present article is based                                                | Acknowledged page 14               |

\*Give information separately for cases and controls in case-control studies and, if applicable, for exposed and unexposed groups in cohort and cross-sectional studies.

1  
2  
3  
4  
5  
6  
7  
8  
9  
10  
11  
12  
13  
14  
15  
16  
17  
18  
19  
20  
21  
22  
23  
24  
25  
26  
27  
28  
29  
30  
31  
32  
33  
34  
35  
36  
37  
38  
39  
40  
41  
42  
43  
44  
45  
46

**Note:** An Explanation and Elaboration article discusses each checklist item and gives methodological background and published examples of transparent reporting. The STROBE checklist is best used in conjunction with this article (freely available on the Web sites of PLoS Medicine at <http://www.plosmedicine.org/>, Annals of Internal Medicine at <http://www.annals.org/>, and Epidemiology at <http://www.epidem.com/>). Information on the STROBE Initiative is available at [www.strobe-statement.org](http://www.strobe-statement.org).

For peer review only

# BMJ Open

## SafeSpace: What is the feasibility and acceptability of a co-designed virtual reality intervention, incorporating compassionate mind training, to support people undergoing cancer treatment in a clinical setting?

|                                 |                                                                                                                                                                                                                                                                                                                                                                                                                                                                                                                                                                                                                                                                                                                                                                                                                   |
|---------------------------------|-------------------------------------------------------------------------------------------------------------------------------------------------------------------------------------------------------------------------------------------------------------------------------------------------------------------------------------------------------------------------------------------------------------------------------------------------------------------------------------------------------------------------------------------------------------------------------------------------------------------------------------------------------------------------------------------------------------------------------------------------------------------------------------------------------------------|
| Journal:                        | <i>BMJ Open</i>                                                                                                                                                                                                                                                                                                                                                                                                                                                                                                                                                                                                                                                                                                                                                                                                   |
| Manuscript ID                   | bmjopen-2020-047626.R1                                                                                                                                                                                                                                                                                                                                                                                                                                                                                                                                                                                                                                                                                                                                                                                            |
| Article Type:                   | Original research                                                                                                                                                                                                                                                                                                                                                                                                                                                                                                                                                                                                                                                                                                                                                                                                 |
| Date Submitted by the Author:   | 15-Jun-2021                                                                                                                                                                                                                                                                                                                                                                                                                                                                                                                                                                                                                                                                                                                                                                                                       |
| Complete List of Authors:       | O'Gara, Geraldine; Royal Marsden NHS Foundation Trust, Applied Health Research<br>Murray, Lisa; Portsmouth Hospitals NHS Trust, Department of Research and Innovation<br>Georgopoulou, Sofia; Royal Marsden Hospital NHS Trust, Applied Health Research<br>Anstiss, Tim; The Academy for Health Coaching<br>Macquarrie, Andrew; University College London, Department of Computer Science<br>Wheatstone, Pete; Royal Marsden NHS Foundation Trust, Patient and Public Representative<br>Bellman, Barbie; Royal Marsden NHS Foundation Trust, Patient and Public Representative<br>Gilbert, Paul; Derbyshire Healthcare NHS Foundation Trust, Mental Health Research Unit<br>Steed, Anthony; University College London, Department of Computer Science<br>Wiseman, Theresa; The Royal Marsden NHS Foundation Trust |
| <b>Primary Subject Heading</b>: | Oncology                                                                                                                                                                                                                                                                                                                                                                                                                                                                                                                                                                                                                                                                                                                                                                                                          |
| Secondary Subject Heading:      | Health services research, Nursing                                                                                                                                                                                                                                                                                                                                                                                                                                                                                                                                                                                                                                                                                                                                                                                 |
| Keywords:                       | Adult oncology < ONCOLOGY, CHEMOTHERAPY, COMPLEMENTARY MEDICINE, QUALITATIVE RESEARCH                                                                                                                                                                                                                                                                                                                                                                                                                                                                                                                                                                                                                                                                                                                             |
|                                 |                                                                                                                                                                                                                                                                                                                                                                                                                                                                                                                                                                                                                                                                                                                                                                                                                   |

SCHOLARONE™  
Manuscripts





I, the Submitting Author has the right to grant and does grant on behalf of all authors of the Work (as defined in the below author licence), an exclusive licence and/or a non-exclusive licence for contributions from authors who are: i) UK Crown employees; ii) where BMJ has agreed a CC-BY licence shall apply, and/or iii) in accordance with the terms applicable for US Federal Government officers or employees acting as part of their official duties; on a worldwide, perpetual, irrevocable, royalty-free basis to BMJ Publishing Group Ltd ("BMJ") its licensees and where the relevant Journal is co-owned by BMJ to the co-owners of the Journal, to publish the Work in this journal and any other BMJ products and to exploit all rights, as set out in our [licence](#).

The Submitting Author accepts and understands that any supply made under these terms is made by BMJ to the Submitting Author unless you are acting as an employee on behalf of your employer or a postgraduate student of an affiliated institution which is paying any applicable article publishing charge ("APC") for Open Access articles. Where the Submitting Author wishes to make the Work available on an Open Access basis (and intends to pay the relevant APC), the terms of reuse of such Open Access shall be governed by a Creative Commons licence – details of these licences and which [Creative Commons](#) licence will apply to this Work are set out in our licence referred to above.

Other than as permitted in any relevant BMJ Author's Self Archiving Policies, I confirm this Work has not been accepted for publication elsewhere, is not being considered for publication elsewhere and does not duplicate material already published. I confirm all authors consent to publication of this Work and authorise the granting of this licence.

**Title Page**

**Title:** SafeSpace: What is the feasibility and acceptability of a co-designed virtual reality intervention , incorporating compassionate mind training, to support people undergoing cancer treatment in a clinical setting?

**Corresponding Author:**

Geraldine O’Gara  
Applied Health Research Team  
Royal Marsden NHS Foundation Trust  
Fulham Road  
London, UK  
SW3 6JJ  
[Geraldine.O’Gara@rmh.nhs.uk](mailto:Geraldine.O’Gara@rmh.nhs.uk)  
0208 915 4926

**Co Authors:**

Geraldine O’Gara  
Applied Health Research Team  
Royal Marsden NHS Foundation Trust  
London, UK

Lisa Murray  
Department of Research and Innovation  
Portsmouth Hospital NHS Trust  
Portsmouth PO6 3LY, UK

Dr Sofia Georgopoulou  
Applied Health Research Team  
Royal Marsden NHS Foundation Trust  
London, UK

Dr Tim Anstiss  
Founder  
Virtual Health Labs  
UK  
[Tim.Anstiss@virtualhealthlabs.org](mailto:Tim.Anstiss@virtualhealthlabs.org)

Dr Andrew Macquarrie  
Department of Computer Science  
University College London  
London, UK

Mr Pete Wheatstone  
Patient Public Representative  
Royal Marsden/ICR Biomedical Research Centre  
London, UK

Mrs Barbie Bellman

1  
2  
3 Patient Public Representative  
4 Royal Marsden NHS Foundation Trust  
5 London, UK  
6

7  
8 Professor Paul Gilbert  
9 Department of Clinical Psychology  
10 University of Derby  
11 Derby, UK  
12

13  
14 Professor Anthony Steed  
15 Department of Computer Science  
16 University College London  
17 London, UK  
18

19  
20 Professor Theresa Wiseman  
21 Applied Health Research Team  
22 Royal Marsden NHS Foundation Trust  
23 London, UK  
24

25 Word count: 5443  
26  
27  
28  
29  
30  
31  
32  
33  
34  
35  
36  
37  
38  
39  
40  
41  
42  
43  
44  
45  
46  
47  
48  
49  
50  
51  
52  
53  
54  
55  
56  
57  
58  
59  
60

For peer review only

## Article Summary

### Strengths and Limitations of this study

- First study in an oncology setting exploring use of VR to deliver a psychological support intervention.
- Acceptability and feasibility were tested in the oncology setting. Within the evaluation phase, the potential impact of the intervention on psychological, physiological well-being and quality of life was assessed.
- Mixed-methods study: intervention developed using an experience-based co-design approach working with people affected by cancer, alongside qualitative techniques to capture experience of intervention use.
- The intervention consisted of three short sessions per participant. As compassionate mind training is relatively new and has had very limited use in cancer care, participants only received a small dose. This may have limited the overall effect of the intervention.
- This was an acceptability and feasibility project so sample size was small which limits the inferences that can be drawn from this study.

**Abstract:**

Objectives: The SafeSpace study co-designed and tested a virtual reality intervention, incorporating relaxation and compassionate mind-training to determine acceptability/feasibility in an oncology setting and evaluate impact on physical/psychological well-being and quality-of-life.

Design: A two-phase study. Phase 1 determined key characteristics using an Experienced-based Co-Design approach. Phase 2 evaluated the intervention using various measures and qualitative interviews. Descriptive statistics were used to analyse measures data and framework analysis was used to analyse interviews.

Setting: A specialist cancer centre, UK.

Participants: 18 in phase 1; 21 in phase 2. Participants were in cancer treatment, recovery or palliative care.

Primary and secondary outcome: Primary outcome: acceptability of the intervention, assessed by >60% uptake of three sessions. Secondary outcomes: impact on psychological well-being using: EQ-5D/QLQ-C30, Profile of Mood Scale (POMS), Warwick and Edinburgh Mental Well-being scale (WEMWBS), Depression and Anxiety Severity Scale 21 (DASS21), Self-Compassion Scale (SCS), Acceptance and Action Questionnaire (AAQII), and a locally developed questionnaire to capture self-compassion post-use. Physiological impact was assessed by change in heart rate (HR)/heart rate variability (HRV) and electrodermal activity (EDA).

Results: Twenty participants (mean age=48.7 years; SD=16.87); 65% (n=13) completed three sessions. Mental well-being improved following each use and from baseline to after session 3 (VR 1-  $z = 2.846$ ,  $p = < 0.01$ ; VR 2 -  $z = 2.501$ ,  $p = < 0.01$ ; VR 3 -  $z = 2.492$ ,  $p = < 0.01$ ). There was statistically significant difference in mean scores for EDA at mid- and post-session compared to pre-session ( $F(1.658, 4.973) = 13.364$ ,  $p < 0.05$ ). There was statistically significant reduction in stress levels from baseline to post-session 3. Participants found the intervention acceptable and highlighted areas for development.

Conclusion: The intervention is acceptable and feasible, and has shown positive effects on mental well-being/stress in the oncology setting. Larger studies are needed to confirm findings.

Word count: 298

## Background:

The number of people living with cancer is expected to double to four million over the next 20 years. (1). Treatment involves surgery, radiotherapy, chemotherapy or other, alone or in combination. Many treatments have unpleasant side-effects and consequently people may not comply with recommended regimens (2). People affected by cancer (PABC) commonly experience poor psychological wellbeing and poor quality of life (QoL) (3, 4, 5). Some become isolated from friends/family, or are unable to continue working, causing financial difficulties and further isolation (2). At least one in four – around 500,000 people in the UK – face poor health or disability after treatment (1).

### *Virtual Reality*

Virtual reality (VR) is the computer-generated simulation of a three-dimensional image or environment that can be interacted with, or explored, in a way that seems real, by an individual using 3-D glasses, a headset with integrated screen, or gloves with integrated sensors. Healthcare has seen a growth in technologies such as VR to provide support (6). Recently, it has become more affordable and seen a dramatic improvement in user experience (7). It has previously been used in various applications including pain management, multiple sclerosis (8, 9, 10) and treatment of psychological conditions, such as phobias and anxiety (11, 12, 13). Within cancer care, VR has been used to manage pain, anxiety, and symptom distress. However, current literature regarding its effectiveness is equivocal. In a review of 19 studies (14), of those which reported on pain (n=6), half found that VR had a statistically significant positive effect in cancer patients. This was substantiated by other work (15) which reported decreased pain and state anxiety levels post-VR use by women with severe/chronic pain following breast cancer treatment. In contrast, a recent meta-analysis of cancer-related symptom management (16) showed the only statistically significant effect was reduced fatigue levels. Other studies (17, 18) using VR reported positive results as a distraction technique during chemotherapy administration. These were small samples (n=16; n=20 respectively) of women with breast cancer. Subsequent studies of larger, more diverse cohorts reported significant impact on reducing perception of time when receiving chemotherapy, validating the distractive nature of VR (19, 20).

### *Compassion Focused Therapy*

Compassion can be defined as 'the sensitivity to suffering in self and others, with a deep commitment to try to relieve it'. Compassion-focused therapy (CFT) is an integrated, multimodal treatment approach that draws from sociology, psychology, and neuroscience (21). Central to CFT is compassionate mind-training (CMT) which was originally developed for people who find self-warmth and self-acceptance difficult (22; 23). It teaches the skill and practice of training the mind, by inviting people to develop their own images of warmth through practices such as slow and deeper breathing, compassionate voice tones, imagery, and facial expressions (24), and helps people develop self-compassion (22). CMT can be delivered on a one to one or group basis (25; 23). Studies examining other psychological interventions such as Cognitive Behavioural Therapy in a cancer population have shown favourable effects (26), however, this requires specialist training, supervision and certification needs (27), and appropriate training can be complex and costly (28, 29). CMT can be self-administered and once learned, can be recalled in multiple environments including at home (21). CFT and CMT have

1  
2  
3 been shown to reduce suffering and improve QoL in a range of health problems such as  
4 anxiety/depression, eating disorders, phobias and pain management (30, 31, 32, 33) and are becoming  
5 more mainstream and acceptable (34, 35).  
6

7 Whilst effectiveness is equivocal, the application of VR within cancer as a distraction technique is  
8 accepted. However, its use to deliver psychological therapies, such as CMT, remains unexplored. Little  
9 is known about how these treatment approaches might be combined, whether there is any synergistic  
10 effect, and if such an intervention is acceptable and feasible in the clinical environment.  
11  
12

13 **Aim:**

14  
15 To co-design a VR intervention, incorporating CMT, and assess its acceptability and feasibility to  
16 support people undergoing cancer treatment in a clinical setting.  
17  
18  
19  
20  
21

22 Primary outcome: acceptability of the intervention, assessed by >60% uptake of three sessions.

23  
24 Secondary outcomes: impact on psychological well-being using EQ-5D/QLQ-C30, Profile of  
25 Mood Scale (POMS), Warwick and Edinburgh Mental Well-being scale (WEMWBS), Depression  
26 and Anxiety Severity Scale 21 (DASS21), Self-Compassion Scale (SCS), Acceptance and Action  
27 Questionnaire (AAQII), and a locally developed questionnaire to capture self-compassion post-  
28 use. Physiological impact was assessed by change in heart rate (HR)/heart rate variability  
29 (HRV) and electrodermal activity (EDA).  
30  
31  
32  
33

34 **Methods:**

35  
36 This was a two-phased study using mixed-methods and an experience-based co-design (EBCD)  
37 approach. Due to the originality of the intervention, not previously implemented in this setting and  
38 population, this research is deemed an acceptability and feasibility study. EBCD is a method of  
39 participatory research that embeds experience of service users and staff into service design (36).  
40 Phase 1: development of the intervention by co-designing and refining a number of continuously  
41 improved prototypes with PABC. Intervention delivery and evaluation model were also established.  
42 Phase 2: formal acceptability/feasibility and evaluation of the intervention, with PABC, using the range  
43 of psychological, physiological, and QoL measures agreed in Phase 1, and further explored through  
44 qualitative feedback Please see supplementary file flowchart 1 for EBCD process.  
45  
46  
47

48 **Sample:**

49 A convenience sample was used to recruit participants to both phases of the study. Two separate  
50 groups of participants were recruited to either phase; phase 1 participants were no longer in  
51 treatment or follow-up; phase 2 participants were either receiving treatment or were in treatment  
52 follow-up.  
53  
54  
55

56 *Instruments for psychological assessment:*

57 Demographic data collected included age, gender, diagnosis, cancer group, cancer stage and aim of  
58 treatment.  
59  
60

#### The POMS

The POMS (37) examines six mood subscales: tension-anxiety, depression, anger-hostility, vigour, fatigue, and confusion. Total mood disturbance score is computed by adding the five negative subscale scores and subtracting the vigour score. Higher total mood score indicate greater degree of mood disturbance (38). The POMS subscales and total score have demonstrated sound internal consistency reliability ( $\alpha \geq 0.84$ ) (39).

#### The WEMWBS

The WEMWBS (40) is a 14-item scale of mental well-being covering subjective well-being and psychological functioning. It is scored by summing responses to each item on a 1-5 Likert scale. The minimum scale score is 14; maximum is 70. It has been validated in the UK in ages 16+ (41). A non-validated, adapted version, AWEMWBS, was used immediately after each intervention use. The WEMWBS asks participants to describe their experience over the last two weeks. The adapted version asks the participant to describe how they are feeling immediately after the intervention.

#### The AAQII

The AAQII is a seven-item measure of psychological inflexibility, or experiential avoidance. Items are scored on a Likert scale of 1 (never true) to 7 (always true) and are summed up. Higher scores equal greater levels of psychological inflexibility, with proven reliability and validity (42).

#### The SCS

The SCS (43) is a 26-item instrument that measures self-compassion through three hypothesized dimensions with their negative counterparts: self-kindness versus self-judgment, common humanity versus isolation, and mindfulness versus over-identification, according to a 5-point scale (1= Almost Never; 5= Almost Always). Subscale scores are computed by calculating the mean of subscale item responses. To compute the total score, the Self-Kindness, Common Humanity, and Mindfulness are summed with reverse scores of the Self-judgment, Isolation, and Over-identification subscales. Higher scores indicate greater self-compassion. In the original version, the total score showed excellent internal consistency ( $\alpha = .92$ ) and so did the six subscales (range: .75 - .81) (44).

#### The DASS21

The DASS 21 (45) is a 21-item instrument that assesses depression, anxiety and stress. Each seven-item scale has four responses ranging from 0 (did not apply to me at all) to 3 (applied to me much/most of the time). A higher score indicates higher levels of depression, anxiety and stress. The DASS-21 has excellent internal consistency (46), and construct validity (46, 47).

#### The EQ5D-3L

The EQ5D (48) is designed to measure generic health outcome and comprises two parts: the EQ5D-3L self-classifier, a self-reported description of health problems according to five dimensions (mobility, self-care, usual activities, pain/discomfort and anxiety/depression), and the EQ-VAS, a self-rated health status using a visual analogue scale to record perception of current overall health; the scale is graduated from 0 (the worst imaginable health state) to 100 (the best imaginable state). It has been shown to be reliable and valid in cancer populations (49).



### The QLQ-C30

The QLQ-C30 (50) is used to measure general aspects of HRQOL in cancer patients. EORTC QLQ-C30, Version 3, incorporates five functional scales on physical (PF), role (RF), cognitive (CF), emotional (EF) and social (SF) functioning, three symptom scales on fatigue (FA), pain (PA) and nausea and vomiting (NV), single items assessing dyspnoea (DY), insomnia (SL), loss of appetite (AP), constipation (CO) and diarrhoea (DI), one item assessing perceived financial impact (FI) and global health status/QoL scale (Global QoL). Each item is scored in one of four categories 1) 'Not at all', 2) 'A little', 3) 'Quite a bit' 4) 'Very much', with the exception of 'Global QoL'. It has been shown to be reliable and valid in cancer populations (51, 52, 53).

### Locally-developed questionnaire

The locally-developed questionnaire specifically targeted self-compassion after intervention use. It comprised 12 questions such as: 'To what extent did the virtual reality help you have insight into your current situation?' and 'To what extent did the virtual reality make you feel encouraged about the future?' Scored using a 7-item Likert scale ranging from not at all (1) to very much (7), the tool had excellent internal consistency ( $\alpha = 9.44$ ) (54); a higher score indicated that the intervention had a more positive impact.

### *Physiological assessment:*

Physiological assessment was made using heart rate (HR), heart rate variability (HRV) and electrodermal activity (EDA) (55).

### *Procedure:*

Potential participants were identified by clinical teams, and a diverse convenience sample undergoing a range of cancer treatments across tumour types from one specialist centre recruited. Inclusion criteria were: 1) having a diagnosis of cancer; 2) age over 18 years; 3) ability to provide written consent. Exclusion criteria were people: 1) considered too unwell; 2) in who use of VR is not recommended e.g., registered blind, motion sickness (56), seizure disorder or known psychiatric conditions such as schizophrenia or personality disorder (57). Exclusion criteria were assessed by medical records, self-report and in consultation with clinical staff. All procedures were in accordance with the Declaration of Helsinki (1964) and later amendments or comparable ethical standards. Procedure included two phases with two different groups of participants; phase 1 aimed to inform development of the intervention through a series of workshops with patients with previous experience of cancer and treatment. Phase 2 involved the application and evaluation of the intervention in the clinical setting with patients currently in treatment or follow-up, to assess acceptability and feasibility through intervention uptake and user experience. The study was reviewed by a statistician; Phase 1 is purely qualitative. Phase 2 statistical considerations are referred to in the descriptive statistics section.

### Ethical approval:

Ethical approval was acquired from a UK Research Ethics Committee (South Central – Oxford B REC 18/SC/0346) and Health Research Authority (IRAS ID – 241770). Patient and Public involvement was

sought for study design. Eligible participants received written information and gave informed consent before taking part.

#### Patient and Public Involvement:

Patient and public involvement (PPI) was sought, and we recruited two representatives to be members of the study team who further informed the research question and study processes. Both had personal experience of cancer and treatment and previous experience of PPI work as part of a research study. By nature, the experience-based co-design method involved patients in the intervention and evaluation design. The evaluation measures used were selected in collaboration with the patient participants who attended the evaluation workshop, and their burden considered. PPI representatives were not directly involved in participant recruitment. A lay summary of results will be shared with participants via email.

#### Results/findings:

##### *Phase 1 - Intervention Development*

Eleven participants in total took part, please see supplementary table 1. Five workshops, conducted over six months, were facilitated by a research team including experts in VR and CMT, using an EBCD approach. All were digitally recorded and, along with observations collected by two researchers, transcribed and analysed using thematic analysis.

*Initial design workshop* - Seven participants took part, which started with individuals telling their story, challenges along their pathway and what was important to include. Participants were able to try a range of equipment and experiences in a VR demonstration. They were encouraged to share, critique and propose ideas, using the design studio method (58). Analysis of data identified a number of 'touch points', these being what was emotionally most important to participants, which were used to inform the first iteration of the intervention.

*User-testing workshops* - Three user-testing workshops took place in which three/four participants each were invited to try the subsequently developed prototype; a total of 11 participants took part in one or more. Participants were asked about their experience particularly focusing on quality and content of the intervention. Further 'touch points' informed the design of the next iteration, which was refined until the co-design team were satisfied it had been developed to acceptable quality.

#### Findings from Phase 1:

Over the course of the user-testing workshops, the intervention became more refined and focused on detail within, such as recognition of what constitutes a 'safe space', voice quality (e.g. pace/tone), and guidance versus instruction. The themes that emerged which underpinned design of the final specification included: 1) *being given permission to 'step out' of current situation*; 2) *importance of voice*; 3) *need for sign-posting/on-boarding information*; 4) *being able to explore*; 5) *being guided versus being instructed*. The final iteration consisted of three short sessions of VR/CMT. VR 1 allowed participants to get used to being in a VR environment. VR 2 introduced a soothing breathing exercise, and VR 3 introduced a CMT self-compassion exercise. CMT language developing progressively with

each use. A choice of three environments was given: a beach as a 360-degree video, and animated mountain and forest scenes. Professional voiceover actors provided a choice of female or male audio (table 1). It was agreed that the intervention should be offered at any stage of treatment and acknowledged that three sessions may not be sufficient to administer a meaningful 'dose' of CMT, but would be enough to generate preliminary data.

Table 1: Final intervention content

| All sessions approx. 10 minutes long                         |                                                         |                                              |
|--------------------------------------------------------------|---------------------------------------------------------|----------------------------------------------|
| VR1                                                          | VR2                                                     | VR3                                          |
| Choice of male or female voice                               | Choice of male or female voice                          | Choice of male or female voice               |
| Choice of a VR beach, mountain, or forest scene              | Choice of a VR beach, mountain, or forest scene         | Choice of a beach, mountain, or forest scene |
| Adapting to wearing VR headset and being in a VR environment | Simple soothing/breathing exercise, introduction to CMT | Simple CMT exercise                          |

*Evaluation workshop* - A final workshop was held with five participants, who had taken part in either design or testing, to establish an evaluation model. A range of demographic, psychological and physiological measures were reviewed and agreed to be collected at baseline, and pre- and post- each intervention use (see Table 2). The final intervention was delivered on a head-mounted, stand-alone device; this was considered inexpensive and practical.

Table 2: Schedule for study procedure

| Measure                                            |                           | Baseline | Pre each intervention | Post each intervention |
|----------------------------------------------------|---------------------------|----------|-----------------------|------------------------|
| Name/age/gender/dx/tx etc                          | Demographic information   | X        |                       |                        |
| EQ-5D                                              | HRQoL                     | X        | X                     |                        |
| QLQ C30                                            | HRQoL                     | X        |                       | X                      |
| Action and Acceptance Questionnaire II - AAQII     | Psychological flexibility | X        |                       |                        |
| Depression, Anxiety and Stress Scale 21 – DASS21   | Anxiety/depression/stress | X        |                       | X                      |
| Profile of Mood State - POMS                       | Mood                      | X        | X                     | X                      |
| Warwick Edinburgh Mental Well-being Scale - WEMWBS | Mental well-being         | X        | X                     |                        |

|                                                             |                                        |                                                              |  |   |
|-------------------------------------------------------------|----------------------------------------|--------------------------------------------------------------|--|---|
| Self-compassion Scale - SCS                                 | Self-compassion                        | X                                                            |  | X |
| Adapted Warwick Edinburgh Mental Well-being Scale - AWEMWBS | Mental well-being immediate time-point |                                                              |  | X |
| Locally developed questionnaire                             | Self-compassion                        |                                                              |  | X |
| Heart rate/heart rate variation/electrodermal activity      | Physiological                          | Monitored continuously before, during and after intervention |  |   |

### *Phase 2 – Evaluation/acceptability of intervention*

The final intervention was evaluated and tested for acceptability/feasibility. A further twenty-one people were recruited. Four study visits were organised, coinciding with planned appointments, spaced at least a week apart. At initial visit, written consent was obtained and demographic data collected. Participants completed the baseline set of questionnaires relating to psychological state and QoL. The study then proceeded as per table 2. Telephone interviews were conducted once the participant had completed intervention use.

### Quantitative

Summary measures for participant characteristics, VR use data variables and questionnaire scores were presented as means and standard deviations for continuous (approximate), normally distributed variables and frequencies. Categorical variables were reported as percentages. Shapiro-Wilk test was used to confirm normal distribution of continuous summary scales (all p values >0.05). Friedman's test for repeated measures was performed to assess whether there was a statistically significant difference in scores between baseline, VR1, VR2 and VR3. Wilcoxon signed ranks test was used to compare baseline and VR3 session scores. ANOVA was performed to assess changes in EDA, HR and HRV within each session. All p values were two-sided throughout; significance was set at the 5% level. IBM SPSS version 25 was used to analyse the data. Missing data were addressed (see suppl Table 2).

### *Participants*

Seven males and 14 females consented to take part. One participant was subsequently lost to follow-up. Mean age was 48.7 years (SD=16.87; range: 22-77). Mean time elapsed since diagnosis was 37.08 months (SD= 45.00; range: 2-149). 16 participants (80%) were in active treatment. They had various tumour types with gynaecological cancer being most common (N=4; 20%) (See table 3).

**Table 3: Tumour type**

| Tumour Type    | N | %  |
|----------------|---|----|
| Lower GI       | 2 | 10 |
| Haematological | 1 | 5  |
| Gynaecological | 4 | 20 |
| Head and Neck  | 3 | 15 |

|                    |   |    |
|--------------------|---|----|
| Breast             | 3 | 15 |
| Genitourinary (GU) | 3 | 15 |
| Other              | 4 | 20 |

### Acceptability/Feasibility Data

In total, 49 sessions of VR were delivered and completed. Acceptability of the intervention was deemed satisfactory as >60% (N=13; 65%) of participants completed all three sessions. This was agreed by discussion with the statistician, based on evidence which reported attrition levels between 16.9% to 26.0% (59) and reporting drop-out rates of up to 41.4% (60). In addition, dropout rates were reportedly lower among studies that did not include some form of between-session intervention which was the case in the current study (59). Thus, 60% was deemed a safe option for acceptability purposes; and further agreed within the Evaluation Workshop.

Reasons for not completing and further details are displayed in Table 4.

Table 4: Acceptability and feasibility data

|                                                                    | VR1   |     | VR2   |      | VR3   |    |
|--------------------------------------------------------------------|-------|-----|-------|------|-------|----|
|                                                                    | n     | %   | n     | %    | n     | %  |
| <b>No. that took part in VR:</b>                                   | 20    | 100 | 16    | 80   | 13    | 65 |
| <b>No. that did not take part in VR:</b>                           |       |     | 4     | 20   | 7     | 35 |
| <b>Reasons for not completing VR:</b>                              |       |     |       |      |       |    |
| Insufficient time                                                  |       |     | 1     | 25   | 3     | 43 |
| Deterioration in condition                                         |       |     |       |      | 1     | 14 |
| Discontinuation of treatment at site                               |       |     | 1     | 25   | 1     | 14 |
| Adverse effect from VR                                             |       |     |       |      | 1     | 14 |
| Unknown                                                            |       |     | 2     | 50   | 1     | 14 |
| <b>Voice:</b>                                                      |       |     |       |      |       |    |
| Male                                                               | 12    | 60  | 8     | 50   | 6     | 46 |
| Female                                                             | 8     | 40  | 8     | 50   | 7     | 54 |
| <b>Chosen VR environment:</b>                                      |       |     |       |      |       |    |
| Beach                                                              | 12    | 60  | 5     | 31   | 8     | 61 |
| Mountain                                                           | 6     | 30  | 8     | 50   | 5     | 39 |
| Forest                                                             | 2     | 10  | 3     | 19   | 0     | 0  |
| <b>Private room:</b>                                               |       |     |       |      |       |    |
| Yes                                                                | 11    | 55  | 9     | 56   | 8     | 61 |
| No                                                                 | 9     | 45  | 7     | 44   | 5     | 39 |
| <b>Did the participant change the environment whilst using VR?</b> |       |     |       |      |       |    |
| Yes                                                                | 2     | 10  | 0     | 0    | 1     | 8  |
| No                                                                 | 18    | 90  | 16    | 100  | 12    | 92 |
| <b>Did the participant experience external noise?</b>              |       |     |       |      |       |    |
| Yes                                                                | 9     | 45  | 6     | 37.5 | 5     | 38 |
| No                                                                 | 11    | 55  | 10    | 62.5 | 8     | 62 |
| <b>Total time in VR (minutes):</b>                                 |       |     |       |      |       |    |
| Mean                                                               | 10.8  |     | 10.44 |      | 10.00 |    |
| SD                                                                 | 1.852 |     | 2.502 |      | 1.633 |    |
| Range                                                              | 7-15  |     | 7-16  |      | 8-14  |    |

|                                                                        |    |    |    |      |    |     |
|------------------------------------------------------------------------|----|----|----|------|----|-----|
| <b>Did the participant experience any problems with the equipment?</b> |    |    |    |      |    |     |
| <b>No</b>                                                              | 12 |    | 13 |      | 12 |     |
| <b>Yes:</b>                                                            | 8  |    | 3  |      | 1  |     |
| <b>Minor</b>                                                           | 5  |    | 0  |      | 1  |     |
| <b>Additional intervention</b>                                         | 2  |    | 3  |      | 0  |     |
| <b>Unresolvable</b>                                                    | 1  |    | 0  |      | 0  |     |
| <b>Did the participant experience an adverse event?</b>                |    |    |    |      |    |     |
| <b>Yes</b>                                                             | 1  | 5  | 2  | 12.5 | 0  | 0   |
| <b>No</b>                                                              | 19 | 95 | 14 | 87.5 | 13 | 100 |

### *Adverse Events*

Three minor adverse events (AE) were recorded by two participants who experienced mild nausea and dizziness whilst using the intervention. In both, this resolved spontaneously. The third was in one of the same participants but occurred 48 hours after completing VR2. They reported nausea and dizziness for 48 hours resolving with bed-rest. In light of this, they were advised not to undergo the third session.

### **Descriptive Statistics**

Descriptive statistics were computed for all questionnaire scores within respective domains and are presented as frequencies and standard deviations (See Suppl. Table 3). Friedman and Wilcoxon signed ranks tests were performed to compare potential changes in variables between baseline and VR1, VR2 and VR3 sessions. Missing data for each variable is shown in Suppl. Table 4. [Two-sided 95% confidence intervals for the exact percentage can be calculated with maximum +/-23% with a sample size of 20. The proposed sample size of 20 was chosen during the EBCD process mainly for pragmatic reasons and was determined by available resources. A sample size of between 24 and 50 has previously been recommended for pilot and feasibility studies \(61\).](#)

### *Multi-variate Analyses*

#### *Quality of Life*

There were no statistically significant changes in QoL in either the EQ5D-3L or the QLQ-C30 responses (see Suppl. Table 5).

#### *Psychological Measures*

Total mood scores (POMS) were compared pre- and post-intervention. There was a statistically significant increase in total scores after the first session (VR 1) ( $z = -2.136$ ,  $p = 0.03$ ) suggesting there was an improvement in mood. There was improvement in scores post-second session (VR2) but this was not statistically significant (see Suppl. Table 6). Mental well-being (WEMWBS) scores showed statistically significant changes to mental well-being from pre- to post-VR session (VR 1  $z = -2.846$ ,  $p < 0.01$ ; VR 2  $z = -2.501$ ,  $p < 0.01$ ; VR 3  $z = -2.492$ ,  $p < 0.01$ ). There was a consistent beneficial effect maintained throughout all sessions and a statistically significant increase in WEMWBS scores from baseline to VR 3 ( $\chi^2 = 12.905$ ,  $df = 3$ ,  $p = 0.005$ ) (see Suppl. Table 5 & 6).

There was a statistically significant reduction in stress levels as measured by the DASS21 from baseline to post-session 3 ( $z = -2.138^b$ ,  $p = 0.03$ ) (see Suppl. Table 6). While there was a positive and beneficial trend from baseline to post-session 3 (VR3) in most of the sub-scores, none reached statistical significance (see Suppl. Tables 5 & 6).

### Physiological measures

ANOVA were conducted to compare EDA, HR and HRV within each session. A decrease in mean EDA for each of the three sessions was recorded, dropping from pre-intervention level and maintained following removal of headset; this was significant for the first session. Using ANOVA with repeated measures and a Greenhouse-Geisser correction, mean scores for EDA were statistically significantly different at mid- and post-session compared to pre-session levels ( $F(1.658, 4.973) = 13.364$ ,  $p < 0.05$ ). Similarly, the only statistically significant change in HR was in the second session with a decrease from pre- to mid-session followed by a return to pre-session levels at post-session ( $F(1.424, 4.271) = 13.364$ ,  $p < 0.05$ ) (see Suppl. Tables 6a & 6b). No change was observed in HRV.

### *Qualitative findings*

As an acceptability/feasibility study, qualitative feedback was sought to support quantitative results (62). Participants were invited to a semi-structured telephone interview to acquire a deeper understanding of their experience of the intervention use. Eleven participants consented to take part, demographic data is shown in table 5. Interviews were audio-recorded and transcribed. Feedback was also given following each individual use of the intervention; this was summarised and recorded manually by the researcher and analysed alongside interview data using framework analysis (63). The framework was informed by analysis of the first two transcripts which were coded independently by three researchers and themes discussed and agreed. The subsequent interview transcripts and participant comments were analysed using the agreed framework. Three themes emerged: 1) *Practical issues*; 2) *Immersion*; 3) *Impact of intervention*.

Table 5: Demographic information of interview participants

| Age               | Gender           | Diagnosis               |
|-------------------|------------------|-------------------------|
| Mean = 55.5,      | Female: n=6, 55% | Urology: n=3, 27.3%     |
| Range 24-77 years | Male: N=4, 45%   | Gynaecology: n=3, 27.3% |
|                   |                  | Sarcoma: n=2, 18.1%     |
|                   |                  | Bowel: n=1, 9.1%        |
|                   |                  | Lung: n=1, 9.1%         |
|                   |                  | Other: n=1, 9.1%        |

### *Practical Issues:*

1  
2  
3 Participants reported equipment as comfortable and relatively straightforward to use. Clear guidance  
4 was considered important, and a designated room suggested for the future.  
5

6 *'...putting the headset on isn't really a problem ... we're all going to have to get used to some*  
7 *kind of virtual reality at some point ... hadn't tried it before but it was very interesting.'* 012  
8  
9

10 The importance of tailoring to the individual was highlighted:

11  
12 *'I find breathing exercises really frustrating ... I have tumours in my lungs, the amount I can*  
13 *inhale, the amount of time I can hold for is less than for other people. So, someone will say*  
14 *hold it this many beeps and then you can't . . . you feel like you failed at it and you check out*  
15 *...'* 019  
16  
17

18 *Immersion:*

19  
20 This relates to quality of VR imagery, ability to explore, and impact of voices used in the audio. Lack of  
21 quality was seen as negatively impacting immersion and improvement suggested for the future with  
22 a preference for 'real' environments rather than animated:  
23

24 *'The beach was definitely more...realistic, you felt more sort of immersed in . . . compared with*  
25 *the other two.'* 026  
26  
27

28 Whilst there was positive reaction to the professional voices, some participants described becoming  
29 disengaged:  
30

31 *'...I had the final session with the lady [voice], and she was excellent . . . it was very believable.*  
32 *She really did explain it, she was really part of it, and all that. Whereas, I felt with him [male*  
33 *voice], more like that he was reading a script.'* 027  
34  
35

36 Not all participants liked the compassion therapy aspect of the intervention:

37  
38 *'... the compassionate mind therapy, I couldn't see the point of at all . . . you are in a*  
39 *compassion rich environment .... Nurses, the Doctors, friends and family. .. the last thing you*  
40 *.. need is another dose of compassion . . .'* 027  
41  
42

43 There was mixed reaction to external noise; some found it detracted from the quality of experience  
44 but others found it reassuring as it gave awareness of what was going on around them:  
45

46 *'...the noise cancelling was pretty good but I did still hear, if I focused properly, the pump*  
47 *beeping if something went wrong . . . it was sort of the right balance between not being*  
48 *completely disconnected if something happened. I think, anymore and I would have felt too*  
49 *isolated.'* 026  
50  
51

52 *Impact of intervention:*

53  
54 The intervention was seen as having immediate and lasting effects, with some recognising the ability  
55 to replicate the 'safe space' for themselves:  
56  
57  
58  
59  
60



1  
2  
3 *'The breathing techniques, I started to employ when I was having a scan even though the scan*  
4 *was very short. I thought that was quite useful for that. I hadn't really thought of that before*  
5 *but I found it actually quite calming.'* 017  
6  
7

8 For others, the impact was short-lived but still considered useful:

9  
10 *'I don't think it will have a lasting impact...It definitely made the rest of the day easier . . . . But*  
11 *the next day, the day after, I didn't still have that same sense of calm, it was just kind of*  
12 *immediately after...'* 019  
13  
14

15 Participants' past experience of non-medical support measures emerged as relevant to receptiveness  
16 and engagement with the overall VR/CMT experience:

17  
18 *'But I've also been on some of these yoga type things where you just try and relax and get into*  
19 *the mood and all that kind of thing. .. I thought it was quite useful for that. .. the talking was*  
20 *the same.'* 012  
21  
22

23 Participants also gave valuable feedback regarding the research process and informing a larger study,  
24 with particular reference to burden of questionnaires:

25  
26 *'I think some of them were a little bit repetitive, I though the one with all the options about*  
27 *being angry, sad, ... went on for ages. I don't think that really needs to be that long.'* 017  
28  
29  
30  
31  
32  
33  
34  
35  
36  
37  
38  
39  
40  
41  
42  
43  
44  
45  
46  
47  
48  
49  
50  
51  
52  
53  
54  
55  
56  
57  
58  
59  
60

1  
2  
3 Discussion:  
4

5 The aim of the study was to co-design a low-cost VR intervention enabling rapid access to safe, calm  
6 and soothing environments accompanied by quality controlled and guided CMT exercises and assess  
7 acceptability/feasibility in an oncology setting. The intervention was found to be acceptable with  
8 nearly two-thirds of participants completing three sessions, meeting the defined end-point. This was  
9 supported by findings from interview data, confirming participants were positive, and supporting need  
10 for such interventions to help PABC deal with the psychological impact of cancer /treatment. This is  
11 consistent with wider literature in which new technologies were also found to be favourable, in their  
12 case, regardless of age, background or gender (17, 64). Also consistent, it was found to be acceptable  
13 and safe to use across several settings including inpatient, outpatient and day-care (17, 18, 19, 64, 65,  
14 66). Whilst a positive trend was observed in some psychological domains, the overall effectiveness of  
15 the intervention remains unclear.  
16  
17  
18

19 The final version of the intervention consisted of three short, separate sessions of VR/CMT. It is  
20 difficult to determine whether VR or CMT had more effect as arguably patients only received a  
21 relatively small dose of CMT. This was substantiated in interview findings which highlighted that most  
22 participants were unaware of any progression and/or did not relate to the CMT exercises. Participants  
23 thought the intervention should be longer, and incorporate more sessions, to have lasting effect.  
24 Other research in people having chemotherapy (20) argues that VR may not be effective for all as  
25 those with greater symptom distress had more accurate perception of time, suggesting they were not  
26 able to block out negative external cues. In order to effect significant change on individual levels of  
27 self-compassion, more and longer sessions may be required (67). A future multi-arm RCT may explore  
28 which aspect (VR/CMT/ both) has most, if any, effect. Acceptability and feasibility data also showed  
29 the beach scene to be the most popular, and the forest scene the least. This is echoed in other work  
30 that cites a tree environment as gloomy (68) and highlights the importance of choice.  
31  
32  
33  
34  
35

36 Throughout both phases, participants expressed that they liked being able to step out of their situation  
37 into a 'safe space', and some positively described re-imagining the VR environment when they felt  
38 stressed. This happened quickly; for some, it was after the first session. Consistent with other work  
39 (19, 20), participants reported time passed quickly whilst using the intervention suggesting distractive  
40 qualities which may be helpful during lengthy or perceived unpleasant procedures. 'Presence' within  
41 the context of VR has been defined as the "sense of being there", or as the "feeling of being in a world  
42 that exists outside the self" and causes the user to suspend disbelief and believe they are in the virtual  
43 environment, reacting as if they are in the real world (69). This varied between participants, as the  
44 quality of imagery and content of audio were reported by some as detracting from the immersive  
45 experience. It is generally acknowledged that presence is dependent on either the characteristics of  
46 the user and the media employed (70), and relates to willingness to suspend disbelief. Our findings  
47 support this; those who had engaged with psychological therapies previously reported they were less  
48 concerned with the quality of imagery. Arguably, this study engaged an unusual convenience sample  
49 with a mean time since diagnosis of 3 years, of which 80% were still in treatment who potentially may  
50 have been more exposed to such therapies over time. Moving forward, using tools to evaluate the  
51 degree of presence, such as the Presence Questionnaire PQ (71) and perhaps time perception may be  
52 valuable.  
53  
54  
55  
56  
57  
58  
59  
60

1  
2  
3 A key challenge is identifying who might benefit most from VR, alongside who is not appropriate, to  
4 ensure safety. Research (17 18, 19) has highlighted benefits in chemotherapy populations in  
5 particular, with reduction of fatigue, anxiety, symptom distress and perception of time. Contrary to  
6 this, in our study both participants who experienced AEs were undergoing chemotherapy. However,  
7 effects were mild and could not definitively be attributed to the intervention. For one, the effect was  
8 so mild that it was not mentioned at the time, and the other was disappointed not to continue, seeing  
9 the benefit of the VR experience outweighing effect of the AE. Clinical guidance surrounding patient  
10 monitoring during use is recommended.  
11  
12  
13

14 Interesting findings in terms of *secondary* aims emerged; in particular, improvements in mental well-  
15 being and stress. Surprisingly, and consistent with other research (72) we did not see a statistically  
16 significant reduction in anxiety levels as reported in other VR studies in this setting (15, 18). This needs  
17 to be treated with caution as this could be due to use of different measures. Standardisation may  
18 help to make future findings more generalisable/comparable.  
19  
20  
21

22 A strength is the mixed-methods approach: qualitative techniques were employed to capture  
23 experience of intervention use. The majority of studies use tools to capture symptom change (1520,  
24 66) with only one (73) using open-ended questions in their methodology. Further commonalities  
25 included issues surrounding appropriate usage space, and the negative effect of external noise.  
26 Developing the intervention for home use may improve quality and impact of experience.  
27  
28

29 The study has several limitations. The sample size was small (n=21) and the study is potentially  
30 underpowered, with a high attrition rate. However, this number of participants was deemed  
31 appropriate by the EBCD group (who developed the evaluation model) and local statisticians, to assess  
32 the intervention for acceptability, and included a diverse mix of demographics, tumour/treatment  
33 type. The small sample did not allow for adjustment of confounding variables in the quantitative  
34 analysis so that any notable differences in baseline characteristics or response to the intervention in  
35 the study population could be identified. It is acknowledged that a larger sample would be needed  
36 moving forward. Reasons for attrition are noted and may provide intelligence for any future pilot or  
37 larger study. Furthermore, even though the EBCD group designed the evaluation model and chose  
38 measures, interview data highlighted that the quantity were burdensome and repetitive.  
39 Consequently, participants described being unable to give full attention and findings may not be a  
40 true reflection of feelings. Two non-validated tools were used to capture mental wellbeing and  
41 participant self-compassion, and as such may lack consistency and sensitivity.  
42  
43  
44  
45

## 46 **Conclusion**

47  
48 A VR/CMT intervention is acceptable to PABC and is recognized as offering a novel approach to  
49 addressing unmet psychological needs at various stages of the cancer pathway. Whilst feasible/safe  
50 to deliver in the oncology setting, developing a flexible approach in which users can access the  
51 intervention independently e.g. in their own homes, may increase uptake/impact and allow more  
52 autonomy. Future research should focus on conducting larger scale RCT's in which length or frequency  
53 of VR and amount of CMT given would be increased, alongside a bigger sample and a control to  
54 increase generalizability of findings. Careful consideration is required when selecting evaluative  
55 measures  
56  
57  
58  
59  
60

1  
2  
3 Author contributions: TW, GO, LM, TA, AM contributed to study concept and design, data acquisition,  
4 analysis and interpretation; drafting and revising for critically important intellectual content; final  
5 approval of version to be published and accountable for accuracy and integrity. SG contributed to  
6 data analysis and interpretation; drafting and revising for critically important intellectual content; final  
7 approval of version to be published and accountable for accuracy and integrity. PW and BB  
8 contributed to study design, drafting and revising for critically important intellectual content; final  
9 approval of version to be published and accountable for accuracy and integrity. PG and AS contributed  
10 to study concept and design; drafting and revising for critically important intellectual content; final  
11 approval of version to be published and accountable for accuracy and integrity.

12  
13  
14  
15 Funding statement: This work was funded by Macmillan Cancer Support grant number 6488094.  
16 Macmillan Cancer Support approved the final study design and oversaw data collection, analysis and  
17 interpretation as part of the study steering committee. Macmillan Cancer Support also approved the  
18 final report and the decision to submit for publication with BMJ Open.

19  
20  
21 Data availability statement:

22 All data are deidentified participant data. All data are securely stored at the host organisation and  
23 can be made available upon request to the first author.

24  
25  
26 Conflict of interests: None declared. **References**

- 27  
28  
29  
30  
31 1. Maddams J, Brewster D, Gavin A, Steward J, Elliott J, Utley M, Møller H. Cancer prevalence in  
32 the United Kingdom: estimates for 2008. *British journal of cancer*. 2009 Aug;101(3):541-7.
- 33  
34 2. Macmillan (2013) *Throwing light on the consequences of cancer*. [Online] Available at:  
35 [https://www.macmillan.org.uk/documents/aboutus/research/researchandevaluationreport](https://www.macmillan.org.uk/documents/aboutus/research/researchandevaluationreports/throwinglightontheconsequencesofcanceranditstreatment.pdf)  
36 [s/throwinglightontheconsequencesofcanceranditstreatment.pdf](https://www.macmillan.org.uk/documents/aboutus/research/researchandevaluationreports/throwinglightontheconsequencesofcanceranditstreatment.pdf). Accessed Sept 2018
- 37  
38 3. Linden W, Vodermaier A, MacKenzie R, Greig D. Anxiety and depression after cancer diagnosis:  
39 prevalence rates by cancer type, gender, and age. *Journal of affective disorders*. 2012 Dec  
40 10;141(2-3):343-51.
- 41  
42 4. Zajacova A, Dowd JB, Schoeni RF, Wallace RB. Employment and income losses among cancer  
43 survivors: estimates from a national longitudinal survey of American families. *Cancer*. 2015  
44 Dec 15;121(24):4425-32.
- 45  
46 5. Bours MJ, van der Linden BW, Winkels RM, van Duijnhoven FJ, Mols F, van Roekel EH,  
47 Kampman E, Beijer S, Weijenberg MP. Candidate predictors of health-related quality of life of  
48 colorectal cancer survivors: a systematic review. *The oncologist*. 2016 Apr;21(4):433.
- 49  
50 6. Pearce, C. and Haikerwal, M.C., 2010. E-health in Australia: time to plunge into the 21st  
51 century. *Medical Journal of Australia*, 193(7), pp.397-398.
- 52  
53 7. Rakvar. How much do VR headsets cost? [Online]. Available at:  
54 <https://smartglasseshub.com/vr-headset-prices>. Accessed  
55 01.06.2021

- 1
  - 2
  - 3
  - 4
  - 5
  - 6
  - 7
  - 8
  - 9
  - 10
  - 11
  - 12
  - 13
  - 14
  - 15
  - 16
  - 17
  - 18
  - 19
  - 20
  - 21
  - 22
  - 23
  - 24
  - 25
  - 26
  - 27
  - 28
  - 29
  - 30
  - 31
  - 32
  - 33
  - 34
  - 35
  - 36
  - 37
  - 38
  - 39
  - 40
  - 41
  - 42
  - 43
  - 44
  - 45
  - 46
  - 47
  - 48
  - 49
  - 50
  - 51
  - 52
  - 53
  - 54
  - 55
  - 56
  - 57
  - 58
  - 59
  - 60
8. Malloy KM, Milling LS. The effectiveness of virtual reality distraction for pain reduction: a systematic review. *Clinical psychology review*. 2010 Dec 1;30(8):1011-8.
9. .Masseti T, Trevizan IL, Arab C, Favero FM, Ribeiro-Papa DC, de Mello Monteiro CB. Virtual reality in multiple sclerosis—a systematic review. *Multiple sclerosis and related disorders*. 2016 Jul 1;8:107-12.
10. Indovina P, Barone D, Gallo L, Chirico A, De Pietro G, Giordano A. Virtual reality as a distraction intervention to relieve pain and distress during medical procedures. *The Clinical journal of pain*. 2018 Sep 1;34(9):858-77.
11. Rothbaum BO, Hodges LF, Kooper R, Opdyke D, Williford JS, North M. Virtual reality graded exposure in the treatment of acrophobia: A case report. *Behavior therapy*. 1995 Jun 1;26(3):547-54.
12. Rothbaum BO, Hodges L, Smith S, Lee JH, Price L. A controlled study of virtual reality exposure therapy for the fear of flying. *Journal of consulting and Clinical Psychology*. 2000 Dec;68(6):1020.
13. Michaliszyn D, Marchand A, Bouchard S, Martel MO, Poirier-Bisson J. A randomized, controlled clinical trial of in virtuo and in vivo exposure for spider phobia. *Cyberpsychology, Behavior, and Social Networking*. 2010 Dec 1;13(6):689-95.
14. Chirico A, Lucidi F, De Laurentiis M, Milanese C, Napoli A, Giordano A. Virtual reality in health system: beyond entertainment. a mini-review on the efficacy of VR during cancer treatment. *Journal of cellular physiology*. 2016 Feb;231(2):275-87.
15. Mohammad EB, Ahmad M. Virtual reality as a distraction technique for pain and anxiety among patients with breast cancer: A randomized control trial. *Palliative & supportive care*. 2019 Feb;17(1):29-34.
16. Zeng Y, Zhang JE, Cheng AS, Cheng H, Wefel JS. Meta-analysis of the efficacy of virtual reality–based interventions in cancer-related symptom management. *Integrative cancer therapies*. 2019 Aug;18:1534735419871108.
17. Schneider SM, Ellis M, Coombs WT, Shonkwiler EL, Folsom LC. Virtual reality intervention for older women with breast cancer. *CyberPsychology & Behavior*. 2003 Jun 1;6(3):301-7.
18. Schneider SM, Prince-Paul M, Allen MJ, Silverman P, Talaba D. Virtual reality as a distraction intervention for women receiving chemotherapy. In *Oncology nursing forum* 2004 Jan 1 (Vol. 31, No. 1).
19. Schneider SM, Hood LE. Virtual reality: a distraction intervention for chemotherapy. In *Oncology nursing forum* 2007 Jan (Vol. 34, No. 1, p. 39). NIH Public Access.
20. Schneider SM, Kisby CK, Flint EP. Effect of virtual reality on time perception in patients receiving chemotherapy. *Supportive Care in Cancer*. 2011 Apr 1;19(4):555-64.

- 1  
2  
3 21. Gilbert P. An introduction to compassion focused therapy in cognitive behavior therapy. *International Journal of Cognitive Therapy*. 2010 Jun;3(2):97-112.
- 4  
5  
6 22. Gilbert P. Introducing compassion-focused therapy. *Advances in psychiatric treatment*. 2009  
7 May;15(3):199-208.
- 8  
9 23. Gilbert P, Procter S. Compassionate mind training for people with high shame and self-criticism:  
10 Overview and pilot study of a group therapy approach. *Clinical Psychology & Psychotherapy:  
11 An International Journal of Theory & Practice*. 2006 Nov;13(6):353-79.
- 12  
13 24. Matos M, Duarte C, Duarte J, Pinto-Gouveia J, Petrocchi N, Basran J, Gilbert P. Psychological  
14 and physiological effects of compassionate mind training: a pilot randomised controlled study.  
15 *Mindfulness*. 2017 Dec;8(6):1699-712.
- 16  
17 25. Mayhew SL, Gilbert P. Compassionate mind training with people who hear malevolent voices:  
18 A case series report. *Clinical Psychology & Psychotherapy: An International Journal of Theory  
19 & Practice*. 2008 Mar;15(2):113-38.
- 20  
21 26. Jassim GA, Whitford DL, Hickey A, Carter B. Psychological interventions for women with  
22 non-metastatic breast cancer. *Cochrane Database of Systematic Reviews* 2015, Issue 5. Art.  
23 No.: CD008729. DOI: 10.1002/14651858.CD008729.pub2. Accessed 01 June 2021.
- 24  
25 27. Weissman MM, Verdeli H, Gameroff MJ, Bledsoe SE, Betts K, Mufson L, Fitterling H,  
26 Wickramaratne P: National survey of psychotherapy training in psychiatry, psychology,  
27 and social work. *Arch Gen Psychiatry* 2006; 63:925–934
- 28  
29  
30 28. Sholomskas DE, Syracuse-Siewert G, Rounsaville BJ, Ball SA, Nuro KF, Carroll KM: We don't train in  
31 vain: a dissemination trial of three strategies of training clinicians in cognitive-behavioral therapy. *J  
32 Consult Clin Psychol* 2005; 73:106–115 10.
- 33  
34 29. Morgenstern J, Morgan TJ, McCrady BS, Keller DS, Carroll KM: Manual-guided  
35 cognitive-behavioral therapy training: a promising method for disseminating empirically  
36 supported substance abuse treatments to the practice community. *Psychol Addict  
37 Behav* 2001; 15:83–88
- 38  
39 30. Judge L, Cleghorn A, McEwan K, Gilbert P. An exploration of group-based compassion focused  
40 therapy for a heterogeneous range of clients presenting to a community mental health team.  
41 *International Journal of Cognitive Therapy*. 2012 Dec;5(4):420-9.
- 42  
43 31. Leaviss J, Uttley L. Psychotherapeutic benefits of compassion-focused therapy: An early  
44 systematic review. *Psychological medicine*. 2015 Apr;45(5):927-45.
- 45  
46 32. Anstiss T, Passmore J, Gilbert P. Compassion: the essential orientation. *Psychologist*.. 2020  
47 May 1;33:38-42.
- 48  
49 33. Gooding H, Stedmon J, Crix D. 'All these things don't take the pain away but they do help you  
50 to accept it': making the case for compassion-focused therapy in the management of  
51 persistent pain. *British Journal of Pain*. 2020 Feb;14(1):31-41.
- 52  
53 34. Neff KD, Germer CK. A pilot study and randomized controlled trial of the mindful  
54 self-compassion program. *Journal of clinical psychology*. 2013 Jan;69(1):28-44.
- 55  
56  
57  
58  
59  
60

- 1
  - 2
  - 3
  - 4
  - 5
  - 6
  - 7
  - 8
  - 9
  - 10
  - 11
  - 12
  - 13
  - 14
  - 15
  - 16
  - 17
  - 18
  - 19
  - 20
  - 21
  - 22
  - 23
  - 24
  - 25
  - 26
  - 27
  - 28
  - 29
  - 30
  - 31
  - 32
  - 33
  - 34
  - 35
  - 36
  - 37
  - 38
  - 39
  - 40
  - 41
  - 42
  - 43
  - 44
  - 45
  - 46
  - 47
  - 48
  - 49
  - 50
  - 51
  - 52
  - 53
  - 54
  - 55
  - 56
  - 57
  - 58
  - 59
  - 60
35. Kirby JN. Compassion interventions: The programmes, the evidence, and implications for research and practice. *Psychology and Psychotherapy: Theory, Research and Practice*. 2017 Sep;90(3):432-55.
36. Weston C, Soanes L, Chisholm J, Wiseman T. 'Out There': Developing a transition pathway for adolescents and young adults with cancer using Experience-Based Co-Design. *The Journal of Health Design*. 2018 Mar 22;3(1).
37. McNair DM, Lorr M, Droppleman LF. Manual for the profile of mood states (POMS). San Diego: Educational and Industrial Testing Service. 1971.
38. Biehl B, Landauer A. *Das Profile of Mood States (POMS)* Mannheim: 1975
39. Wyrwich, K.W. and Yu, H., 2011. Validation of POMS questionnaire in postmenopausal women. *Quality of Life Research*, 20(7), pp.1111-1121.
40. Tennant R, Hiller L, Fishwick R, Platt S, Joseph S, Weich S, Parkinson J, Secker J, Stewart-Brown S. The Warwick-Edinburgh mental well-being scale (WEMWBS): development and UK validation. *Health and Quality of life Outcomes*. 2007 Dec;5(1):63.
41. Stewart-Brown S, Janmohamed K. Warwick-Edinburgh mental well-being scale. User guide. Version. 2008 Jun;1.
42. Bond FW, Hayes SC, Baer RA, Carpenter KM, Guenole N, Orcutt HK, Waltz T, Zettle RD. Preliminary psychometric properties of the Acceptance and Action Questionnaire-II: A revised measure of psychological inflexibility and experiential avoidance. *Behavior therapy*. 2011 Dec 1;42(4):676-88.
43. Neff KD. The development and validation of a scale to measure self-compassion. *Self and identity*. 2003 Jul 1;2(3):223-50.
44. Cunha M, Xavier A, Castilho P. Understanding self-compassion in adolescents: Validation study of the Self-Compassion Scale. *Personality and Individual Differences*. 2016 Apr 1;93:56-62.
45. Lovibond SH, Lovibond PF. Manual for the depression anxiety stress scales. Sydney: Psychology Foundation; 1995.
46. Henry JD, Crawford JR. The short-form version of the Depression Anxiety Stress Scales (DASS-21): Construct validity and normative data in a large non-clinical sample. *British journal of clinical psychology*. 2005 Jun;44(2):227-39.
47. Page AC, Hooke GR, Morrison DL. Psychometric properties of the Depression Anxiety Stress Scales (DASS) in depressed clinical samples. *British Journal of Clinical Psychology*. 2007 Sep;46(3):283-97.
48. The EuroQol Group (1990) EuroQol – a new facility for the measurement of health-related quality of life. *Health Policy* 16:199–208
49. Kim et al. *Health and Quality of Life Outcomes* (2015) 13:203
50. Aaronson NK, Ahmedzai S, Bergman B, Bullinger M, Cull A, Duez NJ, Filiberti A, Flechtner H, Fleishman SB, de Haes JC, Kaasa S. The European Organization for Research and Treatment of Cancer QLQ-C30: a quality-of-life instrument for use in international clinical trials in oncology. *JNCI: Journal of the National Cancer Institute*. 1993 Mar 3;85(5):365-76.

- 1
  - 2
  - 3
  - 4
  - 5
  - 6
  - 7
  - 8
  - 9
  - 10
  - 11
  - 12
  - 13
  - 14
  - 15
  - 16
  - 17
  - 18
  - 19
  - 20
  - 21
  - 22
  - 23
  - 24
  - 25
  - 26
  - 27
  - 28
  - 29
  - 30
  - 31
  - 32
  - 33
  - 34
  - 35
  - 36
  - 37
  - 38
  - 39
  - 40
  - 41
  - 42
  - 43
  - 44
  - 45
  - 46
  - 47
  - 48
  - 49
  - 50
  - 51
  - 52
  - 53
  - 54
  - 55
  - 56
  - 57
  - 58
  - 59
  - 60
51. Apolone G, Filiberti A, Cifani S, Ruggiata R, Mosconi P. Evaluation of the EORTC QLQ-C30 questionnaire: a comparison with SF-36 Health Survey in a cohort of Italian long-survival cancer patients. *Annals of Oncology*. 1998 May 1;9(5):549-57.
52. Kobayashi K, Takeda F, Teramukai S, Gotoh I, Sakai H, Yoneda S, Noguchi Y, Ogasawara H, Yoshida K. A cross-validation of the European Organization for Research and Treatment of Cancer QLQ-C30 (EORTC QLQ-C30) for Japanese with lung cancer. *European Journal of Cancer*. 1998 May 1;34(6):810-5.
53. Arraras JI, Arias F, Tejedor M, Pruja E, Marcos M, Martínez E, Valerdi J. The EORTC QLQ-C30 (version 3.0) quality of life questionnaire: validation study for Spain with head and neck cancer patients. *Psycho-Oncology: Journal of the Psychological, Social and Behavioral Dimensions of Cancer*. 2002 May;11(3):249-56.
54. Cronbach LJ. Coefficient alpha and the internal structure of tests. *psychometrika*. 1951 Sep 1;16(3):297-334.
55. Dawson ME, Schell AM, Filion DL. The electrodermal system.
56. Nichols S, Patel H. Health and safety implications of virtual reality: a review of empirical evidence. *Appl Ergon* 2002 May;33(3):251-271
57. Cartwright GF. Virtual or real? The mind in cyberspace. *The Futurist* 28(2), 22–26 (1994).
58. Edenspeikermann, 2016. The Design Studio Method. [Online] Available at: <http://www.edenspeikermann.com/insights/working-with-design-studios/>. Accessed 10 Sept 2019
59. Benbow & Anderson. A meta-analysis examination of attrition in virtual reality exposure therapy for anxiety disorders. *Journal of anxiety disorders*, 2019, 61, pp 18-26.
60. Krijn, M., Emmelkamp, P. M. G., Biemond, R., de Wilde de Ligny, C., Schuemie, M. J., & van der Mast, C. A. P. G. (2004). Treatment of acrophobia in virtual reality: The role of immersion and presence. *Behaviour Research & Therapy*, 42(2), 229.
61. Sim J, Lewis M. The size of a pilot study for a clinical trial should be calculated in relation to considerations of precision and efficiency. *Journal of clinical epidemiology*. 2012 Mar 1;65(3):301-8.
62. Bowen DJ, Kreuter M, Spring B, Cofta-Woerpel L, Linnan L, Weiner D, Bakken S, Kaplan CP, Squiers L, Fabrizio C, Fernandez M. How we design feasibility studies. *American journal of preventive medicine*. 2009 May 1;36(5):452-7.
63. Ritchie J and Spencer L (1994) Qualitative data analysis for applied policy research. *Analyzing Qualitative Data*. Edited by: Bryman A, Burgess RG. London: Routledge.
64. Baños RM, Etchemendy E, Castilla D, García-Palacios A, Quero S, Botella C. Positive mood induction procedures for virtual environments designed for elderly people. *Interacting with Computers*. 2012 May 1;24(3):131-8.
65. Espinoza M, Baños RM, García-Palacios A, Cervera JM, Esquerdo G, Barrajon E, Botella C. Promotion of emotional wellbeing in oncology inpatients using VR.
66. Niki K, Okamoto Y, Maeda I, Mori I, Ishii R, Matsuda Y, Takagi T, Uejima E. A novel palliative care approach using virtual reality for improving various symptoms of terminal cancer patients: A preliminary prospective, multicenter study. *Journal of palliative medicine*. 2019 Jun 1;22(6):702-7.



- 1  
2  
3 67. Neff KD, Dahm KA. Self-compassion: What it is, what it does, and how it relates to mindfulness.  
4 InHandbook of mindfulness and self-regulation 2015 (pp. 121-137). Springer, New York, NY.  
5  
6 68. Nikolajsen, L., Lyndgaard, K., Schriver, N.B. and Moller, J.F., 2009. Does audiovisual  
7 stimulation with music and nature sights (MuViCure) reduce pain and discomfort during  
8 placement of a femoral nerve block?. *Journal of PeriAnesthesia Nursing*, 24(1), pp.14-18.  
9  
10 69. Rogers S. Why is presence important for virtual reality? Online. Available at:  
11 <https://www.vrfocus.com/2017/11/why-is-presence-important-for-virtual-reality/> Accessed  
12 November 2019.  
13  
14 70. Lombard M, Ditton T. At the heart of it all: The concept of presence. *Journal of computer-*  
15 *mediated communication*. 1997 Sep 1;3(2):JCMC321.  
16  
17 71. Witmer BG, Singer MJ. Measuring presence in virtual environments: A presence questionnaire.  
18 *Presence*. 1998 Jun;7(3):225-40.  
19  
20 72. Glennon C, McElroy SF, Connelly LM, Lawson LM, Bretches AM, Gard AR, Newcomer LR. Use  
21 of Virtual Reality to Distract From Pain and Anxiety. In *Oncology nursing forum* 2018 Jul 1 (Vol.  
22 45, No. 4).  
23  
24 73. Baños RM, Espinoza M, García-Palacios A, Cervera JM, Esquerdo G, Barrajón E, Botella C. A positive  
25 psychological intervention using virtual reality for patients with advanced cancer in a hospital setting: a  
26 pilot study to assess feasibility. *Supportive Care in Cancer*. 2013 Jan 1;21(1):263-70.  
27  
28  
29  
30  
31  
32  
33  
34  
35  
36  
37  
38  
39  
40  
41  
42  
43  
44  
45  
46  
47  
48  
49  
50  
51  
52  
53  
54  
55  
56  
57  
58  
59  
60

**STUDY SET-UP – Supplementary flowchart 1**

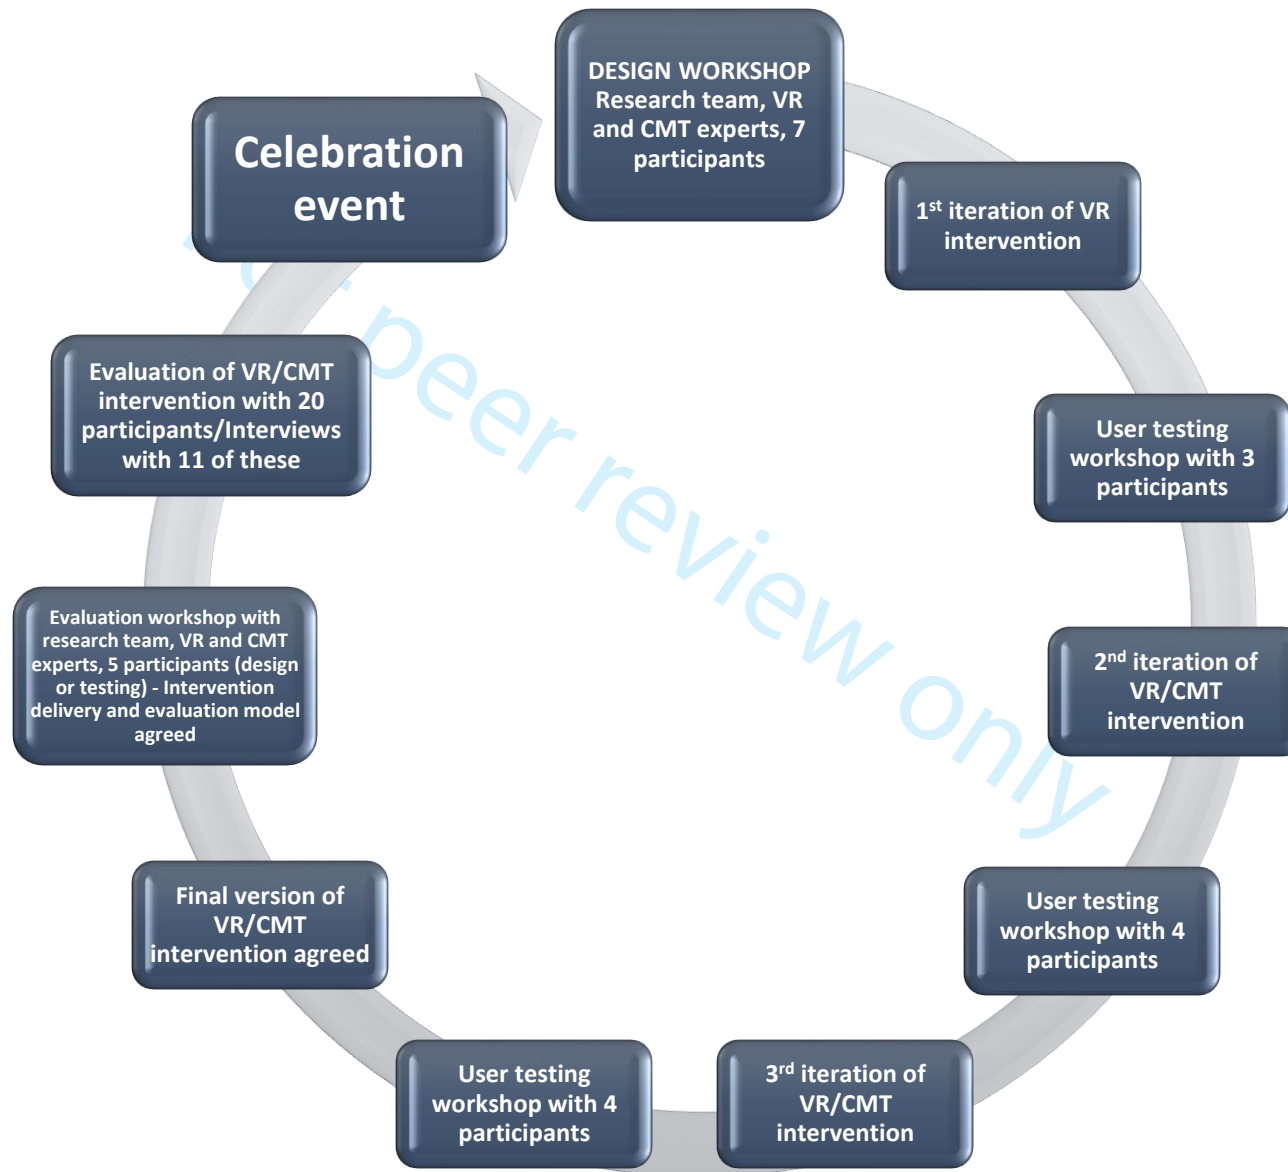

1  
2  
3  
4  
5  
6  
7  
8  
9  
10  
11  
12  
13  
14  
15  
16  
17  
18  
19  
20  
21  
22  
23  
24  
25  
26  
27  
28  
29  
30  
31  
32  
33  
34  
35  
36  
37  
38  
39  
40  
41  
42  
43  
44  
45  
46

## Appendix

## Supplementary tables

| Study no | Gender | Age years | Diagnosis             | Design workshop | User testing workshop 1 | User testing workshop 2 | User testing Workshop 3 | Evaluation workshop |
|----------|--------|-----------|-----------------------|-----------------|-------------------------|-------------------------|-------------------------|---------------------|
| 1        | Male   | 54        | Ca prostate           | Yes             | Yes                     | No                      | Yes                     | Yes                 |
| 2        | Male   | 66        | Melanoma              | Yes             | No                      | No                      | No                      | No                  |
| 3        | Female | 72        | Ca cervix             | Yes             | No                      | Yes                     | No                      | No                  |
| 4        | Female | 67        | Medullary ca          | Yes             | No                      | No                      | Yes                     | Yes                 |
| 5        | Female | 74        | Ca lung               | Yes             | Yes                     | No                      | No                      | Yes                 |
| 6        | Male   | 74        | Neuroendocrine tumour | Yes             | Yes                     | No                      | No                      | No                  |
| 7        | Male   | 69        | Ca prostate           | Yes             | No                      | Yes                     | Yes                     | Yes                 |
| 8        | Male   | 71        | Ca nasopharynx        | No              | No                      | Yes                     | No                      | No                  |
| 9        | Female | 51        | Ca thyroid            | No              | No                      | Yes                     | No                      | Yes                 |
| 10       | Female | 37        | Scg tongue            | No              | No                      | No                      | No                      | No                  |
| 11       | Female | 62        | Ca breast             | No              | No                      | No                      | Yes                     | No                  |

Supplementary table 1: Phase 1 participant demographic data

Supplementary Table 2: Missing data management

| Questionnaire       | Variable measured                      | Missing Data                                                             | Statistical test            |
|---------------------|----------------------------------------|--------------------------------------------------------------------------|-----------------------------|
| EQ-5D – 3D          | QoL                                    | No computation if values missing as single scores                        |                             |
| QLQ-C30             | QoL                                    | Values computed if < or = 10% data missing. Calculated mean for subscore |                             |
| DASS-21             | Depression, Anxiety, Stress            |                                                                          | Friedman (missing listwise) |
| AAQ II              | Psychological flexibility              |                                                                          | Friedman (missing listwise) |
| POMs                | Mood state                             |                                                                          | Friedman (missing listwise) |
| SCS                 | Self-compassion                        |                                                                          | Friedman (missing listwise) |
| WEBWBS/Ad<br>WEMWBS | Mental well-being                      |                                                                          | Friedman (missing listwise) |
| Locally developed Q | Self-compassion after intervention use |                                                                          | Friedman (missing listwise) |

**Supplementary Table 3: Descriptive Statistics Questionnaire Domain Scores**

| QUESTIONNAIRES & DOMAINS                       | N  | Mean   | Std. Dev. | Min    | Max    |
|------------------------------------------------|----|--------|-----------|--------|--------|
| <b>EQ-5D-5L</b>                                |    |        |           |        |        |
| <b>MOBILITY</b>                                |    |        |           |        |        |
| B_EQ5DM                                        | 12 | 1.33   | .49       | 1      | 2      |
| VR1_EQ5DM                                      | 12 | 1.33   | .49       | 1      | 2      |
| VR2_EQ5DM                                      | 12 | 1.33   | .49       | 1      | 2      |
| VR3_EQ5DM                                      | 12 | 1.33   | .49       | 1      | 2      |
| <b>SELF-CARE</b>                               |    |        |           |        |        |
| B_EQ5DSC                                       | 12 | 1.25   | .45       | 1      | 2      |
| VR1_EQ5DSC                                     | 12 | 1.25   | .45       | 1      | 2      |
| VR2_EQ5DSC                                     | 12 | 1.17   | .39       | 1      | 2      |
| VR3_EQ5DSC                                     | 12 | 1.17   | .39       | 1      | 2      |
| <b>USUAL ACTIVITIES</b>                        |    |        |           |        |        |
| B_EQ5DUA                                       | 12 | 1.58   | .52       | 1      | 2      |
| VR1_EQ5DUA                                     | 12 | 1.58   | .52       | 1      | 2      |
| VR2_EQ5DUA                                     | 12 | 1.42   | .52       | 1      | 2      |
| VR3_EQ5DUA                                     | 12 | 1.42   | .52       | 1      | 2      |
| <b>PAIN &amp; DISCOMFORT</b>                   |    |        |           |        |        |
| B_EQ5DPD                                       | 12 | 1.50   | .67       | 1      | 3      |
| VR1_EQ5DPD                                     | 12 | 1.58   | .67       | 1      | 3      |
| VR2_EQ5DPD                                     | 12 | 1.33   | .49       | 1      | 2      |
| VR3_EQ5DPD                                     | 12 | 1.67   | .65       | 1      | 3      |
| <b>ANXIETY &amp; DEPRESSION</b>                |    |        |           |        |        |
| B_EQ5DAD                                       | 12 | 1.42   | .52       | 1      | 2      |
| VR1_EQ5DAD                                     | 12 | 1.42   | .52       | 1      | 2      |
| VR2_EQ5DAD                                     | 12 | 1.42   | .52       | 1      | 2      |
| VR3_EQ5DAD                                     | 12 | 1.42   | .67       | 1      | 3      |
| <b>BAROMETER / VAS</b>                         |    |        |           |        |        |
| B_BAROMETER                                    | 12 | 71.83  | 15.30     | 50     | 100    |
| VR1_BAROMETER                                  | 12 | 71.00  | 15.09     | 50     | 100    |
| VR2_BAROMETER                                  | 12 | 72.17  | 16.68     | 40     | 100    |
| VR3_BAROMETER                                  | 12 | 67.50  | 20.62     | 29     | 100    |
| <b>QLQ C30 – EORTC QoL</b>                     |    |        |           |        |        |
| <b>GLOBAL HEALTH SCORE</b>                     |    |        |           |        |        |
| BQLQC30GHS                                     | 11 | -43.18 | 25.77     | -83.33 | -8.33  |
| VR1QLQC30GHS                                   | 11 | -43.94 | 22.39     | -83.33 | -8.33  |
| VR2QLQC30GHS                                   | 11 | -48.48 | 23.51     | -83.33 | -16.67 |
| VR3QLQC30GHS                                   | 11 | -48.48 | 23.81     | -83.33 | -16.67 |
| <b>FUNCTIONAL SCALE</b>                        |    |        |           |        |        |
| BQLQC30FS                                      | 11 | 7.07   | 24.05     | -42.22 | 33.33  |
| VR1QLQC30FS                                    | 11 | 4.44   | 23.83     | -42.22 | 33.33  |
| VR2QLQC30FS                                    | 11 | 7.47   | 24.10     | -44.44 | 33.33  |
| VR3QLQC30FS                                    | 11 | 7.27   | 24.93     | -46.67 | 33.33  |
| <b>SYMPTOM SCORE</b>                           |    |        |           |        |        |
| BQLQC30SS                                      | 11 | 10.02  | 21.13     | -35.90 | 30.77  |
| VR1QLQC30SS                                    | 11 | 8.39   | 20.13     | -35.90 | 30.77  |
| VR2QLQC30SS                                    | 11 | 10.26  | 21.54     | -43.59 | 33.33  |
| VRQLQC30SS                                     | 11 | 10.02  | 21.62     | -43.59 | 33.33  |
| <b>DASS21 – DEPRESSION, ANXIETY, STRESS 21</b> |    |        |           |        |        |
| <b>DEPRESSION</b>                              |    |        |           |        |        |
| BDASDEP                                        | 11 | 9.09   | 9.01      | 0      | 28     |
| VR1DASDEP                                      | 11 | 8.91   | 9.05      | 0      | 28     |
| VR2DASDEP                                      | 11 | 8.73   | 8.40      | 0      | 24     |
| VR3DASDEP                                      | 11 | 6.91   | 7.34      | 0      | 18     |
| <b>ANXIETY</b>                                 |    |        |           |        |        |
| BDASANX                                        | 10 | 8.00   | 8.79      | 0      | 30     |

|    |                                                         |    |       |       |      |      |
|----|---------------------------------------------------------|----|-------|-------|------|------|
| 1  |                                                         |    |       |       |      |      |
| 2  |                                                         |    |       |       |      |      |
| 3  | VR1DASANX                                               | 10 | 6.60  | 5.82  | 0    | 16   |
| 4  | VR2DASANX                                               | 10 | 7.40  | 6.33  | 0    | 18   |
| 5  | VR3DASANX                                               | 10 | 4.60  | 3.53  | 0    | 10   |
| 6  | <b>STRESS</b>                                           |    |       |       |      |      |
| 7  | BDASSTRS                                                | 19 | 13.37 | 8.11  | 0    | 28   |
| 8  | BDASDEP                                                 | 19 | 7.68  | 8.41  | 0    | 28   |
| 9  | BDASANX                                                 | 18 | 7.89  | 7.62  | 0    | 30   |
| 10 | VR3DASSTRS                                              | 13 | 8.15  | 7.89  | 0    | 24   |
| 11 | VR3DASDEP                                               | 12 | 6.67  | 7.05  | 0    | 18   |
| 12 | VR3DASANX                                               | 11 | 4.36  | 3.44  | 0    | 10   |
| 13 | <b>AAQ – ACTION &amp; ACCEPTANCE QUESTIONNAIRE</b>      |    |       |       |      |      |
| 14 | BTOTAAQ                                                 | 12 | 18.75 | 9.30  | 7    | 41   |
| 15 | VR1TAAQ                                                 | 12 | 19.25 | 8.85  | 7    | 39   |
| 16 | VR2TAAQ                                                 | 12 | 21.08 | 10.80 | 7    | 43   |
| 17 | VR3TAAQ                                                 | 12 | 18.08 | 9.06  | 7    | 39   |
| 18 | <b>POMS – PROFILE OF MOOD STATE</b>                     |    |       |       |      |      |
| 19 | VR1PREPOM                                               | 19 | 20.42 | 5.79  | 12   | 36   |
| 20 | VR2PREPOMS                                              | 16 | 21.50 | 7.14  | 9    | 39   |
| 21 | VR3PREPOMS                                              | 13 | 23.62 | 6.97  | 17   | 36   |
| 22 | VR1POSTPOM                                              | 18 | 23.06 | 6.91  | 8    | 36   |
| 23 | VR2POSTPOM                                              | 13 | 22.38 | 4.25  | 16   | 31   |
| 24 | VR3POSTPOM                                              | 13 | 23.31 | 6.74  | 17   | 39   |
| 25 | <b>SCS – SELF-COMPASSION SCALE</b>                      |    |       |       |      |      |
| 26 | <b>SELF-KINDNESS</b>                                    |    |       |       |      |      |
| 27 | BSCSSK                                                  | 10 | 3.14  | .811  | 2.00 | 4.40 |
| 28 | VR1SCSSK                                                | 10 | 3.14  | .79   | 2.00 | 4.20 |
| 29 | VR2SCSSK                                                | 10 | 3.26  | .92   | 1.8  | 5.0  |
| 30 | VR3SCSSK                                                | 10 | 3.30  | 1.13  | 1.8  | 5.0  |
| 31 | <b>SELF-JUDGEMENT</b>                                   |    |       |       |      |      |
| 32 | BSCSSJ                                                  | 10 | 3.48  | 1.05  | 1.40 | 4.80 |
| 33 | VR1SCSSJ                                                | 10 | 3.48  | 1.05  | 1.40 | 4.80 |
| 34 | VR2SCSSJ                                                | 10 | 3.34  | 1.30  | 1.0  | 5.0  |
| 35 | VR3SCSSJ                                                | 10 | 3.50  | 1.14  | 1.6  | 5.0  |
| 36 | <b>COMMON HUMANITY</b>                                  |    |       |       |      |      |
| 37 | BSCSCH                                                  | 10 | 3.13  | .68   | 2.25 | 4.25 |
| 38 | VR1SCSCH                                                | 10 | 3.23  | .79   | 2.25 | 4.75 |
| 39 | VR2SCSCH                                                | 10 | 2.90  | 1.12  | 1.25 | 4.50 |
| 40 | VR3SCSCH                                                | 10 | 3.15  | 1.04  | 1.50 | 5.00 |
| 41 | <b>ISOLATION</b>                                        |    |       |       |      |      |
| 42 | BSCSISO                                                 | 10 | 3.30  | 1.14  | 1.75 | 5.00 |
| 43 | VR1SCSISO                                               | 10 | 3.38  | 1.13  | 1.75 | 5.00 |
| 44 | VR2SCSISO                                               | 10 | 3.43  | 1.13  | 1.75 | 5.00 |
| 45 | VR3SCSISO                                               | 10 | 3.58  | 1.24  | 1.50 | 5.00 |
| 46 | <b>MINDFULNESS</b>                                      |    |       |       |      |      |
| 47 | BSCSM                                                   | 10 | 4.10  | .74   | 3    | 5    |
| 48 | VR1SSCSM                                                | 10 | 4.05  | .64   | 2.75 | 5.00 |
| 49 | VR2SSCSM                                                | 10 | 3.73  | .76   | 2.75 | 5.00 |
| 50 | VR3SSCSM                                                | 10 | 3.75  | .82   | 2.75 | 5.00 |
| 51 | <b>OVER-IDENTIFIED</b>                                  |    |       |       |      |      |
| 52 | BSCSOI                                                  | 10 | 3.30  | 1.12  | 1.50 | 5.00 |
| 53 | VR1SCSOI                                                | 10 | 3.35  | 1.14  | 1.50 | 5.00 |
| 54 | VR2SCSOI                                                | 10 | 3.70  | 1.26  | 1.50 | 5.00 |
| 55 | VR3SCSOI                                                | 10 | 3.58  | 1.24  | 1.50 | 5.00 |
| 56 | <b>LDL – LOCALLY DEVELOPED QUESTIONS</b>                |    |       |       |      |      |
| 57 | VR1LDQTS                                                | 12 | 51.08 | 15.92 | 33   | 80   |
| 58 | VR2LDQTS                                                | 12 | 50.67 | 14.75 | 36   | 77   |
| 59 | VR3LDQTS                                                | 12 | 50.50 | 17.42 | 14   | 77   |
| 60 | <b>WEMWBS WARWICK-EDINBURGH MENTAL WELL-BEING SCALE</b> |    |       |       |      |      |

|                                                                   |    |       |       |    |    |
|-------------------------------------------------------------------|----|-------|-------|----|----|
| BWEMTS                                                            | 19 | 48.74 | 8.92  | 34 | 67 |
| VR1TWEWM                                                          | 19 | 48.58 | 9.17  | 34 | 67 |
| VR2WEMWTS                                                         | 15 | 48.13 | 9.48  | 37 | 70 |
| VR3WEMWTS                                                         | 13 | 49.46 | 10.44 | 39 | 70 |
| <b>AWEMWBS – ADAPTED WARWICK-EDINBURGH METAL WELL-BEING SCALE</b> |    |       |       |    |    |
| VR1TAWEM                                                          | 18 | 53.00 | 8.24  | 36 | 70 |
| 2AWEMTS                                                           | 14 | 54.43 | 12.64 | 37 | 85 |
| VR3AWEMTS                                                         | 13 | 52.69 | 8.98  | 39 | 70 |
| BWEMTS                                                            | 12 | 45.92 | 7.76  | 34 | 58 |
| VR1TAWEM                                                          | 12 | 51.67 | 8.66  | 36 | 70 |
| 2AWEMTS                                                           | 12 | 54.00 | 13.52 | 37 | 85 |
| VR3AWEMTS                                                         | 12 | 52.83 | 9.36  | 39 | 70 |

For peer review only

Supplementary table 4: Number of missing variables (number of participants)

| Measure                                                     | Baseline | VR1              | VR1               | VR2              | VR2               | VR3              | VR3               |
|-------------------------------------------------------------|----------|------------------|-------------------|------------------|-------------------|------------------|-------------------|
|                                                             |          | Pre intervention | Post intervention | Pre intervention | Post intervention | Pre intervention | Post intervention |
| EQ-5D                                                       | 0        | 0                | N/A               | 0                | N/A               | 0                | N/A               |
| QLQ C30                                                     | 0        | 0                | N/A               | 2(2)             | N/A               | 0                | N/A               |
| Action and Acceptance Questionnaire II - AAQII              | 0        | 0                | N/A               | 4(2)             | N/A               | 0                | N/A               |
| Depression, Anxiety and Stress Scale 21 – DASS21            | 7(3)     | 8(2)             | N/A               | 2(2)             | N/A               | 14(2)            | N/A               |
| Profile of Mood State - POMS                                | 6 (2)    | 8(3)             | 5(3)              | 9(3)             | 6(2)              | 1                | 2(2)              |
| Warwick Edinburgh Mental Well-being Scale - WEMWBS          | 1        | 2(1)             |                   | 0                | N/A               | 0                |                   |
| Self-compassion Scale - SCS                                 | 23 (1)   | 2(1)             | N/A               | 0                | N/A               | 0                | N/A               |
| Adapted Warwick Edinburgh Mental Well-being Scale - AWEMWBS | N/A      | N/A              | 0                 | N/A              | 0                 | N/A              | 1                 |
| Locally developed questionnaire                             | N/A      | N/A              | 0                 | N/A              | 1                 | N/A              | 0                 |



**Supplementary Table 5:** Multivariate analyses comparing baseline, VR1, VR2 and VR3 session scores

Friedman Test for EQ-5D-5L, QLQ C30 EORTC, DASS21, AAQ, SCS, LDQ, WEMWBS, AWEMWBS and Heart Rate Variation

| Ranks               |        |                     |        |                     |        |                     |        |
|---------------------|--------|---------------------|--------|---------------------|--------|---------------------|--------|
| Domain              | M Rank |
| B_EQ5DM             | 2.50   | B_EQ5DSC            | 2.58   | B_EQ5DUA            | 2.67   | B_EQ5DPD            | 2.46   |
| VR1_EQ5DM           | 2.50   | VR1_EQ5DSC          | 2.58   | VR1_EQ5DUA          | 2.67   | VR1_EQ5DPD          | 2.63   |
| VR2_EQ5DM           | 2.50   | VR2_EQ5DSC          | 2.42   | VR2_EQ5DUA          | 2.33   | VR2_EQ5DPD          | 2.13   |
| VR3_EQ5DM           | 2.50   | VR3_EQ5DSC          | 2.42   | VR3_EQ5DUA          | 2.33   | VR3_EQ5DPD          | 2.79   |
| <b>N</b>            | 12     | <b>N</b>            | 12     | <b>N</b>            | 12     | <b>N</b>            | 12     |
| <b>Chi-Square</b>   | .000   | <b>Chi-Square</b>   | 2.000  | <b>Chi-Square</b>   | 6.000  | <b>Chi-Square</b>   | 5.526  |
| <b>df</b>           | 3      | <b>df</b>           | 3      | <b>df</b>           | 3      | <b>df</b>           | 3      |
| <b>Asymp. Sign.</b> | 1.000  | <b>Asymp. Sign.</b> | .572   | <b>Asymp. Sign.</b> | .112   | <b>Asymp. Sign.</b> | .137   |
| Domain              | M Rank |
| B_EQ5DAD            | 2.50   | B_BAROMETER         | 2.63   | BQLQC30GHS          | 2.82   |                     |        |
| VR1_EQ5DAD          | 2.50   | VR1_BAROMETER       | 2.42   | VR1QLQC30GHS        | 2.82   |                     |        |
| VR2_EQ5DAD          | 2.50   | VR2_BAROMETER       | 2.67   | VR2QLQC30GHS        | 2.27   |                     |        |
| VR3_EQ5DAD          | 2.50   | VR3_BAROMETER       | 2.29   | VR3QLQC30GHS        | 2.09   |                     |        |
| <b>N</b>            | 12     | <b>N</b>            | 12     | <b>N</b>            | 11     |                     |        |
| <b>Chi-Square</b>   | .000   | <b>Chi-Square</b>   | .880   | <b>Chi-Square</b>   | 4.935  |                     |        |
| <b>df</b>           | 3      | <b>df</b>           | 3      | <b>df</b>           | 3      |                     |        |
| <b>Asymp. Sign.</b> | 1.000  | <b>Asymp. Sign.</b> | .830   | <b>Asymp. Sign.</b> | .177   |                     |        |
| Domain              | M Rank |
| BQLQC30FS           | 2.41   | BQLQC30SS           | 2.64   | BDASDEP             | 2.59   |                     |        |
| VR1QLQC30FS         | 2.18   | VR1QLQC30SS         | 2.00   | VR1DASDEP           | 2.45   |                     |        |
| VR2QLQC30FS         | 2.64   | VR2QLQC30SS         | 2.77   | VR2DASDEP           | 2.59   |                     |        |
| VR3QLQC30FS         | 2.77   | VRQLQC30SS          | 2.59   | VR3DASDEP           | 2.36   |                     |        |
| <b>N</b>            | 11     | <b>N</b>            | 11     | <b>N</b>            | 11     |                     |        |
| <b>Chi-Square</b>   | 1.709  | <b>Chi-Square</b>   | 3.000  | <b>Chi-Square</b>   | .365   |                     |        |
| <b>df</b>           | 3      | <b>df</b>           | 3      | <b>df</b>           | 3      |                     |        |
| <b>Asymp. Sign.</b> | .635   | <b>Asymp. Sign.</b> | .392   | <b>Asymp. Sign.</b> | .947   |                     |        |
| Domain              | M Rank |
| BDASANX             | 2.75   | BDASSTRS            | 2.96   | BTOTAAQ             | 2.38   |                     |        |
| VR1DASANX           | 2.50   | VR1DASSTRS          | 2.92   | VR1TAAQ             | 2.63   |                     |        |
| VR2DASANX           | 2.80   | VR2DASSTRS          | 2.38   | VR2TAAQ             | 3.04   |                     |        |
| VR3DASANX           | 1.95   | VR3DASSTRS          | 1.75   | VR3TAAQ             | 1.96   |                     |        |
| <b>N</b>            | 10     | <b>N</b>            | 12     | <b>N</b>            | 12     |                     |        |
| <b>Chi-Square</b>   | 4.789  | <b>Chi-Square</b>   | 8.656  | <b>Chi-Square</b>   | 5.742  |                     |        |
| <b>df</b>           | 3      | <b>df</b>           | 3      | <b>df</b>           | 3      |                     |        |
| <b>Asymp. Sign.</b> | .188   | <b>Asymp. Sign.</b> | .034   | <b>Asymp. Sign.</b> | .125   |                     |        |
| Domain              | M Rank |
| BSCSSK              | 2.50   | BSCSSJ              | 2.25   | BSCSCH              | 2.25   |                     |        |
| VR1SCSSK            | 2.45   | VR1SCSSJ            | 2.25   | VR1SCSCH            | 2.65   |                     |        |
| VR2SCSSK            | 2.30   | VR2SCSSJ            | 2.60   | VR2SCSCH            | 2.40   |                     |        |
| VR3SCSSK            | 2.75   | VR3SCSSJ            | 2.90   | VR3SCSCH            | 2.70   |                     |        |
| <b>N</b>            | 10     | <b>N</b>            | 10     | <b>N</b>            | 10     |                     |        |
| <b>Chi-Square</b>   | .733   | <b>Chi-Square</b>   | 2.133  | <b>Chi-Square</b>   | .976   |                     |        |
| <b>df</b>           | 3      | <b>df</b>           | 3      | <b>df</b>           | 3      |                     |        |
| <b>Asymp. Sign.</b> | .866   | <b>Asymp. Sign.</b> | .545   | <b>Asymp. Sign.</b> | .807   |                     |        |
| Domain              | M Rank |
| BSCSISO             | 2.20   | BSCSM               | 2.90   | BSCSOI              | 2.05   |                     |        |
| VR1SCSISO           | 2.40   | VR1SSCSM            | 2.90   | VR1SCSOI            | 2.25   |                     |        |
| VR2SCSISO           | 2.75   | VR2SSCSM            | 2.05   | VR2SCSOI            | 2.95   |                     |        |
| VR3SCSISO           | 2.65   | VR3SSCSM            | 2.15   | VR3SCSOI            | 2.75   |                     |        |
| <b>N</b>            | 10     | <b>N</b>            | 10     | <b>N</b>            | 10     |                     |        |
| <b>Chi-Square</b>   | 2.018  | <b>Chi-Square</b>   | 5.230  | <b>Chi-Square</b>   | 4.417  |                     |        |
| <b>df</b>           | 3      | <b>df</b>           | 3      | <b>df</b>           | 3      |                     |        |

1  
2  
3  
4  
5  
6  
7  
8  
9  
10  
11  
12  
13  
14  
15  
16  
17  
18  
19  
20  
21  
22  
23  
24  
25  
26  
27  
28  
29  
30  
31  
32  
33  
34  
35  
36  
37  
38  
39  
40  
41  
42  
43  
44  
45  
46  
47  
48  
49  
50  
51  
52  
53  
54  
55  
56  
57  
58  
59  
60

|                     |               |                     |               |                     |               |
|---------------------|---------------|---------------------|---------------|---------------------|---------------|
| <b>Asymp. Sign.</b> | .569          | <b>Asymp. Sign.</b> | .156          | <b>Asymp. Sign.</b> | .220          |
| <b>Domain</b>       | <b>M Rank</b> | <b>Domain</b>       | <b>M Rank</b> | <b>Domain</b>       | <b>M Rank</b> |
| VR1LDQTS            | 2.13          | BWEMTS              | 1.38          | VR1 HRV Pre         | 2.00          |
| VR2LDQTS            | 1.83          | VR1TAWEM            | 2.75          | VR1 HRV Mid         | 2.00          |
| VR3LDQTS            | 2.04          | 2AWEMTS             | 2.83          | VR1 HRV Post        | 2.00          |
| VR1LDQTS            | 2.13          | VR3AWEMTS           | 3.04          | VR1 HRV Pre         | 2.00          |
| <b>N</b>            | 12            | <b>N</b>            | 12            | <b>N</b>            | 3             |
| <b>Chi-Square</b>   | .565          | <b>Chi-Square</b>   | 12.905        | <b>Chi-Square</b>   | .000          |
| <b>df</b>           | 2             | <b>df</b>           | 3             | <b>df</b>           | 2             |
| <b>Asymp. Sign.</b> | .754          | <b>Asymp. Sign.</b> | .005          | <b>Asymp. Sign.</b> | 1.000         |

For peer review only

**Supplementary Table 6: Multi-variate analyses comparing baseline to VR3 session scores**

Wilcoxon Signed Ranks Test for DASS21, AAQ, WEMWBS &amp; AWEMWBS, POMS and SSC

| <b>DASS21</b>                 |                                   | <b>N</b>                           | <b>Mean Rank</b>                   | <b>Sum of Ranks</b> |
|-------------------------------|-----------------------------------|------------------------------------|------------------------------------|---------------------|
| <b>VR3DASSTRS - BDASSTRS</b>  | Negative Ranks                    | 9 <sup>a</sup>                     | 6.33                               | 57.00               |
|                               | Positive Ranks                    | 2 <sup>b</sup>                     | 4.50                               | 9.00                |
|                               | Ties                              | 2 <sup>c</sup>                     |                                    |                     |
|                               | Total                             | 13                                 |                                    |                     |
| <b>VR3DASDEP - BDASDEP</b>    | Negative Ranks                    | 5 <sup>d</sup>                     | 5.20                               | 26.00               |
|                               | Positive Ranks                    | 4 <sup>e</sup>                     | 4.75                               | 19.00               |
|                               | Ties                              | 3 <sup>f</sup>                     |                                    |                     |
|                               | Total                             | 12                                 |                                    |                     |
| <b>VR3DASANX - BDASANX</b>    | Negative Ranks                    | 5 <sup>g</sup>                     | 3.00                               | 15.00               |
|                               | Positive Ranks                    | 0 <sup>h</sup>                     | .00                                | .00                 |
|                               | Ties                              | 6 <sup>i</sup>                     |                                    |                     |
|                               | Total                             | 11                                 |                                    |                     |
| <b>Test statistics</b>        |                                   |                                    |                                    |                     |
|                               | <b>VR3DASSTRS -<br/>BDASSTRS</b>  | <b>VR3DASDEP -<br/>BDASDEP</b>     | <b>VR3DASANX -<br/>BDASANX</b>     |                     |
| <b>Z</b>                      | -2.138 <sup>b</sup>               | -.418 <sup>b</sup>                 | -2.032 <sup>b</sup>                |                     |
| <b>Asymp. Sig. (2-tailed)</b> | .033                              | .676                               | .042                               |                     |
| <b>Test statistics</b>        |                                   |                                    |                                    |                     |
|                               | <b>VR1POSTPOM -<br/>VR1PREPOM</b> | <b>VR2POSTPOM -<br/>VR2PREPOMS</b> | <b>VR3POSTPOM -<br/>VR3PREPOMS</b> |                     |
| <b>Z</b>                      | -2.136 <sup>b</sup>               | -.255 <sup>b</sup>                 | -.315 <sup>c</sup>                 |                     |
| <b>Asymp. Sig. (2-tailed)</b> | .033                              | .799                               | .752                               |                     |
| <b>Test statistics</b>        |                                   |                                    |                                    |                     |
|                               | <b>VR1TAWEM - VR1TWEWM</b>        | <b>2AWEMTS - VR2WEMWTS</b>         | <b>VR3AWEMTS - VR3WEMWTS</b>       |                     |
| <b>Z</b>                      | -2.846 <sup>b</sup>               | -2.501 <sup>b</sup>                | -2.492 <sup>b</sup>                |                     |
| <b>Asymp. Sig. (2-tailed)</b> | .004                              | .012                               | .013                               |                     |

| POMS                          |                        | N                       | Mean Rank               | Sum of Ranks        |                     |                     |
|-------------------------------|------------------------|-------------------------|-------------------------|---------------------|---------------------|---------------------|
| VR1POSTPOM - VR1PREPOM        | Negative Ranks         | 2 <sup>a</sup>          | 7.50                    | 15.00               |                     |                     |
|                               | Positive Ranks         | 11 <sup>b</sup>         | 6.91                    | 76.00               |                     |                     |
|                               | Ties                   | 5 <sup>c</sup>          |                         |                     |                     |                     |
|                               | Total                  | 18                      |                         |                     |                     |                     |
| VR2POSTPOM - VR2PREPOMS       | Negative Ranks         | 6 <sup>d</sup>          | 4.17                    | 25.00               |                     |                     |
|                               | Positive Ranks         | 4 <sup>e</sup>          | 7.50                    | 30.00               |                     |                     |
|                               | Ties                   | 3 <sup>f</sup>          |                         |                     |                     |                     |
|                               | Total                  | 13                      |                         |                     |                     |                     |
| VR3POSTPOM - VR3PREPOMS       | Negative Ranks         | 4 <sup>g</sup>          | 3.00                    | 12.00               |                     |                     |
|                               | Positive Ranks         | 2 <sup>h</sup>          | 4.50                    | 9.00                |                     |                     |
|                               | Ties                   | 7 <sup>i</sup>          |                         |                     |                     |                     |
|                               | Total                  | 13                      |                         |                     |                     |                     |
| <b>Test statistics</b>        |                        |                         |                         |                     |                     |                     |
|                               | VR1POSTPOM - VR1PREPOM | VR2POSTPOM - VR2PREPOMS | VR3POSTPOM - VR3PREPOMS |                     |                     |                     |
| <b>Z</b>                      | -2.136 <sup>b</sup>    | -.255 <sup>b</sup>      |                         | -.315 <sup>c</sup>  |                     |                     |
| <b>Asymp. Sig. (2-tailed)</b> | .033                   | .799                    |                         | .752                |                     |                     |
| <b>SSC</b>                    |                        |                         |                         |                     |                     |                     |
|                               | VR3SCSSK - BSCSSK      | VR3SCSSJ - BSCSSJ       | VR3SCSCH - BSCSCH       | VR3SCSISO - BSCSISO | VR3SSCSM - BSCSM    | VR3SCSOI - BSCSOI   |
| <b>Z</b>                      | -1.011 <sup>b</sup>    | -.978 <sup>b</sup>      | -.224 <sup>c</sup>      | -1.261 <sup>b</sup> | -1.605 <sup>c</sup> | -1.430 <sup>b</sup> |
| <b>Asymp. Sig. (2-tailed)</b> | .312                   | .328                    | .823                    | .207                | .108                | .153                |

**Supplementary Tables 6a & 6b:** Multi-variate analyses comparing VR session scores

ANOVA for Electrodermal Activity (EDA) and Heart Rate

**Suppl Table 6a** Physiology Data – Electrodermal Activity (EDA) – VR 1 – Pre/Mid/Post**DESCRIPTIVE STATISTICS**

|                     | Mean  | Std. Deviation | N |
|---------------------|-------|----------------|---|
| <b>VR1 EDA PRE</b>  | 11.50 | 3.416          | 4 |
| <b>VR1 EDA MID</b>  | 8.75  | 2.217          | 4 |
| <b>VR1 EDA POST</b> | 8.25  | 2.062          | 4 |

**TESTS OF WITHIN-SUBJECTS EFFECTS**

| SOURCE             |                    | Type III Sum of Squares | df    | Mean Square | F      | Sig. | Partial Eta Squared |
|--------------------|--------------------|-------------------------|-------|-------------|--------|------|---------------------|
| <b>EDA1</b>        | Sphericity Assumed | 24.500                  | 2     | 12.250      | 13.364 | .006 | .817                |
|                    | Greenhouse-Geisser | 24.500                  | 1.658 | 14.781      | 13.364 | .011 | .817                |
|                    | Huynh-Feldt        | 24.500                  | 2.000 | 12.250      | 13.364 | .006 | .817                |
|                    | Lower-bound        | 24.500                  | 1.000 | 24.500      | 13.364 | .035 | .817                |
| <b>ERROR(EDA1)</b> | Sphericity Assumed | 5.500                   | 6     | .917        |        |      |                     |
|                    | Greenhouse-Geisser | 5.500                   | 4.973 | 1.106       |        |      |                     |
|                    | Huynh-Feldt        | 5.500                   | 6.000 | .917        |        |      |                     |
|                    | Lower-bound        | 5.500                   | 3.000 | 1.833       |        |      |                     |

**Suppl Table 6b** Physiology Data – Heart Rate – VR 2 – Pre/Mid/Post**DESCRIPTIVE STATISTICS**

|                    | Mean  | Std. Deviation | N |
|--------------------|-------|----------------|---|
| <b>VR2 HR PRE</b>  | 75.75 | 6.185          | 4 |
| <b>VR2 HR MID</b>  | 73.75 | 6.850          | 4 |
| <b>VR2 HR POST</b> | 75.00 | 6.683          | 4 |

**TESTS OF WITHIN-SUBJECTS EFFECTS**

| SOURCE            |                    | Type III Sum of Squares | df    | Mean Square | F      | Sig. | Partial Eta Squared |
|-------------------|--------------------|-------------------------|-------|-------------|--------|------|---------------------|
| <b>HR2</b>        | Sphericity Assumed | 8.167                   | 2     | 4.083       | 13.364 | .006 | .817                |
|                   | Greenhouse-Geisser | 8.167                   | 1.424 | 5.737       | 13.364 | .017 | .817                |
|                   | Huynh-Feldt        | 8.167                   | 2.000 | 4.083       | 13.364 | .006 | .817                |
|                   | Lower-bound        | 8.167                   | 1.000 | 8.167       | 13.364 | .035 | .817                |
| <b>ERROR(HR2)</b> | Sphericity Assumed | 1.833                   | 6     | .306        |        |      |                     |
|                   | Greenhouse-Geisser | 1.833                   | 4.271 | .429        |        |      |                     |
|                   | Huynh-Feldt        | 1.833                   | 6.000 | .306        |        |      |                     |
|                   | Lower-bound        | 1.833                   | 3.000 | .611        |        |      |                     |

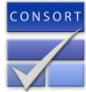

## CONSORT 2010 checklist of information to include when reporting a pilot or feasibility trial\*

| Section/Topic                    | Item No | Checklist item                                                                                                                                                                              | Reported on page No |
|----------------------------------|---------|---------------------------------------------------------------------------------------------------------------------------------------------------------------------------------------------|---------------------|
| <b>Title and abstract</b>        |         |                                                                                                                                                                                             |                     |
|                                  | 1a      | Identification as a pilot or feasibility randomised trial in the title                                                                                                                      | 1                   |
|                                  | 1b      | Structured summary of pilot trial design, methods, results, and conclusions (for specific guidance see CONSORT abstract extension for pilot trials)                                         | 4                   |
| <b>Introduction</b>              |         |                                                                                                                                                                                             |                     |
| Background and objectives        | 2a      | Scientific background and explanation of rationale for future definitive trial, and reasons for randomised pilot trial                                                                      | 4/5                 |
|                                  | 2b      | Specific objectives or research questions for pilot trial                                                                                                                                   | 6                   |
| <b>Methods</b>                   |         |                                                                                                                                                                                             |                     |
| Trial design                     | 3a      | Description of pilot trial design (such as parallel, factorial) including allocation ratio                                                                                                  | 6                   |
|                                  | 3b      | Important changes to methods after pilot trial commencement (such as eligibility criteria), with reasons                                                                                    | N/A                 |
| Participants                     | 4a      | Eligibility criteria for participants                                                                                                                                                       | 8                   |
|                                  | 4b      | Settings and locations where the data were collected                                                                                                                                        | 8                   |
|                                  | 4c      | How participants were identified and consented                                                                                                                                              | 8 and 14            |
| Interventions                    | 5       | The interventions for each group with sufficient details to allow replication, including how and when they were actually administered                                                       | 9 and 10            |
| Outcomes                         | 6a      | Completely defined prespecified assessments or measurements to address each pilot trial objective specified in 2b, including how and when they were assessed                                | 12                  |
|                                  | 6b      | Any changes to pilot trial assessments or measurements after the pilot trial commenced, with reasons                                                                                        | N/A                 |
|                                  | 6c      | If applicable, prespecified criteria used to judge whether, or how, to proceed with future definitive trial                                                                                 | 18                  |
| Sample size                      | 7a      | Rationale for numbers in the pilot trial                                                                                                                                                    | 13                  |
|                                  | 7b      | When applicable, explanation of any interim analyses and stopping guidelines                                                                                                                | N/A                 |
| Randomisation:                   |         |                                                                                                                                                                                             |                     |
| Sequence generation              | 8a      | Method used to generate the random allocation sequence                                                                                                                                      | N/A                 |
|                                  | 8b      | Type of randomisation(s); details of any restriction (such as blocking and block size)                                                                                                      | N/A                 |
| Allocation concealment mechanism | 9       | Mechanism used to implement the random allocation sequence (such as sequentially numbered containers), describing any steps taken to conceal the sequence until interventions were assigned | N/A                 |

|                                                                |                                                      |     |                                                                                                                                                                                       |                                                                        |
|----------------------------------------------------------------|------------------------------------------------------|-----|---------------------------------------------------------------------------------------------------------------------------------------------------------------------------------------|------------------------------------------------------------------------|
| 1<br>2                                                         | Implementation                                       | 10  | Who generated the random allocation sequence, who enrolled participants, and who assigned participants to interventions                                                               | N/A                                                                    |
| 3<br>4<br>5<br>6                                               | Blinding                                             | 11a | If done, who was blinded after assignment to interventions (for example, participants, care providers, those assessing outcomes) and how                                              | N/A                                                                    |
| 7                                                              |                                                      | 11b | If relevant, description of the similarity of interventions                                                                                                                           | N/A                                                                    |
| 8                                                              | Statistical methods                                  | 12  | Methods used to address each pilot trial objective whether qualitative or quantitative                                                                                                | 12, 14,                                                                |
| 9                                                              | <b>Results</b>                                       |     |                                                                                                                                                                                       |                                                                        |
| 10<br>11<br>12<br>13<br>14<br>15<br>16<br>17<br>18<br>19<br>20 | Participant flow (a diagram is strongly recommended) | 13a | For each group, the numbers of participants who were approached and/or assessed for eligibility, randomly assigned, received intended treatment, and were assessed for each objective | Suppl flowchart 1. Suppl table 1. Table 2, 3, on page 12               |
| 21                                                             |                                                      | 13b | For each group, losses and exclusions after randomisation, together with reasons                                                                                                      | 11, 12 acceptability and feasibility data                              |
| 22<br>23<br>24<br>25<br>26                                     | Recruitment                                          | 14a | Dates defining the periods of recruitment and follow-up                                                                                                                               | 9, 10                                                                  |
| 27                                                             |                                                      | 14b | Why the pilot trial ended or was stopped                                                                                                                                              | 11, Phase 2 – Evaluation/Acceptability of intervention                 |
| 28<br>29<br>30<br>31<br>32                                     | Baseline data                                        | 15  | A table showing baseline demographic and clinical characteristics for each group                                                                                                      | Phase 1 – Suppl table 1. Phase 2 – Page 12, table 3                    |
| 33<br>34<br>35<br>36<br>37<br>38<br>39<br>40<br>41<br>42       | Numbers analysed                                     | 16  | For each objective, number of participants (denominator) included in each analysis. If relevant, these numbers should be by randomised group                                          | Primary outcome: 12, Under 'Acceptability/feasibility data.' Secondary |

|                          |     |                                                                                                                                                                                |                                                                                               |
|--------------------------|-----|--------------------------------------------------------------------------------------------------------------------------------------------------------------------------------|-----------------------------------------------------------------------------------------------|
|                          |     |                                                                                                                                                                                | outcome: 11, under heading 'Participants', and 13-14, under heading 'Descriptive Statistics.' |
| Outcomes and estimation  | 17  | For each objective, results including expressions of uncertainty (such as 95% confidence interval) for any estimates. If relevant, these results should be by randomised group | 13-13 under heading 'Descriptive Statistics.'                                                 |
| Ancillary analyses       | 18  | Results of any other analyses performed that could be used to inform the future definitive trial                                                                               | 12, Table 4: Reasons for not completing. Qualitative findings, 14 - 16.                       |
| Harms                    | 19  | All important harms or unintended effects in each group (for specific guidance see CONSORT for harms)                                                                          | 13, under heading 'Adverse Events.'                                                           |
|                          | 19a | If relevant, other important unintended consequences                                                                                                                           | N/A                                                                                           |
| <b>Discussion</b>        |     |                                                                                                                                                                                |                                                                                               |
| Limitations              | 20  | Pilot trial limitations, addressing sources of potential bias and remaining uncertainty about feasibility                                                                      | 18                                                                                            |
| Generalisability         | 21  | Generalisability (applicability) of pilot trial methods and findings to future definitive trial and other studies                                                              | 17                                                                                            |
| Interpretation           | 22  | Interpretation consistent with pilot trial objectives and findings, balancing potential benefits and harms, and considering other relevant evidence                            | 17                                                                                            |
|                          | 22a | Implications for progression from pilot to future definitive trial, including any proposed amendments                                                                          | 17, 18                                                                                        |
| <b>Other information</b> |     |                                                                                                                                                                                |                                                                                               |



|   |              |    |                                                                                            |     |
|---|--------------|----|--------------------------------------------------------------------------------------------|-----|
| 1 | Registration | 23 | Registration number for pilot trial and name of trial registry                             | N/A |
| 2 | Protocol     | 24 | Where the pilot trial protocol can be accessed, if available                               | N/A |
| 3 | Funding      | 25 | Sources of funding and other support (such as supply of drugs), role of funders            | 19  |
| 4 |              | 26 | Ethical approval or approval by research review committee, confirmed with reference number | 8   |

7 Citation: Eldridge SM, Chan CL, Campbell MJ, Bond CM, Hopewell S, Thabane L, et al. CONSORT 2010 statement: extension to randomised pilot and feasibility trials. BMJ. 2016;355.

8 \*We strongly recommend reading this statement in conjunction with the CONSORT 2010, extension to randomised pilot and feasibility trials, Explanation and Elaboration for important  
9 clarifications on all the items. If relevant, we also recommend reading CONSORT extensions for cluster randomised trials, non-inferiority and equivalence trials, non-pharmacological  
10 treatments, herbal interventions, and pragmatic trials. Additional extensions are forthcoming: for those and for up to date references relevant to this checklist, see [www.consort-statement.org](http://www.consort-statement.org).

For peer review only

# BMJ Open

## SafeSpace: What is the feasibility and acceptability of a co-designed virtual reality intervention, incorporating compassionate mind training, to support people undergoing cancer treatment in a clinical setting?

|                                 |                                                                                                                                                                                                                                                                                                                                                                                                                                                                                                                                                                                                                                                                                                                                                                                                                                     |
|---------------------------------|-------------------------------------------------------------------------------------------------------------------------------------------------------------------------------------------------------------------------------------------------------------------------------------------------------------------------------------------------------------------------------------------------------------------------------------------------------------------------------------------------------------------------------------------------------------------------------------------------------------------------------------------------------------------------------------------------------------------------------------------------------------------------------------------------------------------------------------|
| Journal:                        | <i>BMJ Open</i>                                                                                                                                                                                                                                                                                                                                                                                                                                                                                                                                                                                                                                                                                                                                                                                                                     |
| Manuscript ID                   | bmjopen-2020-047626.R2                                                                                                                                                                                                                                                                                                                                                                                                                                                                                                                                                                                                                                                                                                                                                                                                              |
| Article Type:                   | Original research                                                                                                                                                                                                                                                                                                                                                                                                                                                                                                                                                                                                                                                                                                                                                                                                                   |
| Date Submitted by the Author:   | 22-Sep-2021                                                                                                                                                                                                                                                                                                                                                                                                                                                                                                                                                                                                                                                                                                                                                                                                                         |
| Complete List of Authors:       | O'Gara, Geraldine; Royal Marsden NHS Foundation Trust, Applied Health Research<br>Murray, Lisa; Portsmouth Hospitals NHS Trust, Department of Research and Innovation<br>Georgopoulou, Sofia; Royal Marsden Hospital NHS Trust, Applied Health Research<br>Anstiss, Tim; Virtual Health Labs, Founder<br>Macquarrie, Andrew; University College London, Department of Computer Science<br>Wheatstone, Pete; Royal Marsden NHS Foundation Trust, Patient and Public Representative<br>Bellman, Barbie; Royal Marsden NHS Foundation Trust, Patient and Public Representative<br>Gilbert, Paul; Derbyshire Healthcare NHS Foundation Trust, Mental Health Research Unit<br>Steed, Anthony; University College London, Department of Computer Science<br>Wiseman, Theresa; Royal Marsden NHS Foundation Trust, Applied Health Research |
| <b>Primary Subject Heading</b>: | Oncology                                                                                                                                                                                                                                                                                                                                                                                                                                                                                                                                                                                                                                                                                                                                                                                                                            |
| Secondary Subject Heading:      | Health services research, Nursing                                                                                                                                                                                                                                                                                                                                                                                                                                                                                                                                                                                                                                                                                                                                                                                                   |
| Keywords:                       | Adult oncology < ONCOLOGY, CHEMOTHERAPY, COMPLEMENTARY MEDICINE, QUALITATIVE RESEARCH                                                                                                                                                                                                                                                                                                                                                                                                                                                                                                                                                                                                                                                                                                                                               |
|                                 |                                                                                                                                                                                                                                                                                                                                                                                                                                                                                                                                                                                                                                                                                                                                                                                                                                     |

SCHOLARONE™  
Manuscripts



I, the Submitting Author has the right to grant and does grant on behalf of all authors of the Work (as defined in the below author licence), an exclusive licence and/or a non-exclusive licence for contributions from authors who are: i) UK Crown employees; ii) where BMJ has agreed a CC-BY licence shall apply, and/or iii) in accordance with the terms applicable for US Federal Government officers or employees acting as part of their official duties; on a worldwide, perpetual, irrevocable, royalty-free basis to BMJ Publishing Group Ltd ("BMJ") its licensees and where the relevant Journal is co-owned by BMJ to the co-owners of the Journal, to publish the Work in this journal and any other BMJ products and to exploit all rights, as set out in our [licence](#).

The Submitting Author accepts and understands that any supply made under these terms is made by BMJ to the Submitting Author unless you are acting as an employee on behalf of your employer or a postgraduate student of an affiliated institution which is paying any applicable article publishing charge ("APC") for Open Access articles. Where the Submitting Author wishes to make the Work available on an Open Access basis (and intends to pay the relevant APC), the terms of reuse of such Open Access shall be governed by a Creative Commons licence – details of these licences and which [Creative Commons](#) licence will apply to this Work are set out in our licence referred to above.

Other than as permitted in any relevant BMJ Author's Self Archiving Policies, I confirm this Work has not been accepted for publication elsewhere, is not being considered for publication elsewhere and does not duplicate material already published. I confirm all authors consent to publication of this Work and authorise the granting of this licence.

**Title Page**

**Title:** SafeSpace: What is the feasibility and acceptability of a co-designed virtual reality intervention, incorporating compassionate mind training, to support people undergoing cancer treatment in a clinical setting?

**Corresponding Author:**

Geraldine O’Gara  
Applied Health Research Team  
Royal Marsden NHS Foundation Trust  
Fulham Road  
London, UK  
SW3 6JJ  
[Geraldine.O’Gara@rmh.nhs.uk](mailto:Geraldine.O’Gara@rmh.nhs.uk)  
0208 915 4926

**Co Authors:**

Geraldine O’Gara  
Applied Health Research Team  
Royal Marsden NHS Foundation Trust  
London, UK

Lisa Murray  
Department of Research and Innovation  
Portsmouth Hospital NHS Trust  
Portsmouth PO6 3LY, UK

Dr Sofia Georgopoulou  
Applied Health Research Team  
Royal Marsden NHS Foundation Trust  
London, UK

Dr Tim Anstiss  
Founder  
Virtual Health Labs  
UK  
[Tim.Anstiss@virtualhealthlabs.org](mailto:Tim.Anstiss@virtualhealthlabs.org)

Dr Andrew Macquarrie  
Department of Computer Science  
University College London  
London, UK

Mr Pete Wheatstone  
Patient Public Representative  
Royal Marsden/ICR Biomedical Research Centre  
London, UK

Mrs Barbie Bellman

1  
2  
3 Patient Public Representative  
4 Royal Marsden NHS Foundation Trust  
5 London, UK  
6

7  
8 Professor Paul Gilbert  
9 Department of Clinical Psychology  
10 University of Derby  
11 Derby, UK  
12

13  
14 Professor Anthony Steed  
15 Department of Computer Science  
16 University College London  
17 London, UK  
18

19  
20 Professor Theresa Wiseman  
21 Applied Health Research Team  
22 Royal Marsden NHS Foundation Trust  
23 London, UK  
24

25  
26 Word count: 5279 (Not incl tables or Authorship, Funding, Data availability and Conflict of  
27 Interest statements)  
28  
29  
30  
31  
32  
33  
34  
35  
36  
37  
38  
39  
40  
41  
42  
43  
44  
45  
46  
47  
48  
49  
50  
51  
52  
53  
54  
55  
56  
57  
58  
59  
60

## Article Summary

### Strengths and Limitations of this study

- First study in an oncology setting exploring use of VR to deliver a psychological support intervention.
- Acceptability and feasibility were tested in the oncology setting. Within the evaluation phase, the potential impact of the intervention on psychological, physiological well-being and quality of life was assessed.
- Mixed-methods study: intervention developed using an experience-based co-design approach working with people affected by cancer, alongside qualitative techniques to capture experience of intervention use.
- The intervention consisted of three short sessions per participant. As compassionate mind training is relatively new and has had very limited use in cancer care, participants only received a small dose. This may have limited the overall effect of the intervention.
- This was an acceptability and feasibility project so sample size was small which limits the inferences that can be drawn from this study.

**Abstract:**

Objectives: The SafeSpace study co-designed and tested a virtual reality intervention, incorporating relaxation and compassionate mind-training to determine acceptability/feasibility in an oncology setting and evaluate impact on physical/psychological well-being and quality-of-life.

Design: A two-phase study. Phase 1 determined key characteristics using an Experienced-based Co-Design approach. Phase 2 evaluated the intervention using various measures and qualitative interviews in a mixed-methods approach. Descriptive statistics were used to analyse measures data, and framework analysis to analyse interviews.

Setting: A specialist cancer centre, UK.

Participants: 18 in phase 1; 21 in phase 2. Participants were in cancer treatment, recovery or palliative care.

Primary and secondary outcome: Primary outcome: acceptability of the intervention, assessed by >60% uptake of three sessions. Secondary outcomes: impact on psychological well-being using: EQ-5D/QLQ-C30, Profile of Mood Scale (POMS), Warwick and Edinburgh Mental Well-being scale (WEMWBS), Depression and Anxiety Severity Scale 21 (DASS21), Self-Compassion Scale (SCS), Acceptance and Action Questionnaire (AAQII), and a locally developed questionnaire to capture self-compassion post-use. Physiological impact was assessed by change in heart rate (HR)/heart rate variability (HRV) and electrodermal activity (EDA).

Results: Twenty participants (mean age=48.7 years; SD=16.87); 65% (n=13) completed three sessions. Mental well-being improved following each use and from baseline to after session 3 (VR 1-  $z = 2.846$ ,  $p < 0.01$ ; VR 2 -  $z = 2.501$ ,  $p < 0.01$ ; VR 3 -  $z = 2.492$ ,  $p < 0.01$ ). There was statistically significant difference in mean scores for EDA at mid- and post-session compared to pre-session ( $F(1.658, 4.973) = 13.364$ ,  $p < 0.05$ ). There was statistically significant reduction in stress levels from baseline to post-session 3. Participants found the intervention acceptable and highlighted areas for development.

Conclusion: The intervention is acceptable and feasible and has shown positive effects on mental well-being/stress in the oncology setting. Larger studies are needed to confirm findings.

Word count: 300

**Background:**

The number of people living with cancer is expected to double to four million over the next 20 years. (1). Treatment involves surgery, radiotherapy, chemotherapy or other, alone or in combination. Many treatments have unpleasant side-effects and consequently people may not comply with recommended regimens (2). People affected by cancer (PABC) commonly experience poor psychological wellbeing and poor quality of life (QoL) (3, 4, 5). Some become isolated from friends/family, or are unable to continue working, causing financial difficulties and further isolation (2). At least one in four – around 500,000 people in the UK – face poor health or disability after treatment (1).

*Virtual Reality*

Virtual reality (VR) is the computer-generated simulation of a three-dimensional image or environment that can be interacted with, or explored, in a way that seems real, by an individual using 3-D glasses, a headset with integrated screen, or gloves with integrated sensors. Healthcare has seen a growth in technologies such as VR to provide support (6). Recently, it has become more affordable and seen a dramatic improvement in user experience (7). It has previously been used in various applications including pain management, multiple sclerosis (8, 9, 10) and treatment of psychological conditions, such as phobias and anxiety (11, 12, 13). Within cancer care, VR has been used to manage pain, anxiety, and symptom distress. However, current literature regarding its effectiveness is equivocal. In a review of 19 studies (14), of those which reported on pain (n=6), half found that VR had a statistically significant positive effect in cancer patients. This was substantiated by other work (15) which reported decreased pain and state anxiety levels post-VR use by women with severe/chronic pain following breast cancer treatment. In contrast, a recent meta-analysis of cancer-related symptom management (16) showed the only statistically significant effect was reduced fatigue levels. Other studies (17, 18) using VR reported positive results as a distraction technique during chemotherapy administration. These were small samples (n=16; n=20 respectively) of women with breast cancer. Subsequent studies of larger, more diverse cohorts reported significant impact on reducing perception of time when receiving chemotherapy, validating the distractive nature of VR (19, 20).

*Compassion Focused Therapy*

Compassion can be defined as 'the sensitivity to suffering in self and others, with a deep commitment to try to relieve it'. Compassion-focused therapy (CFT) is an integrated, multimodal treatment approach that draws from sociology, psychology, and neuroscience (21). Central to CFT is compassionate mind-training (CMT) which was originally developed for people who find self-warmth and self-acceptance difficult (22; 23). It teaches the skill and practice of training the mind, by inviting people to develop their own images of warmth through practices such as slow and deeper breathing, compassionate voice tones, imagery, and facial expressions (24), and helps people develop self-compassion (22). CMT can be delivered on a one to one or group basis (25; 23). Studies examining other psychological interventions such as Cognitive Behavioural Therapy in a cancer population have shown favourable effects (26), however, this requires specialist training, supervision and certification needs (27), and appropriate training can be complex and costly (28, 29).



1  
2  
3 CMT can be self-administered and once learned, can be recalled in multiple environments including  
4 at home (21). CFT and CMT have been shown to reduce suffering and improve QoL in a range of  
5 health problems such as anxiety/depression, eating disorders, phobias and pain management (30,  
6 31, 32, 33) and are becoming more mainstream and acceptable (34, 35).  
7  
8

9 Whilst effectiveness is equivocal, the application of VR within cancer as a distraction technique is  
10 accepted. However, its use to deliver psychological therapies, such as CMT, remains unexplored.  
11 Little is known about how these treatment approaches might be combined, whether there is any  
12 synergistic effect, and if such an intervention is acceptable and feasible in the clinical environment.  
13

#### 14 Aim:

15  
16 To co-design a VR intervention, incorporating CMT, and assess its acceptability and feasibility to  
17 support people undergoing cancer treatment in a clinical setting.  
18  
19

20  
21 Primary outcome: acceptability of the intervention, assessed by >60% uptake of three  
22 sessions.  
23

24 Secondary outcomes: impact on psychological well-being using EQ-5D/QLQ-C30, Profile of  
25 Mood Scale (POMS), Warwick and Edinburgh Mental Well-being scale (WEMWBS), Depression  
26 and Anxiety Severity Scale 21 (DASS21), Self-Compassion Scale (SCS), Acceptance and Action  
27 Questionnaire (AAQII), and a locally developed questionnaire to capture self-compassion  
28 post-use. Physiological impact was assessed by change in heart rate (HR)/heart rate  
29 variability (HRV) and electrodermal activity (EDA).  
30  
31  
32  
33

#### 34 **Methods:**

35  
36 This was a two-phased study using an experience-based co-design (EBCD) approach in phase 1, and  
37 mixed-methods in phase 2. Due to the originality of the intervention, not previously implemented in  
38 this setting and population, this research is deemed an acceptability and feasibility study. EBCD is a  
39 method of participatory research that embeds experience of service users and staff into service  
40 design (36). Phase 1: development of the intervention by co-designing and refining several  
41 continuously improved prototypes with PABC. Intervention delivery and evaluation model were also  
42 established (please see supplementary file flowchart 1 for EBCD process). Phase 2: formal  
43 acceptability/feasibility and evaluation of the intervention, with PABC, using the range of  
44 psychological, physiological, and QoL measures agreed in Phase 1, and further explored through  
45 qualitative feedback obtained during follow-up interviews. Data were triangulated to strengthen the  
46 credibility of the acceptability and feasibility findings (37) (please see supplementary flowchart 2 for  
47 data triangulation process).  
48  
49  
50  
51

#### 52 **Sample:**

53  
54 A convenience sample was used to recruit participants to both phases of the study. Two separate  
55 groups of participants were recruited to either phase; phase 1 participants were no longer in  
56 treatment or follow-up; phase 2 participants were either receiving treatment or were in treatment  
57 follow-up.  
58  
59  
60

#### *Instruments for psychological assessment:*

Demographic data collected included age, gender, diagnosis, cancer group, cancer stage and aim of treatment.

#### The POMS

The POMS (38) examine six mood subscales: tension-anxiety, depression, anger-hostility, vigour, fatigue, and confusion. Total mood disturbance score is computed by adding the five negative subscale scores and subtracting the vigour score. Higher total mood score indicate greater degree of mood disturbance (39). The POMS subscales and total score have demonstrated sound internal consistency reliability ( $\alpha \geq 0.84$ ) (40).

#### The WEMWBS

The WEMWBS (41) is a 14-item scale of mental well-being covering subjective well-being and psychological functioning. It is scored by summing responses to each item on a 1-5 Likert scale. The minimum scale score is 14; maximum is 70. It has been validated in the UK in ages 16+ (42). A non-validated, adapted version, AWEMWBS, was used immediately after each intervention use. The WEMWBS asks participants to describe their experience over the last two weeks. The adapted version asks the participant to describe how they are feeling immediately after the intervention.

#### The AAQII

The AAQII is a seven-item measure of psychological inflexibility, or experiential avoidance. Items are scored on a Likert scale of 1 (never true) to 7 (always true) and are summed up. Higher scores equal greater levels of psychological inflexibility, with proven reliability and validity (43).

#### The SCS

The SCS (44) is a 26-item instrument that measures self-compassion through three hypothesized dimensions with their negative counterparts: self-kindness versus self-judgment, common humanity versus isolation, and mindfulness versus over-identification, according to a 5-point scale (1= Almost Never; 5= Almost Always). Subscale scores are computed by calculating the mean of subscale item responses. To compute the total score, the Self-Kindness, Common Humanity, and Mindfulness are summed with reverse scores of the Self-judgment, Isolation, and Over-identification subscales. Higher scores indicate greater self-compassion. In the original version, the total score showed excellent internal consistency ( $\alpha = .92$ ) and so did the six subscales (range: .75 - .81) (45).

#### The DASS-21

The DASS-21 (46) is a 21-item instrument that assesses depression, anxiety and stress. Each seven-item scale has four responses ranging from 0 (did not apply to me at all) to 3 (applied to me much/most of the time). A higher score indicates higher levels of depression, anxiety and stress. The DASS-21 has excellent internal consistency (47), and construct validity (47, 48).

#### The EQ5D-3L

The EQ5D (49) is designed to measure generic health outcome and comprises two parts: the EQ5D-3L self-classifier, a self-reported description of health problems according to five dimensions

(mobility, self-care, usual activities, pain/discomfort and anxiety/depression), and the EQ-VAS, a self-rated health status using a visual analogue scale to record perception of current overall health; the scale is graduated from 0 (the worst imaginable health state) to 100 (the best imaginable state). It has been shown to be reliable and valid in cancer populations (50).

#### The QLQ-C30

The QLQ-C30 (51) is used to measure general aspects of HRQOL in cancer patients. EORTC QLQ-C30, Version 3, incorporates five functional scales on physical (PF), role (RF), cognitive (CF), emotional (EF) and social (SF) functioning, three symptom scales on fatigue (FA), pain (PA) and nausea and vomiting (NV), single items assessing dyspnoea (DY), insomnia (SL), loss of appetite (AP), constipation (CO) and diarrhoea (DI), one item assessing perceived financial impact (FI) and global health status/QoL scale (Global QoL). Each item is scored in one of four categories 1) 'Not at all', 2) 'A little', 3) 'Quite a bit' 4) 'Very much', with the exception of 'Global QoL'. It has been shown to be reliable and valid in cancer populations (52, 53, 54).

#### Locally-developed questionnaire

The locally-developed questionnaire specifically targeted self-compassion after intervention use. It comprised 12 questions such as: 'To what extent did the virtual reality help you have insight into your current situation?' and 'To what extent did the virtual reality make you feel encouraged about the future?' Scored using a 7-item Likert scale ranging from not at all (1) to very much (7), the tool had excellent internal consistency ( $\alpha = 9.44$ ) (55); a higher score indicated that the intervention had a more positive impact.

#### *Physiological assessment:*

Physiological assessment was made using heart rate (HR), heart rate variability (HRV) and electrodermal activity (EDA) (56).

#### *Procedure:*

Potential participants were identified by clinical teams, and a diverse convenience sample undergoing a range of cancer treatments across tumour types from one specialist centre recruited. Inclusion criteria were: 1) having a diagnosis of cancer; 2) age over 18 years; 3) ability to provide written consent. Exclusion criteria were people: 1) considered too unwell; 2) in who use of VR is not recommended e.g., registered blind, motion sickness (57), seizure disorder or known psychiatric conditions such as schizophrenia or personality disorder (58). Exclusion criteria were assessed by medical records, self-report and in consultation with clinical staff. All procedures were in accordance with the Declaration of Helsinki (1964) and later amendments or comparable ethical standards. Procedure included two phases with two different groups of participants; phase 1 aimed to inform development of the intervention through a series of workshops with patients with previous experience of cancer and treatment. Phase 2 involved the application and evaluation of the intervention in the clinical setting with patients currently in treatment or follow-up, to assess acceptability and feasibility through intervention uptake and user experience. The study was reviewed by a statistician; Phase 1 is purely qualitative. Phase 2 statistical considerations are referred to in the descriptive statistics section.

1  
2  
3 Ethical approval:  
4

5 Ethical approval was acquired from a UK Research Ethics Committee (South Central – Oxford B REC  
6 18/SC/0346) and Health Research Authority (IRAS ID – 241770). Patient and Public involvement was  
7 sought for study design. Eligible participants received written information and gave informed  
8 consent before taking part.  
9

10  
11  
12 Patient and Public Involvement:  
13

14 Patient and public involvement (PPI) was sought, and we recruited two representatives to be  
15 members of the study team who further informed the research question and study processes. Both  
16 had personal experience of cancer and treatment and previous experience of PPI work as part of a  
17 research study. By nature, the experience-based co-design method involved patients in the  
18 intervention and evaluation design. The evaluation measures used were selected in collaboration  
19 with the patient participants who attended the evaluation workshop, and their burden considered.  
20 PPI representatives were not directly involved in participant recruitment. A lay summary of results  
21 will be shared with participants via email.  
22  
23  
24  
25

26 Results/findings:  
27

28 *Phase 1 - Intervention Development*  
29

30 Eleven participants in total took part, please see supplementary table 1. Five workshops, conducted  
31 over six months, were facilitated by a research team including experts in VR and CMT, using an EBCD  
32 approach. All were digitally recorded and, along with observations collected by two researchers,  
33 transcribed and analysed using thematic analysis.  
34  
35

36 *Initial design workshop* - Seven participants took part, which started with individuals telling their  
37 story, challenges along their pathway and what was important to include. Participants were able to  
38 try a range of equipment and experiences in a VR demonstration. They were encouraged to share,  
39 critique and propose ideas, using the design studio method (59). Analysis of data identified a  
40 number of 'touch points', these being what was emotionally most important to participants, which  
41 were used to inform the first iteration of the intervention.  
42  
43  
44

45 *User-testing workshops* - Three user-testing workshops took place in which three/four participants  
46 each were invited to try the subsequently developed prototype; a total of 11 participants took part  
47 in one or more. Participants were asked about their experience particularly focusing on quality and  
48 content of the intervention. Further 'touch points' informed the design of the next iteration, which  
49 was refined until the co-design team were satisfied it had been developed to acceptable quality.  
50  
51

52 Findings from Phase 1:  
53

54 Over the course of the user-testing workshops, the intervention became more refined and focused  
55 on detail within, such as recognition of what constitutes a 'safe space', voice quality (e.g.  
56 pace/tone), and guidance versus instruction. The themes that emerged which underpinned design  
57 of the final specification included: 1) *being given permission to 'step out' of current situation*; 2)  
58  
59  
60

1  
2  
3 *importance of voice; 3) need for sign-posting/on-boarding information; 4) being able to explore; 5)*  
4 *being guided versus being instructed.* The final iteration consisted of three short sessions of VR/CMT.  
5 VR 1 allowed participants to get used to being in a VR environment. VR 2 introduced a soothing  
6 breathing exercise, and VR 3 introduced a CMT self-compassion exercise. CMT language developing  
7 progressively with each use. A choice of three environments was given: a beach as a 360-degree  
8 video, and animated mountain and forest scenes. Professional voiceover actors provided a choice of  
9 female or male audio (table 1). It was agreed that the intervention should be offered at any stage of  
10 treatment and acknowledged that three sessions may not be sufficient to administer a meaningful  
11 'dose' of CMT but would be enough to generate preliminary data.  
12  
13  
14

15  
16 Table 1: Final intervention content

17  
18 All sessions approx. 10 minutes long

| VR1                                                          | VR2                                                     | VR3                                          |
|--------------------------------------------------------------|---------------------------------------------------------|----------------------------------------------|
| Choice of male or female voice                               | Choice of male or female voice                          | Choice of male or female voice               |
| Choice of a VR beach, mountain, or forest scene              | Choice of a VR beach, mountain, or forest scene         | Choice of a beach, mountain, or forest scene |
| Adapting to wearing VR headset and being in a VR environment | Simple soothing/breathing exercise, introduction to CMT | Simple CMT exercise                          |

19  
20  
21  
22  
23  
24  
25  
26  
27  
28  
29  
30  
31  
32

33  
34  
35 *Evaluation workshop* - A final workshop was held with five participants, who had taken part in either  
36 design or testing, to establish an evaluation model. A range of demographic, psychological and  
37 physiological measures were reviewed and agreed to be collected at baseline, and pre- and post-  
38 each intervention use (see Table 2). The final intervention was delivered on a head-mounted, stand-  
39 alone device; this was considered inexpensive and practical.  
40  
41

42 Table 2: Schedule for study procedure

| Measure                                          |                           | Baseline | Pre each intervention | Post each intervention |
|--------------------------------------------------|---------------------------|----------|-----------------------|------------------------|
| Name/age/gender/dx/tx etc                        | Demographic information   | X        |                       |                        |
| EQ-5D                                            | HRQoL                     | X        | X                     |                        |
| QLQ C30                                          | HRQoL                     | X        |                       | X                      |
| Action and Acceptance Questionnaire II - AAQII   | Psychological flexibility | X        |                       |                        |
| Depression, Anxiety and Stress Scale 21 – DASS21 | Anxiety/depression/stress | X        |                       | X                      |

43  
44  
45  
46  
47  
48  
49  
50  
51  
52  
53  
54  
55  
56  
57  
58  
59  
60

|                                                             |                                        |                                                              |   |   |
|-------------------------------------------------------------|----------------------------------------|--------------------------------------------------------------|---|---|
| Profile of Mood State - POMS                                | Mood                                   | X                                                            | X | X |
| Warwick Edinburgh Mental Well-being Scale - WEMWBS          | Mental well-being                      | X                                                            | X |   |
| Self-compassion Scale - SCS                                 | Self-compassion                        | X                                                            |   | X |
| Adapted Warwick Edinburgh Mental Well-being Scale - AWEMWBS | Mental well-being immediate time-point |                                                              |   | X |
| Locally developed questionnaire                             | Self-compassion                        |                                                              |   | X |
| Heart rate/heart rate variation/electrodermal activity      | Physiological                          | Monitored continuously before, during and after intervention |   |   |

### *Phase 2 – Evaluation/acceptability of intervention*

The final intervention was evaluated and tested for acceptability/feasibility. A further twenty-one people were recruited. Four study visits were organised, coinciding with planned appointments, spaced at least a week apart. At initial visit, written consent was obtained and demographic data collected. Participants completed the baseline set of questionnaires relating to psychological state and QoL. The study then proceeded as per table 2. Telephone interviews were conducted once the participant had completed intervention use.

### Quantitative

Summary measures for participant characteristics, VR use data variables and questionnaire scores were presented as means and standard deviations for continuous (approximate), normally distributed variables and frequencies. Categorical variables were reported as percentages. Shapiro-Wilk test was used to confirm normal distribution of continuous summary scales (all p values >0.05). Friedman's test for repeated measures was performed to assess whether there was a statistically significant difference in scores between baseline, VR1, VR2 and VR3. Wilcoxon signed ranks test was used to compare baseline and VR3 session scores. ANOVA was performed to assess changes in EDA, HR and HRV within each session. All p values were two-sided throughout; significance was set at the 5% level. IBM SPSS version 25 was used to analyse the data. Missing data were addressed (see supplementary Table 2).

### *Participants*

Seven males and 14 females consented to take part. One participant was subsequently lost to follow-up. Mean age was 48.7 years (SD=16.87; range: 22-77). Mean time elapsed since diagnosis was 37.08 months (SD= 45.00; range: 2-149). 16 participants (80%) were in active treatment. They had various tumour types with gynaecological cancer being most common (N=4; 20%) (See table 3).

**Table 3: Tumour type**

| Tumour Type        | N | %  |
|--------------------|---|----|
| Lower GI           | 2 | 10 |
| Haematological     | 1 | 5  |
| Gynaecological     | 4 | 20 |
| Head and Neck      | 3 | 15 |
| Breast             | 3 | 15 |
| Genitourinary (GU) | 3 | 15 |
| Other              | 4 | 20 |

*Acceptability/Feasibility Data*

In total, 49 sessions of VR were delivered and completed. Acceptability of the intervention was deemed satisfactory as >60% (N=13; 65%) of participants completed all three sessions. This was agreed by discussion with the statistician, based on evidence which reported attrition levels between 16.9% to 26.0% (60) and reporting drop-out rates of up to 41.4% (61). In addition, dropout rates were reportedly lower among studies that did not include some form of between-session intervention which was the case in the current study (60). Thus, 60% was deemed a safe option for acceptability purposes; and further agreed within the Evaluation Workshop.

Reasons for not completing and further details are displayed in Table 4.

**Table 4: Acceptability and feasibility data**

|                                                                    | VR1 |     | VR2 |     | VR3 |    |
|--------------------------------------------------------------------|-----|-----|-----|-----|-----|----|
|                                                                    | n   | %   | n   | %   | n   | %  |
| <b>No. that took part in VR:</b>                                   | 20  | 100 | 16  | 80  | 13  | 65 |
| <b>No. that did not take part in VR:</b>                           |     |     | 4   | 20  | 7   | 35 |
| <b>Reasons for not completing VR:</b>                              |     |     |     |     |     |    |
| Insufficient time                                                  |     |     | 1   | 25  | 3   | 43 |
| Deterioration in condition                                         |     |     |     |     | 1   | 14 |
| Discontinuation of treatment at site                               |     |     | 1   | 25  | 1   | 14 |
| Adverse effect from VR                                             |     |     |     |     | 1   | 14 |
| Unknown                                                            |     |     | 2   | 50  | 1   | 14 |
| <b>Voice:</b>                                                      |     |     |     |     |     |    |
| Male                                                               | 12  | 60  | 8   | 50  | 6   | 46 |
| Female                                                             | 8   | 40  | 8   | 50  | 7   | 54 |
| <b>Chosen VR environment:</b>                                      |     |     |     |     |     |    |
| Beach                                                              | 12  | 60  | 5   | 31  | 8   | 61 |
| Mountain                                                           | 6   | 30  | 8   | 50  | 5   | 39 |
| Forest                                                             | 2   | 10  | 3   | 19  | 0   | 0  |
| <b>Private room:</b>                                               |     |     |     |     |     |    |
| Yes                                                                | 11  | 55  | 9   | 56  | 8   | 61 |
| No                                                                 | 9   | 45  | 7   | 44  | 5   | 39 |
| <b>Did the participant change the environment whilst using VR?</b> |     |     |     |     |     |    |
| Yes                                                                | 2   | 10  | 0   | 0   | 1   | 8  |
| No                                                                 | 18  | 90  | 16  | 100 | 12  | 92 |

|                                                                        |       |    |       |      |       |     |
|------------------------------------------------------------------------|-------|----|-------|------|-------|-----|
| <b>Did the participant experience external noise?</b>                  |       |    |       |      |       |     |
| <b>Yes</b>                                                             | 9     | 45 | 6     | 37.5 | 5     | 38  |
| <b>No</b>                                                              | 11    | 55 | 10    | 62.5 | 8     | 62  |
| <b>Total time in VR (minutes):</b>                                     |       |    |       |      |       |     |
| <b>Mean</b>                                                            | 10.8  |    | 10.44 |      | 10.00 |     |
| <b>SD</b>                                                              | 1.852 |    | 2.502 |      | 1.633 |     |
| <b>Range</b>                                                           | 7-15  |    | 7-16  |      | 8-14  |     |
| <b>Did the participant experience any problems with the equipment?</b> |       |    |       |      |       |     |
| <b>No</b>                                                              | 12    |    | 13    |      | 12    |     |
| <b>Yes:</b>                                                            | 8     |    | 3     |      | 1     |     |
| <b>Minor</b>                                                           | 5     |    | 0     |      | 1     |     |
| <b>Additional intervention</b>                                         | 2     |    | 3     |      | 0     |     |
| <b>Unresolvable</b>                                                    | 1     |    | 0     |      | 0     |     |
| <b>Did the participant experience an adverse event?</b>                |       |    |       |      |       |     |
| <b>Yes</b>                                                             | 1     | 5  | 2     | 12.5 | 0     | 0   |
| <b>No</b>                                                              | 19    | 95 | 14    | 87.5 | 13    | 100 |

### *Adverse Events*

Three minor adverse events (AE) were recorded by two participants who experienced mild nausea and dizziness whilst using the intervention. In both, this resolved spontaneously. The third was in one of the same participants but occurred 48 hours after completing VR2. They reported nausea and dizziness for 48 hours resolving with bed-rest. Considering this, they were advised not to undergo the third session.

### **Descriptive Statistics**

Descriptive statistics were computed for all questionnaire scores within respective domains and are presented as frequencies and standard deviations (see supplementary table 3). Friedman and Wilcoxon signed ranks tests were performed to compare potential changes in variables between baseline and VR1, VR2 and VR3 sessions. Missing data for each variable is shown in supplementary table 4. Two-sided 95% confidence intervals for the exact percentage can be calculated with maximum +/-23% with a sample size of 20. The proposed sample size of 20 was chosen during the EBCD process mainly for pragmatic reasons and was determined by available resources. A sample size of between 24 and 50 has previously been recommended for pilot and feasibility studies (62).

### *Multi-variate Analyses*

#### *Quality of Life*

There were no statistically significant changes in QoL in either the EQ5D-3L or the QLQ-C30 responses (see supplementary table 5).

#### *Psychological Measures*

Total mood scores (POMS) were compared pre- and post-intervention. There was a statistically significant increase in total scores after the first session (VR 1) ( $z = -2.136$ ,  $p = 0.03$ ) suggesting there



was an improvement in mood. There was improvement in scores post-second session (VR2) but this was not statistically significant (see supplementary table 6). Mental well-being (WEMWBS) scores showed statistically significant changes to mental well-being from pre- to post-VR session (VR 1  $z = -2.846^b$   $p < 0.01$ ; VR 2  $z = -2.501^b$   $p < 0.01$ ; VR 3  $z = -2.492$ ,  $p < 0.01$ ). There was a consistent beneficial effect maintained throughout all sessions and a statistically significant increase in WEMWBS scores from baseline to VR 3 ( $\chi^2 = 12.905$ ,  $df = 3$ ,  $p = 0.005$ ) (see supplementary table 5 & 6).

There was a statistically significant reduction in stress levels as measured by the DASS21 from baseline to post-session 3 ( $z = -2.138^b$ ,  $p = 0.03$ ) (see supplementary table 6). While there was a positive and beneficial trend- from baseline to post-session 3 (VR3) in most of the sub scores, none reached statistical significance (see supplementary tables 5 & 6).

### Physiological measures

ANOVA were conducted to compare EDA, HR and HRV within each session. A decrease in mean EDA for each of the three sessions was recorded, dropping from pre-intervention level and maintained following removal of headset; this was significant for the first session. Using ANOVA with repeated measures and a Greenhouse-Geisser correction, mean scores for EDA were statistically significantly different at mid- and post-session compared to pre-session levels ( $F(1.658, 4.973) = 13.364$ ,  $p < 0.05$ ). Similarly, the only statistically significant change in HR was in the second session with a decrease from pre- to mid-session followed by a return to pre-session levels at post-session ( $F(1.424, 4.271) = 13.364$ ,  $p < 0.05$ ) (see supplementary tables 6a & 6b). No change was observed in HRV.

### *Qualitative findings*

As an acceptability/feasibility study, qualitative feedback was sought to support quantitative results and gather the reality of the intervention use in a real-world setting (63). Participants were invited to a semi-structured telephone interview to acquire a deeper understanding of their experience; eleven participants consented. Demographic data is shown in table 5. Interviews were audio-recorded and transcribed. Feedback was also given following each individual use of the intervention; this was summarised and recorded manually by the researcher and analysed alongside interview data using framework analysis (64). The framework was informed by analysis of the first two transcripts which were coded independently by three researchers and themes discussed and agreed. The subsequent interview transcripts and participant comments were analysed using the agreed framework. Three themes emerged: 1) *Practical issues*; 2) *Immersion*; 3) *Impact of intervention*.

*Table 5: Demographic information of interview participants*

| Age               | Gender           | Diagnosis               |
|-------------------|------------------|-------------------------|
| Mean = 55.5,      | Female: n=6, 55% | Urology: n=3, 27.3%     |
| Range 24-77 years | Male: N=5, 45%   | Gynaecology: n=3, 27.3% |
|                   |                  | Sarcoma: n=2, 18.1%     |

|  |  |                  |
|--|--|------------------|
|  |  | Bowel: n=1, 9.1% |
|  |  | Lung: n=1, 9.1%  |
|  |  | Other: n=1, 9.1% |

#### Practical Issues:

Participants reported equipment as comfortable and relatively straightforward to use. Clear guidance was considered important, and a designated room suggested for the future.

*'...putting the headset on isn't really a problem ... we're all going to have to get used to some kind of virtual reality at some point ... hadn't tried it before but it was very interesting.'* 012

The importance of tailoring to the individual was highlighted:

*'I find breathing exercises really frustrating ... I have tumours in my lungs, the amount I can inhale, the amount of time I can hold for is less than for other people. So, someone will say hold it this many beeps and then you can't . . . you feel like you failed at it and you check out ...'* 019

#### Immersion:

This relates to quality of VR imagery, ability to explore, and impact of voices used in the audio. Lack of quality was seen as negatively impacting immersion and improvement suggested for the future with a preference for 'real' environments rather than animated:

*'The beach was definitely more...realistic, you felt more sort of immersed in . . . compared with the other two.'* 026

Whilst there was positive reaction to the professional voices, some participants described becoming disengaged:

*'...I had the final session with the lady [voice], and she was excellent . . . it was very believable. She really did explain it, she was really part of it, and all that. Whereas, I felt with him [male voice], more like that he was reading a script.'* 027

Not all participants liked the compassion therapy aspect of the intervention:

*'... the compassionate mind therapy, I couldn't see the point of at all . . . you are in a compassion rich environment .... Nurses, the Doctors, friends and family. .. the last thing you .. need is another dose of compassion . . . '* 027

There was mixed reaction to external noise; some found it detracted from the quality of experience but others found it reassuring as it gave awareness of what was going on around them:

*'...the noise cancelling was pretty good but I did still hear, if I focused properly, the pump beeping if something went wrong . . . it was sort of the right balance between not being*

1  
2  
3 *completely disconnected if something happened. I think, anymore and I would have felt too*  
4 *isolated.’ 026*  
5

6  
7 *Impact of intervention:*

8  
9 The intervention was seen as having immediate and lasting effects, with some recognising the ability  
10 to replicate the ‘safe space’ for themselves:  
11

12 *‘The breathing techniques, I started to employ when I was having a scan even though the*  
13 *scan was very short. I thought that was quite useful for that. I hadn’t really thought of that*  
14 *before but I found it actually quite calming.’ 017*  
15

16  
17 For others, the impact was short-lived but still considered useful:  
18

19 *‘I don’t think it will have a lasting impact...It definitely made the rest of the day easier . . . .*  
20 *But the next day, the day after, I didn’t still have that same sense of calm, it was just kind of*  
21 *immediately after...’ 019*  
22

23  
24 Participants’ past experience of non-medical support measures emerged as relevant to  
25 receptiveness and engagement with the overall VR/CMT experience:  
26

27 *‘But I’ve also been on some of these yoga type things where you just try and relax and get*  
28 *into the mood and all that kind of thing. .. I thought it was quite useful for that. .. the*  
29 *talking was the same.’ 012*  
30

31  
32 Participants also gave valuable feedback regarding the research process and informing a larger  
33 study, with particular reference to burden of questionnaires:  
34

35 *‘I think some of them were a little bit repetitive, I though the one with all the options about*  
36 *being angry, sad, ... went on for ages. I don’t think that really needs to be that long.’ 017*  
37  
38  
39  
40

41 Qualitative findings supported the quantitative results and indicated that the intervention was  
42 acceptable and had a beneficial effect on mental well-being, anxiety, and stress (see supplementary  
43 table 7 for an example of data synthesis).  
44  
45  
46  
47  
48  
49  
50  
51  
52  
53  
54  
55  
56  
57  
58  
59  
60

1  
2  
3 Discussion:

4  
5 The aim of the study was to co-design a low-cost VR intervention enabling rapid access to safe, calm,  
6 and soothing environments accompanied by quality controlled and guided CMT exercises and assess  
7 acceptability/feasibility in an oncology setting. The intervention was found to be acceptable with  
8 nearly two-thirds of participants completing three sessions, meeting the defined end-point. This was  
9 supported by findings from interview data, confirming participants were positive, and supporting  
10 need for such interventions to help PABC deal with the psychological impact of cancer /treatment.  
11 This is consistent with wider literature in which new technologies were also found to be favourable,  
12 in their case, regardless of age, background or gender (17, 65). Also consistent, it was found to be  
13 acceptable and safe to use across several settings including inpatient, outpatient and day-care (17,  
14 18, 19, 65, 66, 67). Whilst a positive trend was observed in some psychological domains, the overall  
15 effectiveness of the intervention remains unclear.  
16  
17  
18

19  
20 The final version of the intervention consisted of three short, separate sessions of VR/CMT. It is  
21 difficult to determine whether VR or CMT had more effect as arguably patients only received a  
22 relatively small dose of CMT. This was substantiated in interview findings which highlighted that  
23 most participants were unaware of any progression and/or did not relate to the CMT exercises.  
24 Participants thought the intervention should be longer, and incorporate more sessions, to have  
25 lasting effect. Other research in people having chemotherapy (20) argues that VR may not be  
26 effective for all as those with greater symptom distress had more accurate perception of time,  
27 suggesting they were not able to block out negative external cues. In order to effect significant  
28 change on individual levels of self-compassion, more and longer sessions may be required (68). A  
29 future multi-arm RCT may explore which aspect (VR/CMT/ both) has most, if any, effect.  
30 Acceptability and feasibility data also showed the beach scene to be the most popular, and the  
31 forest scene the least. This is echoed in other work that cites a tree environment as gloomy (69) and  
32 highlights the importance of choice.  
33  
34  
35  
36

37  
38 Throughout both phases, participants expressed that they liked being able to step out of their  
39 situation into a 'safe space', and some positively described re-imagining the VR environment when  
40 they felt stressed. This happened quickly; for some, it was after the first session. Consistent with  
41 other work (19, 20), participants reported time passed quickly whilst using the intervention  
42 suggesting distractive qualities which may be helpful during lengthy or perceived unpleasant  
43 procedures. 'Presence' within the context of VR has been defined as the "sense of being there", or  
44 as the "feeling of being in a world that exists outside the self" and causes the user to suspend  
45 disbelief and believe they are in the virtual environment, reacting as if they are in the real world  
46 (70). This varied between participants, as the quality of imagery and content of audio were reported  
47 by some as detracting from the immersive experience. It is generally acknowledged that presence is  
48 dependent on either the characteristics of the user and the media employed (71), and relates to  
49 willingness to suspend disbelief. Our findings support this; those who had engaged with  
50 psychological therapies previously reported they were less concerned with the quality of imagery.  
51 Arguably, this study engaged an unusual convenience sample with a mean time since diagnosis of 3  
52 years, of which 80% were still in treatment who potentially may have been more exposed to such  
53 therapies over time. Moving forward, using tools to evaluate the degree of presence, such as the  
54 Presence Questionnaire PQ (72) and perhaps time perception may be valuable.  
55  
56  
57  
58  
59  
60

1  
2  
3 A key challenge is identifying who might benefit most from VR, alongside who is not appropriate, to  
4 ensure safety. Research (17 18, 19) has highlighted benefits in chemotherapy populations in  
5 particular, with reduction of fatigue, anxiety, symptom distress and perception of time. Contrary to  
6 this, in our study both participants who experienced AEs were undergoing chemotherapy. However,  
7 effects were mild and could not definitively be attributed to the intervention. For one, the effect was  
8 so mild that it was not mentioned at the time, and the other was disappointed not to continue,  
9 seeing the benefit of the VR experience outweighing effect of the AE. Clinical guidance surrounding  
10 patient monitoring during use is recommended.  
11  
12  
13

14 Interesting findings in terms of *secondary* aims emerged; in particular, improvements in mental well-  
15 being and stress. Surprisingly, and consistent with other research (73) we did not see a statistically  
16 significant reduction in anxiety levels as reported in other VR studies in this setting (15, 18). This  
17 needs to be treated with caution as this could be due to use of different measures. Standardisation  
18 may help to make future findings more generalisable/comparable.  
19  
20

21 A strength is the mixed-methods approach whereby qualitative techniques were employed to  
22 capture experience of the intervention, and strengthen the rigour of the acceptability and feasibility  
23 process (37). The majority of studies use tools to capture symptom change (15, 20, 67) with only  
24 one (74) using open-ended questions in their methodology. Further commonalities included issues  
25 surrounding appropriate usage space, and the negative effect of external noise. Developing the  
26 intervention for home use may improve quality and impact of experience.  
27  
28  
29

30 The study has several limitations. The sample size was small (n=21) and the study is potentially  
31 underpowered, with a high attrition rate. However, this number of participants was deemed  
32 appropriate by the EBCD group (who developed the evaluation model) and local statisticians, to  
33 assess the intervention for acceptability, and included a diverse mix of demographics,  
34 tumour/treatment type. The small sample did not allow for adjustment of confounding variables in  
35 the quantitative analysis so that any notable differences in baseline characteristics or response to  
36 the intervention in the study population could be identified. It is acknowledged that a larger sample  
37 would be needed moving forward. Reasons for attrition are noted and may provide intelligence for  
38 any future pilot or larger study. Furthermore, even though the EBCD group designed the evaluation  
39 model and chose measures, interview data highlighted that the quantity were burdensome and  
40 repetitive. Consequently, participants described being unable to give full attention and findings may  
41 not be a true reflection of feelings. Two non-validated tools were used to capture mental wellbeing  
42 and participant self-compassion, and as such may lack consistency and sensitivity.  
43  
44  
45  
46  
47

## 48 **Conclusion**

49 A VR/CMT intervention is acceptable to PABC and is recognized as offering a novel approach to  
50 addressing unmet psychological needs at various stages of the cancer pathway. Whilst feasible/safe  
51 to deliver in the oncology setting, developing a flexible approach in which users can access the  
52 intervention independently e.g. in their own homes, may increase uptake/impact and allow more  
53 autonomy. Future research should focus on conducting larger scale RCT's in which length or  
54 frequency of VR and amount of CMT given would be increased, alongside a bigger sample and a  
55 control to increase generalizability of findings. Careful consideration is required when selecting  
56 evaluative measures  
57  
58  
59  
60

1  
2  
3 Author contributions: TW, GO, LM, TA, AM contributed to study concept and design, data  
4 acquisition, analysis and interpretation; drafting and revising for critically important intellectual  
5 content; final approval of version to be published and accountable for accuracy and integrity. SG  
6 contributed to data analysis and interpretation; drafting and revising for critically important  
7 intellectual content; final approval of version to be published and accountable for accuracy and  
8 integrity. PW and BB contributed to study design, drafting and revising for critically important  
9 intellectual content; final approval of version to be published and accountable for accuracy and  
10 integrity. PG and AS contributed to study concept and design; drafting and revising for critically  
11 important intellectual content; final approval of version to be published and accountable for  
12 accuracy and integrity.

13  
14  
15  
16  
17 Funding statement: This work was funded by Macmillan Cancer Support grant number 6488094.  
18 Macmillan Cancer Support approved the final study design and oversaw data collection, analysis and  
19 interpretation as part of the study steering committee. Macmillan Cancer Support also approved  
20 the final report and the decision to submit for publication with BMJ Open.

21  
22  
23 Data availability statement:

24 All data are deidentified participant data. All data are securely stored at the host organisation and  
25 can be made available upon request to the first author.

26  
27  
28 Conflict of interests: None declared.

## 29 30 31 32 33 34 35 36 37 38 39 40 41 42 43 44 45 46 47 48 49 50 51 52 53 54 55 56 57 58 59 60

### References

1. Maddams J, Brewster D, Gavin A, Steward J, Elliott J, Utley M, Møller H. Cancer prevalence in the United Kingdom: estimates for 2008. *British journal of cancer*. 2009 Aug;101(3):541-7.
2. Macmillan (2013) *Throwing light on the consequences of cancer*. [Online] Available at: <https://www.macmillan.org.uk/documents/aboutus/research/researchandevaluationreports/throwinglightontheconsequencesofcanceranditstreatment.pdf>. Accessed Sept 2018
3. Linden W, Vodermaier A, MacKenzie R, Greig D. Anxiety and depression after cancer diagnosis: prevalence rates by cancer type, gender, and age. *Journal of affective disorders*. 2012 Dec 10;141(2-3):343-51.
4. Zajacova A, Dowd JB, Schoeni RF, Wallace RB. Employment and income losses among cancer survivors: estimates from a national longitudinal survey of American families. *Cancer*. 2015 Dec 15;121(24):4425-32.
5. Bours MJ, van der Linden BW, Winkels RM, van Duijnhoven FJ, Mols F, van Roekel EH, Kampman E, Beijer S, Weijenberg MP. Candidate predictors of health-related quality of life of colorectal cancer survivors: a systematic review. *The oncologist*. 2016 Apr;21(4):433.
6. Pearce, C. and Haikerwal, M.C., 2010. E-health in Australia: time to plunge into the 21st century. *Medical Journal of Australia*, 193(7), pp.397-398.

- 1  
2  
3 7. Rakvar. How much do VR headsets cost? [Online]. Available at:  
4 <https://smartglasseshub.com/vr-headset-prices>. Accessed 01.06.2021  
5
- 6 8. Malloy KM, Milling LS. The effectiveness of virtual reality distraction for pain reduction: a  
7 systematic review. *Clinical psychology review*. 2010 Dec 1;30(8):1011-8.  
8
- 9 9. .Masseti T, Trevizan IL, Arab C, Favero FM, Ribeiro-Papa DC, de Mello Monteiro CB. Virtual  
10 reality in multiple sclerosis—a systematic review. *Multiple sclerosis and related disorders*.  
11 2016 Jul 1;8:107-12.  
12
- 13 10. Indovina P, Barone D, Gallo L, Chirico A, De Pietro G, Giordano A. Virtual reality as a  
14 distraction intervention to relieve pain and distress during medical procedures. *The Clinical*  
15 *journal of pain*. 2018 Sep 1;34(9):858-77.  
16
- 17 11. Rothbaum BO, Hodges LF, Kooper R, Opdyke D, Williford JS, North M. Virtual reality graded  
18 exposure in the treatment of acrophobia: A case report. *Behavior therapy*. 1995 Jun  
19 1;26(3):547-54.  
20
- 21 12. Rothbaum BO, Hodges L, Smith S, Lee JH, Price L. A controlled study of virtual reality  
22 exposure therapy for the fear of flying. *Journal of consulting and Clinical Psychology*. 2000  
23 Dec;68(6):1020.  
24
- 25 13. Michaliszyn D, Marchand A, Bouchard S, Martel MO, Poirier-Bisson J. A randomized,  
26 controlled clinical trial of in virtuo and in vivo exposure for spider phobia. *Cyberpsychology,*  
27 *Behavior, and Social Networking*. 2010 Dec 1;13(6):689-95.  
28
- 29 14. Chirico A, Lucidi F, De Laurentiis M, Milanese C, Napoli A, Giordano A. Virtual reality in  
30 health system: beyond entertainment. a mini-review on the efficacy of VR during cancer  
31 treatment. *Journal of cellular physiology*. 2016 Feb;231(2):275-87.  
32
- 33 15. Mohammad EB, Ahmad M. Virtual reality as a distraction technique for pain and anxiety  
34 among patients with breast cancer: A randomized control trial. *Palliative & supportive care*.  
35 2019 Feb;17(1):29-34.  
36
- 37 16. Zeng Y, Zhang JE, Cheng AS, Cheng H, Wefel JS. Meta-analysis of the efficacy of virtual  
38 reality-based interventions in cancer-related symptom management. *Integrative cancer*  
39 *therapies*. 2019 Aug;18:1534735419871108.  
40
- 41 17. Schneider SM, Ellis M, Coombs WT, Shonkwiler EL, Folsom LC. Virtual reality intervention  
42 for older women with breast cancer. *CyberPsychology & Behavior*. 2003 Jun 1;6(3):301-7.  
43
- 44 18. Schneider SM, Prince-Paul M, Allen MJ, Silverman P, Talaba D. Virtual reality as a distraction  
45 intervention for women receiving chemotherapy. In *Oncology nursing forum* 2004 Jan 1  
46 (Vol. 31, No. 1).  
47
- 48 19. Schneider SM, Hood LE. Virtual reality: a distraction intervention for chemotherapy.  
49 In *Oncology nursing forum* 2007 Jan (Vol. 34, No. 1, p. 39). NIH Public Access.  
50
- 51 20. Schneider SM, Kisby CK, Flint EP. Effect of virtual reality on time perception in patients  
52 receiving chemotherapy. *Supportive Care in Cancer*. 2011 Apr 1;19(4):555-64.  
53  
54  
55  
56  
57  
58  
59  
60

- 1  
2  
3  
4  
5  
6 21. Gilbert P. An introduction to compassion focused therapy in cognitive behavior therapy. *International Journal of Cognitive Therapy*. 2010 Jun;3(2):97-112.
- 7  
8  
9 22. Gilbert P. Introducing compassion-focused therapy. *Advances in psychiatric treatment*. 2009  
10 May;15(3):199-208.
- 11  
12 23. Gilbert P, Procter S. Compassionate mind training for people with high shame and  
13 self-criticism: Overview and pilot study of a group therapy approach. *Clinical Psychology &*  
14 *Psychotherapy: An International Journal of Theory & Practice*. 2006 Nov;13(6):353-79.
- 15  
16 24. Matos M, Duarte C, Duarte J, Pinto-Gouveia J, Petrocchi N, Basran J, Gilbert P. Psychological  
17 and physiological effects of compassionate mind training: a pilot randomised controlled  
18 study. *Mindfulness*. 2017 Dec;8(6):1699-712.
- 19  
20 25. Mayhew SL, Gilbert P. Compassionate mind training with people who hear malevolent  
21 voices: A case series report. *Clinical Psychology & Psychotherapy: An International Journal of*  
22 *Theory & Practice*. 2008 Mar;15(2):113-38.
- 23  
24 26. Jassim GA, Whitford DL, Hickey A, Carter B. Psychological interventions for women with  
25 non-metastatic breast cancer. *Cochrane Database of Systematic Reviews* 2015, Issue 5. Art.  
26 No.: CD008729. DOI: 10.1002/14651858.CD008729.pub2. Accessed 01 June 2021.
- 27  
28 27. Weissman MM, Verdeli H, Gameroff MJ, Bledsoe SE, Betts K, Mufson L, Fitterling H,  
29 Wickramaratne P: National survey of psychotherapy training in psychiatry, psychology, and  
30 social work. *Arch Gen Psychiatry* 2006; 63:925–934
- 31  
32 28. Sholomskas DE, Syracuse-Siewert G, Rounsaville BJ, Ball SA, Nuro KF, Carroll KM: We don't  
33 train in vain: a dissemination trial of three strategies of training clinicians in cognitive-  
34 behavioral therapy. *J Consult Clin Psychol* 2005; 73:106–115 10.
- 35  
36 29. Morgenstern J, Morgan TJ, McCrady BS, Keller DS, Carroll KM: Manual-guided cognitive-  
37 behavioral therapy training: a promising method for disseminating empirically supported  
38 substance abuse treatments to the practice community. *Psychol Addict Behav* 2001; 15:83–  
39 88
- 40  
41 30. Judge L, Cleghorn A, McEwan K, Gilbert P. An exploration of group-based compassion  
42 focused therapy for a heterogeneous range of clients presenting to a community mental  
43 health team. *International Journal of Cognitive Therapy*. 2012 Dec;5(4):420-9.
- 44  
45 31. Leaviss J, Uttley L. Psychotherapeutic benefits of compassion-focused therapy: An early  
46 systematic review. *Psychological medicine*. 2015 Apr;45(5):927-45.
- 47  
48 32. Anstiss T, Passmore J, Gilbert P. Compassion: the essential orientation. *Psychologist*.. 2020  
49 May 1;33:38-42.
- 50  
51 33. Gooding H, Stedmon J, Crix D. 'All these things don't take the pain away but they do help  
52 you to accept it': making the case for compassion-focused therapy in the management of  
53 persistent pain. *British Journal of Pain*. 2020 Feb;14(1):31-41.
- 54  
55  
56  
57  
58  
59  
60



- 1
  - 2
  - 3
  - 4
  - 5
  - 6
  - 7
  - 8
  - 9
  - 10
  - 11
  - 12
  - 13
  - 14
  - 15
  - 16
  - 17
  - 18
  - 19
  - 20
  - 21
  - 22
  - 23
  - 24
  - 25
  - 26
  - 27
  - 28
  - 29
  - 30
  - 31
  - 32
  - 33
  - 34
  - 35
  - 36
  - 37
  - 38
  - 39
  - 40
  - 41
  - 42
  - 43
  - 44
  - 45
  - 46
  - 47
  - 48
  - 49
  - 50
  - 51
  - 52
  - 53
  - 54
  - 55
  - 56
  - 57
  - 58
  - 59
  - 60
34. Neff KD, Germer CK. A pilot study and randomized controlled trial of the mindful self-compassion program. *Journal of clinical psychology*. 2013 Jan;69(1):28-44.
35. Kirby JN. Compassion interventions: The programmes, the evidence, and implications for research and practice. *Psychology and Psychotherapy: Theory, Research and Practice*. 2017 Sep;90(3):432-55.
36. Weston C, Soanes L, Chisholm J, Wiseman T. 'Out There': Developing a transition pathway for adolescents and young adults with cancer using Experience-Based Co-Design. *The Journal of Health Design*. 2018 Mar 22;3(1).
37. Creswell JW (1994). *Research Design: Qualitative and Quantitative Approaches*. Sage: London
38. McNair DM, Lorr M, Droppleman LF. *Manual for the profile of mood states (POMS)*. San Diego: Educational and Industrial Testing Service. 1971.
39. Biehl B, Landauer A. *Das Profile of Mood States (POMS) Mannheim: 1975*
40. Wyrwich, K.W. and Yu, H., 2011. Validation of POMS questionnaire in postmenopausal women. *Quality of Life Research*, 20(7), pp.1111-1121.
41. Tennant R, Hiller L, Fishwick R, Platt S, Joseph S, Weich S, Parkinson J, Secker J, Stewart-Brown S. The Warwick-Edinburgh mental well-being scale (WEMWBS): development and UK validation. *Health and Quality of life Outcomes*. 2007 Dec;5(1):63.
42. Stewart-Brown S, Janmohamed K. *Warwick-Edinburgh mental well-being scale. User guide. Version*. 2008 Jun;1.
43. Bond FW, Hayes SC, Baer RA, Carpenter KM, Guenole N, Orcutt HK, Waltz T, Zettle RD. Preliminary psychometric properties of the Acceptance and Action Questionnaire-II: A revised measure of psychological inflexibility and experiential avoidance. *Behavior therapy*. 2011 Dec 1;42(4):676-88.
44. Neff KD. The development and validation of a scale to measure self-compassion. *Self and identity*. 2003 Jul 1;2(3):223-50.
45. Cunha M, Xavier A, Castilho P. Understanding self-compassion in adolescents: Validation study of the Self-Compassion Scale. *Personality and Individual Differences*. 2016 Apr 1;93:56-62.
46. Lovibond SH, Lovibond PF. *Manual for the depression anxiety stress scales*. Sydney: Psychology Foundation; 1995.
47. Henry JD, Crawford JR. The short-form version of the Depression Anxiety Stress Scales (DASS-21): Construct validity and normative data in a large non-clinical sample. *British journal of clinical psychology*. 2005 Jun;44(2):227-39.
48. Page AC, Hooke GR, Morrison DL. Psychometric properties of the Depression Anxiety Stress Scales (DASS) in depressed clinical samples. *British Journal of Clinical Psychology*. 2007 Sep;46(3):283-97.
49. The EuroQol Group (1990) EuroQol – a new facility for the measurement of health-related quality of life. *Health Policy* 16:199–208
50. Kim et al. *Health and Quality of Life Outcomes* (2015) 13:203
51. Aaronson NK, Ahmedzai S, Bergman B, Bullinger M, Cull A, Duez NJ, Filiberti A, Flechtner H, Fleishman SB, de Haes JC, Kaasa S. The European Organization for Research and Treatment

- of Cancer QLQ-C30: a quality-of-life instrument for use in international clinical trials in oncology. *JNCI: Journal of the National Cancer Institute*. 1993 Mar 3;85(5):365-76.
52. Apolone G, Filiberti A, Cifani S, Ruggiata R, Mosconi P. Evaluation of the EORTC QLQ-C30 questionnaire: a comparison with SF-36 Health Survey in a cohort of Italian long-survival cancer patients. *Annals of Oncology*. 1998 May 1;9(5):549-57.
53. Kobayashi K, Takeda F, Teramukai S, Gotoh I, Sakai H, Yoneda S, Noguchi Y, Ogasawara H, Yoshida K. A cross-validation of the European Organization for Research and Treatment of Cancer QLQ-C30 (EORTC QLQ-C30) for Japanese with lung cancer. *European Journal of Cancer*. 1998 May 1;34(6):810-5.
54. Arraras JI, Arias F, Tejedor M, Pruja E, Marcos M, Martínez E, Valerdi J. The EORTC QLQ-C30 (version 3.0) quality of life questionnaire: validation study for Spain with head and neck cancer patients. *Psycho-Oncology: Journal of the Psychological, Social and Behavioral Dimensions of Cancer*. 2002 May;11(3):249-56.
55. Cronbach LJ. Coefficient alpha and the internal structure of tests. *psychometrika*. 1951 Sep 1;16(3):297-334.
56. Dawson ME, Schell AM, Filion DL. The electrodermal system.
57. Nichols S, Patel H. Health and safety implications of virtual reality: a review of empirical evidence. *Appl Ergon* 2002 May;33(3):251-271
58. Cartwright GF. Virtual or real? The mind in cyberspace. *The Futurist* 28(2), 22–26 (1994).
59. Edenspeikermann, 2016. The Design Studio Method. [Online] Available at: <http://www.edenspeikermann.com/insights/working-with-design-studios/>. Accessed 10 Sept 2019
60. Benbow & Anderson. A meta-analysis examination of attrition in virtual reality exposure therapy for anxiety disorders. *Journal of anxiety disorders*, 2019, 61, pp 18-26.
61. Krijn, M., Emmelkamp, P. M. G., Biemond, R., de Wilde de Ligny, C., Schuemie, M. J., & van der Mast, C. A. P. G. (2004). Treatment of acrophobia in virtual reality: The role of immersion and presence. *Behaviour Research & Therapy*, 42(2), 229.
62. Sim J, Lewis M. The size of a pilot study for a clinical trial should be calculated in relation to considerations of precision and efficiency. *Journal of clinical epidemiology*. 2012 Mar 1;65(3):301-8.
63. Bowen DJ, Kreuter M, Spring B, Cofta-Woerpel L, Linnan L, Weiner D, Bakken S, Kaplan CP, Squiers L, Fabrizio C, Fernandez M. How we design feasibility studies. *American journal of preventive medicine*. 2009 May 1;36(5):452-7.
64. Ritchie J and Spencer L (1994) Qualitative data analysis for applied policy research. *Analyzing Qualitative Data*. Edited by: Bryman A, Burgess RG. London: Routledge.
65. Baños RM, Etchemendy E, Castilla D, García-Palacios A, Quero S, Botella C. Positive mood induction procedures for virtual environments designed for elderly people. *Interacting with Computers*. 2012 May 1;24(3):131-8.
66. Espinoza M, Baños RM, García-Palacios A, Cervera JM, Esquerdo G, Barrajón E, Botella C. Promotion of emotional wellbeing in oncology inpatients using VR.
67. Niki K, Okamoto Y, Maeda I, Mori I, Ishii R, Matsuda Y, Takagi T, Uejima E. A novel palliative care approach using virtual reality for improving various symptoms of terminal cancer

- 1  
2  
3 patients: A preliminary prospective, multicenter study. *Journal of palliative medicine*. 2019  
4 Jun 1;22(6):702-7.  
5  
6 68. Neff KD, Dahm KA. Self-compassion: What it is, what it does, and how it relates to  
7 mindfulness. In *Handbook of mindfulness and self-regulation 2015* (pp. 121-137). Springer,  
8 New York, NY.  
9  
10 69. Nikolajsen, L., Lyndgaard, K., Schriver, N.B. and Moller, J.F., 2009. Does audiovisual  
11 stimulation with music and nature sights (MuViCure) reduce pain and discomfort during  
12 placement of a femoral nerve block?. *Journal of PeriAnesthesia Nursing*, 24(1), pp.14-18.  
13  
14  
15 70. Rogers S. Why is presence important for virtual reality? Online. Available at:  
16 <https://www.vrfocus.com/2017/11/why-is-presence-important-for-virtual-reality/> Accessed  
17 November 2019.  
18  
19 71. Lombard M, Ditton T. At the heart of it all: The concept of presence. *Journal of computer-*  
20 *mediated communication*. 1997 Sep 1;3(2):JCMC321.  
21  
22 72. Witmer BG, Singer MJ. Measuring presence in virtual environments: A presence  
23 questionnaire. *Presence*. 1998 Jun;7(3):225-40.  
24  
25 73. Glennon C, McElroy SF, Connelly LM, Lawson LM, Bretches AM, Gard AR, Newcomer LR. Use  
26 of Virtual Reality to Distract From Pain and Anxiety. In *Oncology nursing forum 2018 Jul 1*  
27 (Vol. 45, No. 4).  
28  
29 74. Baños RM, Espinoza M, García-Palacios A, Cervera JM, Esquerdo G, Barraón E, Botella C. A  
30 positive psychological intervention using virtual reality for patients with advanced cancer in a  
31 hospital setting: a pilot study to assess feasibility. *Supportive Care in Cancer*. 2013 Jan  
32 1;21(1):263-70.  
33  
34  
35  
36  
37  
38  
39  
40  
41  
42  
43  
44  
45  
46  
47  
48  
49  
50  
51  
52  
53  
54  
55  
56  
57  
58  
59  
60

## Appendix

## Supplementary tables

| Study no | Gender | Age years | Diagnosis             | Design workshop | User testing workshop 1 | User testing workshop 2 | User testing Workshop 3 | Evaluation workshop |
|----------|--------|-----------|-----------------------|-----------------|-------------------------|-------------------------|-------------------------|---------------------|
| 1        | Male   | 54        | Ca prostate           | Yes             | Yes                     | No                      | Yes                     | Yes                 |
| 2        | Male   | 66        | Melanoma              | Yes             | No                      | No                      | No                      | No                  |
| 3        | Female | 72        | Ca cervix             | Yes             | No                      | Yes                     | No                      | No                  |
| 4        | Female | 67        | Medullary ca          | Yes             | No                      | No                      | Yes                     | Yes                 |
| 5        | Female | 74        | Ca lung               | Yes             | Yes                     | No                      | No                      | Yes                 |
| 6        | Male   | 74        | Neuroendocrine tumour | Yes             | Yes                     | No                      | No                      | No                  |
| 7        | Male   | 69        | Ca prostate           | Yes             | No                      | Yes                     | Yes                     | Yes                 |
| 8        | Male   | 71        | Ca nasopharynx        | No              | No                      | Yes                     | No                      | No                  |
| 9        | Female | 51        | Ca thyroid            | No              | No                      | Yes                     | No                      | Yes                 |
| 10       | Female | 37        | Scs tongue            | No              | No                      | No                      | No                      | No                  |
| 11       | Female | 62        | Ca breast             | No              | No                      | No                      | Yes                     | No                  |

Supplementary table 1: Phase 1 participant demographic data

Supplementary Table 2: Missing data management

| Questionnaire       | Variable measured                      | Missing Data                                                             | Statistical test            |
|---------------------|----------------------------------------|--------------------------------------------------------------------------|-----------------------------|
| EQ-5D – 3D          | QoL                                    | No computation if values missing as single scores                        |                             |
| QLQ-C30             | QoL                                    | Values computed if < or = 10% data missing. Calculated mean for subscore |                             |
| DASS-21             | Depression, Anxiety, Stress            |                                                                          | Friedman (missing listwise) |
| AAQ II              | Psychological flexibility              |                                                                          | Friedman (missing listwise) |
| POMs                | Mood state                             |                                                                          | Friedman (missing listwise) |
| SCS                 | Self-compassion                        |                                                                          | Friedman (missing listwise) |
| WEBWBS/Ad<br>WEMWBS | Mental well-being                      |                                                                          | Friedman (missing listwise) |
| Locally developed Q | Self-compassion after intervention use |                                                                          | Friedman (missing listwise) |

**Supplementary Table 3: Descriptive Statistics Questionnaire Domain Scores**

| QUESTIONNAIRES & DOMAINS                       | N  | Mean   | Std. Dev. | Min    | Max    |
|------------------------------------------------|----|--------|-----------|--------|--------|
| <b>EQ-5D-5L</b>                                |    |        |           |        |        |
| <b>MOBILITY</b>                                |    |        |           |        |        |
| B_EQ5DM                                        | 12 | 1.33   | .49       | 1      | 2      |
| VR1_EQ5DM                                      | 12 | 1.33   | .49       | 1      | 2      |
| VR2_EQ5DM                                      | 12 | 1.33   | .49       | 1      | 2      |
| VR3_EQ5DM                                      | 12 | 1.33   | .49       | 1      | 2      |
| <b>SELF-CARE</b>                               |    |        |           |        |        |
| B_EQ5DSC                                       | 12 | 1.25   | .45       | 1      | 2      |
| VR1_EQ5DSC                                     | 12 | 1.25   | .45       | 1      | 2      |
| VR2_EQ5DSC                                     | 12 | 1.17   | .39       | 1      | 2      |
| VR3_EQ5DSC                                     | 12 | 1.17   | .39       | 1      | 2      |
| <b>USUAL ACTIVITIES</b>                        |    |        |           |        |        |
| B_EQ5DUA                                       | 12 | 1.58   | .52       | 1      | 2      |
| VR1_EQ5DUA                                     | 12 | 1.58   | .52       | 1      | 2      |
| VR2_EQ5DUA                                     | 12 | 1.42   | .52       | 1      | 2      |
| VR3_EQ5DUA                                     | 12 | 1.42   | .52       | 1      | 2      |
| <b>PAIN &amp; DISCOMFORT</b>                   |    |        |           |        |        |
| B_EQ5DPD                                       | 12 | 1.50   | .67       | 1      | 3      |
| VR1_EQ5DPD                                     | 12 | 1.58   | .67       | 1      | 3      |
| VR2_EQ5DPD                                     | 12 | 1.33   | .49       | 1      | 2      |
| VR3_EQ5DPD                                     | 12 | 1.67   | .65       | 1      | 3      |
| <b>ANXIETY &amp; DEPRESSION</b>                |    |        |           |        |        |
| B_EQ5DAD                                       | 12 | 1.42   | .52       | 1      | 2      |
| VR1_EQ5DAD                                     | 12 | 1.42   | .52       | 1      | 2      |
| VR2_EQ5DAD                                     | 12 | 1.42   | .52       | 1      | 2      |
| VR3_EQ5DAD                                     | 12 | 1.42   | .67       | 1      | 3      |
| <b>BAROMETER / VAS</b>                         |    |        |           |        |        |
| B_BAROMETER                                    | 12 | 71.83  | 15.30     | 50     | 100    |
| VR1_BAROMETER                                  | 12 | 71.00  | 15.09     | 50     | 100    |
| VR2_BAROMETER                                  | 12 | 72.17  | 16.68     | 40     | 100    |
| VR3_BAROMETER                                  | 12 | 67.50  | 20.62     | 29     | 100    |
| <b>QLQ C30 – EORTC QoL</b>                     |    |        |           |        |        |
| <b>GLOBAL HEALTH SCORE</b>                     |    |        |           |        |        |
| BQLQC30GHS                                     | 11 | -43.18 | 25.77     | -83.33 | -8.33  |
| VR1QLQC30GHS                                   | 11 | -43.94 | 22.39     | -83.33 | -8.33  |
| VR2QLQC30GHS                                   | 11 | -48.48 | 23.51     | -83.33 | -16.67 |
| VR3QLQC30GHS                                   | 11 | -48.48 | 23.81     | -83.33 | -16.67 |
| <b>FUNCTIONAL SCALE</b>                        |    |        |           |        |        |
| BQLQC30FS                                      | 11 | 7.07   | 24.05     | -42.22 | 33.33  |
| VR1QLQC30FS                                    | 11 | 4.44   | 23.83     | -42.22 | 33.33  |
| VR2QLQC30FS                                    | 11 | 7.47   | 24.10     | -44.44 | 33.33  |
| VR3QLQC30FS                                    | 11 | 7.27   | 24.93     | -46.67 | 33.33  |
| <b>SYMPTOM SCORE</b>                           |    |        |           |        |        |
| BQLQC30SS                                      | 11 | 10.02  | 21.13     | -35.90 | 30.77  |
| VR1QLQC30SS                                    | 11 | 8.39   | 20.13     | -35.90 | 30.77  |
| VR2QLQC30SS                                    | 11 | 10.26  | 21.54     | -43.59 | 33.33  |
| VRQLQC30SS                                     | 11 | 10.02  | 21.62     | -43.59 | 33.33  |
| <b>DASS21 – DEPRESSION, ANXIETY, STRESS 21</b> |    |        |           |        |        |
| <b>DEPRESSION</b>                              |    |        |           |        |        |
| BDASDEP                                        | 11 | 9.09   | 9.01      | 0      | 28     |
| VR1DASDEP                                      | 11 | 8.91   | 9.05      | 0      | 28     |
| VR2DASDEP                                      | 11 | 8.73   | 8.40      | 0      | 24     |

|    |                                                    |    |       |       |      |      |
|----|----------------------------------------------------|----|-------|-------|------|------|
| 1  | VR3DASDEP                                          | 11 | 6.91  | 7.34  | 0    | 18   |
| 2  | <b>ANXIETY</b>                                     |    |       |       |      |      |
| 3  | BDASANX                                            | 10 | 8.00  | 8.79  | 0    | 30   |
| 4  | VR1DASANX                                          | 10 | 6.60  | 5.82  | 0    | 16   |
| 5  | VR2DASANX                                          | 10 | 7.40  | 6.33  | 0    | 18   |
| 6  | VR3DASANX                                          | 10 | 4.60  | 3.53  | 0    | 10   |
| 7  | <b>STRESS</b>                                      |    |       |       |      |      |
| 8  | BDASSTRS                                           | 19 | 13.37 | 8.11  | 0    | 28   |
| 9  | BDASDEP                                            | 19 | 7.68  | 8.41  | 0    | 28   |
| 10 | BDASANX                                            | 18 | 7.89  | 7.62  | 0    | 30   |
| 11 | VR3DASSTRS                                         | 13 | 8.15  | 7.89  | 0    | 24   |
| 12 | VR3DASDEP                                          | 12 | 6.67  | 7.05  | 0    | 18   |
| 13 | VR3DASANX                                          | 11 | 4.36  | 3.44  | 0    | 10   |
| 14 | <b>AAQ – ACTION &amp; ACCEPTANCE QUESTIONNAIRE</b> |    |       |       |      |      |
| 15 | BTOTAAQ                                            | 12 | 18.75 | 9.30  | 7    | 41   |
| 16 | VR1TAAQ                                            | 12 | 19.25 | 8.85  | 7    | 39   |
| 17 | VR2TAAQ                                            | 12 | 21.08 | 10.80 | 7    | 43   |
| 18 | VR3TAAQ                                            | 12 | 18.08 | 9.06  | 7    | 39   |
| 19 | <b>POMS – PROFILE OF MOOD STATE</b>                |    |       |       |      |      |
| 20 | VR1PREPOM                                          | 19 | 20.42 | 5.79  | 12   | 36   |
| 21 | VR2PREPOMS                                         | 16 | 21.50 | 7.14  | 9    | 39   |
| 22 | VR3PREPOMS                                         | 13 | 23.62 | 6.97  | 17   | 36   |
| 23 | VR1POSTPOM                                         | 18 | 23.06 | 6.91  | 8    | 36   |
| 24 | VR2POSTPOM                                         | 13 | 22.38 | 4.25  | 16   | 31   |
| 25 | VR3POSTPOM                                         | 13 | 23.31 | 6.74  | 17   | 39   |
| 26 | <b>SCS – SELF-COMPASSION SCALE</b>                 |    |       |       |      |      |
| 27 | <b>SELF-KINDNESS</b>                               |    |       |       |      |      |
| 28 | BSCSSK                                             | 10 | 3.14  | .811  | 2.00 | 4.40 |
| 29 | VR1SCSSK                                           | 10 | 3.14  | .79   | 2.00 | 4.20 |
| 30 | VR2SCSSK                                           | 10 | 3.26  | .92   | 1.8  | 5.0  |
| 31 | VR3SCSSK                                           | 10 | 3.30  | 1.13  | 1.8  | 5.0  |
| 32 | <b>SELF-JUDGEMENT</b>                              |    |       |       |      |      |
| 33 | BSCSSJ                                             | 10 | 3.48  | 1.05  | 1.40 | 4.80 |
| 34 | VR1SCSSJ                                           | 10 | 3.48  | 1.05  | 1.40 | 4.80 |
| 35 | VR2SCSSJ                                           | 10 | 3.34  | 1.30  | 1.0  | 5.0  |
| 36 | VR3SCSSJ                                           | 10 | 3.50  | 1.14  | 1.6  | 5.0  |
| 37 | <b>COMMON HUMANITY</b>                             |    |       |       |      |      |
| 38 | BSCSCH                                             | 10 | 3.13  | .68   | 2.25 | 4.25 |
| 39 | VR1SCSCH                                           | 10 | 3.23  | .79   | 2.25 | 4.75 |
| 40 | VR2SCSCH                                           | 10 | 2.90  | 1.12  | 1.25 | 4.50 |
| 41 | VR3SCSCH                                           | 10 | 3.15  | 1.04  | 1.50 | 5.00 |
| 42 | <b>ISOLATION</b>                                   |    |       |       |      |      |
| 43 | BSCSISO                                            | 10 | 3.30  | 1.14  | 1.75 | 5.00 |
| 44 | VR1SCSISO                                          | 10 | 3.38  | 1.13  | 1.75 | 5.00 |
| 45 | VR2SCSISO                                          | 10 | 3.43  | 1.13  | 1.75 | 5.00 |
| 46 | VR3SCSISO                                          | 10 | 3.58  | 1.24  | 1.50 | 5.00 |
| 47 | <b>MINDFULNESS</b>                                 |    |       |       |      |      |
| 48 | BSCSM                                              | 10 | 4.10  | .74   | 3    | 5    |
| 49 | VR1SSCSM                                           | 10 | 4.05  | .64   | 2.75 | 5.00 |
| 50 | VR2SSCSM                                           | 10 | 3.73  | .76   | 2.75 | 5.00 |
| 51 | VR3SSCSM                                           | 10 | 3.75  | .82   | 2.75 | 5.00 |
| 52 | <b>OVER-IDENTIFIED</b>                             |    |       |       |      |      |
| 53 | BSCSOI                                             | 10 | 3.30  | 1.12  | 1.50 | 5.00 |
| 54 | VR1SCSOI                                           | 10 | 3.35  | 1.14  | 1.50 | 5.00 |
| 55 | VR2SCSOI                                           | 10 | 3.70  | 1.26  | 1.50 | 5.00 |

|                                                                   |    |       |       |      |      |
|-------------------------------------------------------------------|----|-------|-------|------|------|
| VR3SCSOI                                                          | 10 | 3.58  | 1.24  | 1.50 | 5.00 |
| <b>LDL – LOCALLY DEVELOPED QUESTIONS</b>                          |    |       |       |      |      |
| VR1LDQTS                                                          | 12 | 51.08 | 15.92 | 33   | 80   |
| VR2LDQTS                                                          | 12 | 50.67 | 14.75 | 36   | 77   |
| VR3LDQTS                                                          | 12 | 50.50 | 17.42 | 14   | 77   |
| <b>WEMWBS WARWICK-EDINBURGH MENTAL WELL-BEING SCALE</b>           |    |       |       |      |      |
| BWEMTS                                                            | 19 | 48.74 | 8.92  | 34   | 67   |
| VR1TWEWM                                                          | 19 | 48.58 | 9.17  | 34   | 67   |
| VR2WEMWTS                                                         | 15 | 48.13 | 9.48  | 37   | 70   |
| VR3WEMWTS                                                         | 13 | 49.46 | 10.44 | 39   | 70   |
| <b>AWEMWBS – ADAPTED WARWICK-EDINBURGH METAL WELL-BEING SCALE</b> |    |       |       |      |      |
| VR1TAWEM                                                          | 18 | 53.00 | 8.24  | 36   | 70   |
| 2AWEMTS                                                           | 14 | 54.43 | 12.64 | 37   | 85   |
| VR3AWEMTS                                                         | 13 | 52.69 | 8.98  | 39   | 70   |
| BWEMTS                                                            | 12 | 45.92 | 7.76  | 34   | 58   |
| VR1TAWEM                                                          | 12 | 51.67 | 8.66  | 36   | 70   |
| 2AWEMTS                                                           | 12 | 54.00 | 13.52 | 37   | 85   |
| VR3AWEMTS                                                         | 12 | 52.83 | 9.36  | 39   | 70   |

peer review only



Supplementary table 4: Number of missing variables (number of participants)

| Measure                                                     | Baseline | VR1              | VR1               | VR2              | VR2               | VR3              | VR3               |
|-------------------------------------------------------------|----------|------------------|-------------------|------------------|-------------------|------------------|-------------------|
|                                                             |          | Pre intervention | Post intervention | Pre intervention | Post intervention | Pre intervention | Post intervention |
| EQ-5D                                                       | 0        | 0                | N/A               | 0                | N/A               | 0                | N/A               |
| QLQ C30                                                     | 0        | 0                | N/A               | 2(2)             | N/A               | 0                | N/A               |
| Action and Acceptance Questionnaire II - AAQII              | 0        | 0                | N/A               | 4(2)             | N/A               | 0                | N/A               |
| Depression, Anxiety and Stress Scale 21 – DASS21            | 7(3)     | 8(2)             | N/A               | 2(2)             | N/A               | 14(2)            | N/A               |
| Profile of Mood State - POMS                                | 6 (2)    | 8(3)             | 5(3)              | 9(3)             | 6(2)              | 1                | 2(2)              |
| Warwick Edinburgh Mental Well-being Scale - WEMWBS          | 1        | 2(1)             |                   | 0                | N/A               | 0                |                   |
| Self-compassion Scale - SCS                                 | 23 (1)   | 2(1)             | N/A               | 0                | N/A               | 0                | N/A               |
| Adapted Warwick Edinburgh Mental Well-being Scale - AWEMWBS | N/A      | N/A              | 0                 | N/A              | 0                 | N/A              | 1                 |
| Locally developed questionnaire                             | N/A      | N/A              | 0                 | N/A              | 1                 | N/A              | 0                 |

**Supplementary Table 5:** Multivariate analyses comparing baseline, VR1, VR2 and VR3 session scores

Friedman Test for EQ-5D-5L, QLQ C30 EORTC, DASS21, AAQ, SCS, LDQ, WEMWBS, AWEMWBS and Heart Rate Variation

| Ranks               |        |                     |        |                     |        |                     |        |
|---------------------|--------|---------------------|--------|---------------------|--------|---------------------|--------|
| Domain              | M Rank |
| B_EQ5DM             | 2.50   | B_EQ5DSC            | 2.58   | B_EQ5DUA            | 2.67   | B_EQ5DPD            | 2.46   |
| VR1_EQ5DM           | 2.50   | VR1_EQ5DSC          | 2.58   | VR1_EQ5DUA          | 2.67   | VR1_EQ5DPD          | 2.63   |
| VR2_EQ5DM           | 2.50   | VR2_EQ5DSC          | 2.42   | VR2_EQ5DUA          | 2.33   | VR2_EQ5DPD          | 2.13   |
| VR3_EQ5DM           | 2.50   | VR3_EQ5DSC          | 2.42   | VR3_EQ5DUA          | 2.33   | VR3_EQ5DPD          | 2.79   |
| <b>N</b>            | 12     | <b>N</b>            | 12     | <b>N</b>            | 12     | <b>N</b>            | 12     |
| <b>Chi-Square</b>   | .000   | <b>Chi-Square</b>   | 2.000  | <b>Chi-Square</b>   | 6.000  | <b>Chi-Square</b>   | 5.526  |
| <b>df</b>           | 3      | <b>df</b>           | 3      | <b>df</b>           | 3      | <b>df</b>           | 3      |
| <b>Asymp. Sign.</b> | 1.000  | <b>Asymp. Sign.</b> | .572   | <b>Asymp. Sign.</b> | .112   | <b>Asymp. Sign.</b> | .137   |
| Domain              | M Rank |
| B_EQ5DAD            | 2.50   | B_BAROMETER         | 2.63   | BQLQC30GHS          | 2.82   |                     |        |
| VR1_EQ5DAD          | 2.50   | VR1_BAROMETER       | 2.42   | VR1QLQC30GHS        | 2.82   |                     |        |
| VR2_EQ5DAD          | 2.50   | VR2_BAROMETER       | 2.67   | VR2QLQC30GHS        | 2.27   |                     |        |
| VR3_EQ5DAD          | 2.50   | VR3_BAROMETER       | 2.29   | VR3QLQC30GHS        | 2.09   |                     |        |
| <b>N</b>            | 12     | <b>N</b>            | 12     | <b>N</b>            | 11     |                     |        |
| <b>Chi-Square</b>   | .000   | <b>Chi-Square</b>   | .880   | <b>Chi-Square</b>   | 4.935  |                     |        |
| <b>df</b>           | 3      | <b>df</b>           | 3      | <b>df</b>           | 3      |                     |        |
| <b>Asymp. Sign.</b> | 1.000  | <b>Asymp. Sign.</b> | .830   | <b>Asymp. Sign.</b> | .177   |                     |        |
| Domain              | M Rank |
| BQLQC30FS           | 2.41   | BQLQC30SS           | 2.64   | BDASDEP             | 2.59   |                     |        |
| VR1QLQC30FS         | 2.18   | VR1QLQC30SS         | 2.00   | VR1DASDEP           | 2.45   |                     |        |
| VR2QLQC30FS         | 2.64   | VR2QLQC30SS         | 2.77   | VR2DASDEP           | 2.59   |                     |        |
| VR3QLQC30FS         | 2.77   | VRQLQC30SS          | 2.59   | VR3DASDEP           | 2.36   |                     |        |
| <b>N</b>            | 11     | <b>N</b>            | 11     | <b>N</b>            | 11     |                     |        |
| <b>Chi-Square</b>   | 1.709  | <b>Chi-Square</b>   | 3.000  | <b>Chi-Square</b>   | .365   |                     |        |
| <b>df</b>           | 3      | <b>df</b>           | 3      | <b>df</b>           | 3      |                     |        |
| <b>Asymp. Sign.</b> | .635   | <b>Asymp. Sign.</b> | .392   | <b>Asymp. Sign.</b> | .947   |                     |        |
| Domain              | M Rank |
| BDASANX             | 2.75   | BDASSTRS            | 2.96   | BTOTAAQ             | 2.38   |                     |        |
| VR1DASANX           | 2.50   | VR1DASSTRS          | 2.92   | VR1TAAQ             | 2.63   |                     |        |
| VR2DASANX           | 2.80   | VR2DASSTRS          | 2.38   | VR2TAAQ             | 3.04   |                     |        |
| VR3DASANX           | 1.95   | VR3DASSTRS          | 1.75   | VR3TAAQ             | 1.96   |                     |        |
| <b>N</b>            | 10     | <b>N</b>            | 12     | <b>N</b>            | 12     |                     |        |
| <b>Chi-Square</b>   | 4.789  | <b>Chi-Square</b>   | 8.656  | <b>Chi-Square</b>   | 5.742  |                     |        |
| <b>df</b>           | 3      | <b>df</b>           | 3      | <b>df</b>           | 3      |                     |        |
| <b>Asymp. Sign.</b> | .188   | <b>Asymp. Sign.</b> | .034   | <b>Asymp. Sign.</b> | .125   |                     |        |
| Domain              | M Rank |
| BSCSSK              | 2.50   | BSCSSJ              | 2.25   | BSCSCH              | 2.25   |                     |        |
| VR1SCSSK            | 2.45   | VR1SCSSJ            | 2.25   | VR1SCSCH            | 2.65   |                     |        |
| VR2SCSSK            | 2.30   | VR2SCSSJ            | 2.60   | VR2SCSCH            | 2.40   |                     |        |
| VR3SCSSK            | 2.75   | VR3SCSSJ            | 2.90   | VR3SCSCH            | 2.70   |                     |        |
| <b>N</b>            | 10     | <b>N</b>            | 10     | <b>N</b>            | 10     |                     |        |
| <b>Chi-Square</b>   | .733   | <b>Chi-Square</b>   | 2.133  | <b>Chi-Square</b>   | .976   |                     |        |
| <b>df</b>           | 3      | <b>df</b>           | 3      | <b>df</b>           | 3      |                     |        |
| <b>Asymp. Sign.</b> | .866   | <b>Asymp. Sign.</b> | .545   | <b>Asymp. Sign.</b> | .807   |                     |        |
| Domain              | M Rank |
| BSCSISO             | 2.20   | BSCSM               | 2.90   | BSCSOI              | 2.05   |                     |        |

|                     |               |                     |               |                     |               |
|---------------------|---------------|---------------------|---------------|---------------------|---------------|
| VR1SCSISO           | 2.40          | VR1SSCSM            | 2.90          | VR1SCSOI            | 2.25          |
| VR2SCSISO           | 2.75          | VR2SSCSM            | 2.05          | VR2SCSOI            | 2.95          |
| VR3SCSISO           | 2.65          | VR3SSCSM            | 2.15          | VR3SCSOI            | 2.75          |
| <b>N</b>            | 10            | <b>N</b>            | 10            | <b>N</b>            | 10            |
| <b>Chi-Square</b>   | 2.018         | <b>Chi-Square</b>   | 5.230         | <b>Chi-Square</b>   | 4.417         |
| <b>df</b>           | 3             | <b>df</b>           | 3             | <b>df</b>           | 3             |
| <b>Asymp. Sign.</b> | .569          | <b>Asymp. Sign.</b> | .156          | <b>Asymp. Sign.</b> | .220          |
| <b>Domain</b>       | <b>M Rank</b> | <b>Domain</b>       | <b>M Rank</b> | <b>Domain</b>       | <b>M Rank</b> |
| VR1LDQTS            | 2.13          | BWEMTS              | 1.38          | VR1 HRV Pre         | 2.00          |
| VR2LDQTS            | 1.83          | VR1TAWEM            | 2.75          | VR1 HRV Mid         | 2.00          |
| VR3LDQTS            | 2.04          | 2AWEMTS             | 2.83          | VR1 HRV Post        | 2.00          |
| VR1LDQTS            | 2.13          | VR3AWEMTS           | 3.04          | VR1 HRV Pre         | 2.00          |
| <b>N</b>            | 12            | <b>N</b>            | 12            | <b>N</b>            | 3             |
| <b>Chi-Square</b>   | .565          | <b>Chi-Square</b>   | 12.905        | <b>Chi-Square</b>   | .000          |
| <b>df</b>           | 2             | <b>df</b>           | 3             | <b>df</b>           | 2             |
| <b>Asymp. Sign.</b> | .754          | <b>Asymp. Sign.</b> | .005          | <b>Asymp. Sign.</b> | 1.000         |
|                     |               |                     |               |                     |               |

**Supplementary Table 6:** Multi-variate analyses comparing baseline to VR3 session scores

Wilcoxon Signed Ranks Test for DASS21, AAQ, WEMWBS & AWEMWBS, POMS and SSC

| DASS21                         |                           | N                          | Mean Rank                  | Sum of Ranks |
|--------------------------------|---------------------------|----------------------------|----------------------------|--------------|
| <b>VR3DASSTRS - BDASSTRS</b>   | Negative Ranks            | 9 <sup>a</sup>             | 6.33                       | 57.00        |
|                                | Positive Ranks            | 2 <sup>b</sup>             | 4.50                       | 9.00         |
|                                | Ties                      | 2 <sup>c</sup>             |                            |              |
|                                | Total                     | 13                         |                            |              |
| <b>VR3DASDEP - BDASDEP</b>     | Negative Ranks            | 5 <sup>d</sup>             | 5.20                       | 26.00        |
|                                | Positive Ranks            | 4 <sup>e</sup>             | 4.75                       | 19.00        |
|                                | Ties                      | 3 <sup>f</sup>             |                            |              |
|                                | Total                     | 12                         |                            |              |
| <b>VR3DASANX - BDASANX</b>     | Negative Ranks            | 5 <sup>g</sup>             | 3.00                       | 15.00        |
|                                | Positive Ranks            | 0 <sup>h</sup>             | .00                        | .00          |
|                                | Ties                      | 6 <sup>i</sup>             |                            |              |
|                                | Total                     | 11                         |                            |              |
| <b>Test statistics</b>         |                           |                            |                            |              |
|                                | VR3DASSTRS -<br>BDASSTRS  | VR3DASDEP -<br>BDASDEP     | VR3DASANX –<br>BDASANX     |              |
| <b>Z</b>                       | -2.138 <sup>b</sup>       | -.418 <sup>b</sup>         | -2.032 <sup>b</sup>        |              |
| <b>Asymp. Sig. (2-tailed)</b>  | .033                      | .676                       | .042                       |              |
| <b>AAQ</b>                     |                           |                            |                            |              |
|                                |                           | N                          | Mean Rank                  | Sum of Ranks |
| <b>VR1POSTPOM - VR1PREPOM</b>  | Negative Ranks            | 2 <sup>a</sup>             | 7.50                       | 15.00        |
|                                | Positive Ranks            | 11 <sup>b</sup>            | 6.91                       | 76.00        |
|                                | Ties                      | 5 <sup>c</sup>             |                            |              |
|                                | Total                     | 18                         |                            |              |
| <b>VR2POSTPOM - VR2PREPOMS</b> | Negative Ranks            | 6 <sup>d</sup>             | 4.17                       | 25.00        |
|                                | Positive Ranks            | 4 <sup>e</sup>             | 7.50                       | 30.00        |
|                                | Ties                      | 3 <sup>f</sup>             |                            |              |
|                                | Total                     | 13                         |                            |              |
| <b>VR3POSTPOM - VR3PREPOMS</b> | Negative Ranks            | 4 <sup>g</sup>             | 3.00                       | 12.00        |
|                                | Positive Ranks            | 2 <sup>h</sup>             | 4.50                       | 9.00         |
|                                | Ties                      | 7 <sup>i</sup>             |                            |              |
|                                | Total                     | 13                         |                            |              |
| <b>Test statistics</b>         |                           |                            |                            |              |
|                                | VR1POSTPOM -<br>VR1PREPOM | VR2POSTPOM -<br>VR2PREPOMS | VR3POSTPOM –<br>VR3PREPOMS |              |
| <b>Z</b>                       | -2.136 <sup>b</sup>       | -.255 <sup>b</sup>         | -.315 <sup>c</sup>         |              |
| <b>Asymp. Sig. (2-tailed)</b>  | .033                      | .799                       | .752                       |              |
| <b>WEMWBS &amp; AWEMWBS</b>    |                           |                            |                            |              |
|                                |                           | N                          | Mean Rank                  | Sum of Ranks |
| <b>VR1TAWEM - VR1TWEWM</b>     | Negative Ranks            | 2 <sup>d</sup>             | 5.00                       | 10.00        |
|                                | Positive Ranks            | 13 <sup>e</sup>            | 8.46                       | 110.00       |
|                                | Ties                      | 3 <sup>f</sup>             |                            |              |
|                                | Total                     | 18                         |                            |              |
| <b>2AWEMTS - VR2WEMWTS</b>     | Negative Ranks            | 2 <sup>g</sup>             | 1.50                       | 3.00         |
|                                | Positive Ranks            | 8 <sup>h</sup>             | 6.50                       | 52.00        |

|                                                                                                                                                                                                                                                                                                                                                                                                                                                                                                                                                                                                                                                                                                            | Ties                      |                      | 4 <sup>i</sup>             |                        |                            |                      |            |                      |                      |                      |                        |                     |                      |          |                     |                    |                    |                     |                     |                     |                               |      |      |      |      |      |      |
|------------------------------------------------------------------------------------------------------------------------------------------------------------------------------------------------------------------------------------------------------------------------------------------------------------------------------------------------------------------------------------------------------------------------------------------------------------------------------------------------------------------------------------------------------------------------------------------------------------------------------------------------------------------------------------------------------------|---------------------------|----------------------|----------------------------|------------------------|----------------------------|----------------------|------------|----------------------|----------------------|----------------------|------------------------|---------------------|----------------------|----------|---------------------|--------------------|--------------------|---------------------|---------------------|---------------------|-------------------------------|------|------|------|------|------|------|
|                                                                                                                                                                                                                                                                                                                                                                                                                                                                                                                                                                                                                                                                                                            | Total                     |                      | 14                         |                        |                            |                      |            |                      |                      |                      |                        |                     |                      |          |                     |                    |                    |                     |                     |                     |                               |      |      |      |      |      |      |
| <b>VR3AWEMTS - VR3WEMWTS</b>                                                                                                                                                                                                                                                                                                                                                                                                                                                                                                                                                                                                                                                                               | Negative Ranks            |                      | 1 <sup>j</sup>             | 1.50                   | 1.50                       |                      |            |                      |                      |                      |                        |                     |                      |          |                     |                    |                    |                     |                     |                     |                               |      |      |      |      |      |      |
|                                                                                                                                                                                                                                                                                                                                                                                                                                                                                                                                                                                                                                                                                                            | Positive Ranks            |                      | 8 <sup>k</sup>             | 5.44                   | 43.50                      |                      |            |                      |                      |                      |                        |                     |                      |          |                     |                    |                    |                     |                     |                     |                               |      |      |      |      |      |      |
|                                                                                                                                                                                                                                                                                                                                                                                                                                                                                                                                                                                                                                                                                                            | Ties                      |                      | 4 <sup>l</sup>             |                        |                            |                      |            |                      |                      |                      |                        |                     |                      |          |                     |                    |                    |                     |                     |                     |                               |      |      |      |      |      |      |
|                                                                                                                                                                                                                                                                                                                                                                                                                                                                                                                                                                                                                                                                                                            | Total                     |                      | 13                         |                        |                            |                      |            |                      |                      |                      |                        |                     |                      |          |                     |                    |                    |                     |                     |                     |                               |      |      |      |      |      |      |
| <b>Test statistics</b>                                                                                                                                                                                                                                                                                                                                                                                                                                                                                                                                                                                                                                                                                     |                           |                      |                            |                        |                            |                      |            |                      |                      |                      |                        |                     |                      |          |                     |                    |                    |                     |                     |                     |                               |      |      |      |      |      |      |
|                                                                                                                                                                                                                                                                                                                                                                                                                                                                                                                                                                                                                                                                                                            | VR1TAWEM -<br>VR1TWEWM    |                      | 2AWEMTS -<br>VR2WEMWTS     |                        | VR3AWEMTS -<br>VR3WEMWTS   |                      |            |                      |                      |                      |                        |                     |                      |          |                     |                    |                    |                     |                     |                     |                               |      |      |      |      |      |      |
| <b>Z</b>                                                                                                                                                                                                                                                                                                                                                                                                                                                                                                                                                                                                                                                                                                   |                           | -2.846 <sup>b</sup>  |                            | -2.501 <sup>b</sup>    |                            | -2.492 <sup>b</sup>  |            |                      |                      |                      |                        |                     |                      |          |                     |                    |                    |                     |                     |                     |                               |      |      |      |      |      |      |
| <b>Asymp. Sig. (2-tailed)</b>                                                                                                                                                                                                                                                                                                                                                                                                                                                                                                                                                                                                                                                                              |                           | .004                 |                            | .012                   |                            | .013                 |            |                      |                      |                      |                        |                     |                      |          |                     |                    |                    |                     |                     |                     |                               |      |      |      |      |      |      |
| <b>POMS</b>                                                                                                                                                                                                                                                                                                                                                                                                                                                                                                                                                                                                                                                                                                |                           |                      |                            |                        |                            |                      |            |                      |                      |                      |                        |                     |                      |          |                     |                    |                    |                     |                     |                     |                               |      |      |      |      |      |      |
|                                                                                                                                                                                                                                                                                                                                                                                                                                                                                                                                                                                                                                                                                                            |                           |                      | <b>N</b>                   | <b>Mean Rank</b>       | <b>Sum of Ranks</b>        |                      |            |                      |                      |                      |                        |                     |                      |          |                     |                    |                    |                     |                     |                     |                               |      |      |      |      |      |      |
| <b>VR1POSTPOM - VR1PREPOM</b>                                                                                                                                                                                                                                                                                                                                                                                                                                                                                                                                                                                                                                                                              | Negative Ranks            |                      | 2 <sup>a</sup>             | 7.50                   | 15.00                      |                      |            |                      |                      |                      |                        |                     |                      |          |                     |                    |                    |                     |                     |                     |                               |      |      |      |      |      |      |
|                                                                                                                                                                                                                                                                                                                                                                                                                                                                                                                                                                                                                                                                                                            | Positive Ranks            |                      | 11 <sup>b</sup>            | 6.91                   | 76.00                      |                      |            |                      |                      |                      |                        |                     |                      |          |                     |                    |                    |                     |                     |                     |                               |      |      |      |      |      |      |
|                                                                                                                                                                                                                                                                                                                                                                                                                                                                                                                                                                                                                                                                                                            | Ties                      |                      | 5 <sup>c</sup>             |                        |                            |                      |            |                      |                      |                      |                        |                     |                      |          |                     |                    |                    |                     |                     |                     |                               |      |      |      |      |      |      |
|                                                                                                                                                                                                                                                                                                                                                                                                                                                                                                                                                                                                                                                                                                            | Total                     |                      | 18                         |                        |                            |                      |            |                      |                      |                      |                        |                     |                      |          |                     |                    |                    |                     |                     |                     |                               |      |      |      |      |      |      |
| <b>VR2POSTPOM - VR2PREPOMS</b>                                                                                                                                                                                                                                                                                                                                                                                                                                                                                                                                                                                                                                                                             | Negative Ranks            |                      | 6 <sup>d</sup>             | 4.17                   | 25.00                      |                      |            |                      |                      |                      |                        |                     |                      |          |                     |                    |                    |                     |                     |                     |                               |      |      |      |      |      |      |
|                                                                                                                                                                                                                                                                                                                                                                                                                                                                                                                                                                                                                                                                                                            | Positive Ranks            |                      | 4 <sup>e</sup>             | 7.50                   | 30.00                      |                      |            |                      |                      |                      |                        |                     |                      |          |                     |                    |                    |                     |                     |                     |                               |      |      |      |      |      |      |
|                                                                                                                                                                                                                                                                                                                                                                                                                                                                                                                                                                                                                                                                                                            | Ties                      |                      | 3 <sup>f</sup>             |                        |                            |                      |            |                      |                      |                      |                        |                     |                      |          |                     |                    |                    |                     |                     |                     |                               |      |      |      |      |      |      |
|                                                                                                                                                                                                                                                                                                                                                                                                                                                                                                                                                                                                                                                                                                            | Total                     |                      | 13                         |                        |                            |                      |            |                      |                      |                      |                        |                     |                      |          |                     |                    |                    |                     |                     |                     |                               |      |      |      |      |      |      |
| <b>VR3POSTPOM - VR3PREPOMS</b>                                                                                                                                                                                                                                                                                                                                                                                                                                                                                                                                                                                                                                                                             | Negative Ranks            |                      | 4 <sup>g</sup>             | 3.00                   | 12.00                      |                      |            |                      |                      |                      |                        |                     |                      |          |                     |                    |                    |                     |                     |                     |                               |      |      |      |      |      |      |
|                                                                                                                                                                                                                                                                                                                                                                                                                                                                                                                                                                                                                                                                                                            | Positive Ranks            |                      | 2 <sup>h</sup>             | 4.50                   | 9.00                       |                      |            |                      |                      |                      |                        |                     |                      |          |                     |                    |                    |                     |                     |                     |                               |      |      |      |      |      |      |
|                                                                                                                                                                                                                                                                                                                                                                                                                                                                                                                                                                                                                                                                                                            | Ties                      |                      | 7 <sup>i</sup>             |                        |                            |                      |            |                      |                      |                      |                        |                     |                      |          |                     |                    |                    |                     |                     |                     |                               |      |      |      |      |      |      |
|                                                                                                                                                                                                                                                                                                                                                                                                                                                                                                                                                                                                                                                                                                            | Total                     |                      | 13                         |                        |                            |                      |            |                      |                      |                      |                        |                     |                      |          |                     |                    |                    |                     |                     |                     |                               |      |      |      |      |      |      |
| <b>Test statistics</b>                                                                                                                                                                                                                                                                                                                                                                                                                                                                                                                                                                                                                                                                                     |                           |                      |                            |                        |                            |                      |            |                      |                      |                      |                        |                     |                      |          |                     |                    |                    |                     |                     |                     |                               |      |      |      |      |      |      |
|                                                                                                                                                                                                                                                                                                                                                                                                                                                                                                                                                                                                                                                                                                            | VR1POSTPOM -<br>VR1PREPOM |                      | VR2POSTPOM -<br>VR2PREPOMS |                        | VR3POSTPOM -<br>VR3PREPOMS |                      |            |                      |                      |                      |                        |                     |                      |          |                     |                    |                    |                     |                     |                     |                               |      |      |      |      |      |      |
| <b>Z</b>                                                                                                                                                                                                                                                                                                                                                                                                                                                                                                                                                                                                                                                                                                   |                           | -2.136 <sup>b</sup>  |                            | -.255 <sup>b</sup>     |                            | -.315 <sup>c</sup>   |            |                      |                      |                      |                        |                     |                      |          |                     |                    |                    |                     |                     |                     |                               |      |      |      |      |      |      |
| <b>Asymp. Sig. (2-tailed)</b>                                                                                                                                                                                                                                                                                                                                                                                                                                                                                                                                                                                                                                                                              |                           | .033                 |                            | .799                   |                            | .752                 |            |                      |                      |                      |                        |                     |                      |          |                     |                    |                    |                     |                     |                     |                               |      |      |      |      |      |      |
| <table border="1" style="width: 100%; border-collapse: collapse;"> <thead> <tr> <th style="text-align: left;"><b>SSC</b></th> <th>VR3SCSSK -<br/>BSCSSK</th> <th>VR3SCSSJ -<br/>BSCSSJ</th> <th>VR3SCSCH -<br/>BSCSCH</th> <th>VR3SCSISO -<br/>BSCSISO</th> <th>VR3SSCSM -<br/>BSCSM</th> <th>VR3SCSOI -<br/>BSCSOI</th> </tr> </thead> <tbody> <tr> <td><b>Z</b></td> <td>-1.011<sup>b</sup></td> <td>-.978<sup>b</sup></td> <td>-.224<sup>c</sup></td> <td>-1.261<sup>b</sup></td> <td>-1.605<sup>c</sup></td> <td>-1.430<sup>b</sup></td> </tr> <tr> <td><b>Asymp. Sig. (2-tailed)</b></td> <td>.312</td> <td>.328</td> <td>.823</td> <td>.207</td> <td>.108</td> <td>.153</td> </tr> </tbody> </table> |                           |                      |                            |                        |                            |                      | <b>SSC</b> | VR3SCSSK -<br>BSCSSK | VR3SCSSJ -<br>BSCSSJ | VR3SCSCH -<br>BSCSCH | VR3SCSISO -<br>BSCSISO | VR3SSCSM -<br>BSCSM | VR3SCSOI -<br>BSCSOI | <b>Z</b> | -1.011 <sup>b</sup> | -.978 <sup>b</sup> | -.224 <sup>c</sup> | -1.261 <sup>b</sup> | -1.605 <sup>c</sup> | -1.430 <sup>b</sup> | <b>Asymp. Sig. (2-tailed)</b> | .312 | .328 | .823 | .207 | .108 | .153 |
| <b>SSC</b>                                                                                                                                                                                                                                                                                                                                                                                                                                                                                                                                                                                                                                                                                                 | VR3SCSSK -<br>BSCSSK      | VR3SCSSJ -<br>BSCSSJ | VR3SCSCH -<br>BSCSCH       | VR3SCSISO -<br>BSCSISO | VR3SSCSM -<br>BSCSM        | VR3SCSOI -<br>BSCSOI |            |                      |                      |                      |                        |                     |                      |          |                     |                    |                    |                     |                     |                     |                               |      |      |      |      |      |      |
| <b>Z</b>                                                                                                                                                                                                                                                                                                                                                                                                                                                                                                                                                                                                                                                                                                   | -1.011 <sup>b</sup>       | -.978 <sup>b</sup>   | -.224 <sup>c</sup>         | -1.261 <sup>b</sup>    | -1.605 <sup>c</sup>        | -1.430 <sup>b</sup>  |            |                      |                      |                      |                        |                     |                      |          |                     |                    |                    |                     |                     |                     |                               |      |      |      |      |      |      |
| <b>Asymp. Sig. (2-tailed)</b>                                                                                                                                                                                                                                                                                                                                                                                                                                                                                                                                                                                                                                                                              | .312                      | .328                 | .823                       | .207                   | .108                       | .153                 |            |                      |                      |                      |                        |                     |                      |          |                     |                    |                    |                     |                     |                     |                               |      |      |      |      |      |      |

**Supplementary Tables 6a & 6b:** Multi-variate analyses comparing VR session scores

ANOVA for Electrodermal Activity (EDA) and Heart Rate

**Supplementary Table 6a** Physiology Data – Electrodermal Activity (EDA) – VR 1 – Pre/Mid/Post

**DESCRIPTIVE STATISTICS**

|                                         | Mean               | Std. Deviation          | N     |             |        |      |                     |
|-----------------------------------------|--------------------|-------------------------|-------|-------------|--------|------|---------------------|
| <b>VR1 EDA PRE</b>                      | 11.50              | 3.416                   | 4     |             |        |      |                     |
| <b>VR1 EDA MID</b>                      | 8.75               | 2.217                   | 4     |             |        |      |                     |
| <b>VR1 EDA POST</b>                     | 8.25               | 2.062                   | 4     |             |        |      |                     |
| <b>TESTS OF WITHIN-SUBJECTS EFFECTS</b> |                    |                         |       |             |        |      |                     |
|                                         |                    |                         |       |             |        |      |                     |
| <b>SOURCE</b>                           |                    | Type III Sum of Squares | df    | Mean Square | F      | Sig. | Partial Eta Squared |
| <b>EDA1</b>                             | Sphericity Assumed | 24.500                  | 2     | 12.250      | 13.364 | .006 | .817                |
|                                         | Greenhouse-Geisser | 24.500                  | 1.658 | 14.781      | 13.364 | .011 | .817                |
|                                         | Huynh-Feldt        | 24.500                  | 2.000 | 12.250      | 13.364 | .006 | .817                |
|                                         | Lower-bound        | 24.500                  | 1.000 | 24.500      | 13.364 | .035 | .817                |
| <b>ERROR(EDA1)</b>                      | Sphericity Assumed | 5.500                   | 6     | .917        |        |      |                     |
|                                         | Greenhouse-Geisser | 5.500                   | 4.973 | 1.106       |        |      |                     |
|                                         | Huynh-Feldt        | 5.500                   | 6.000 | .917        |        |      |                     |
|                                         | Lower-bound        | 5.500                   | 3.000 | 1.833       |        |      |                     |

**Supplementary Table 6b** Physiology Data – Heart Rate – VR 2 – Pre/Mid/Post

| Descriptive Statistics           |                    |                         |       |             |        |      |                     |
|----------------------------------|--------------------|-------------------------|-------|-------------|--------|------|---------------------|
|                                  | Mean               | Std. Deviation          | N     |             |        |      |                     |
| VR2 HR Pre                       | 75.75              | 6.185                   | 4     |             |        |      |                     |
| VR2 HR Mid                       | 73.75              | 6.850                   | 4     |             |        |      |                     |
| VR2 HR Post                      | 75.00              | 6.683                   | 4     |             |        |      |                     |
| Tests of Within-Subjects Effects |                    |                         |       |             |        |      |                     |
| Source                           |                    | Type III Sum of Squares | df    | Mean Square | F      | Sig. | Partial Eta Squared |
| HR2                              | Sphericity Assumed | 8.167                   | 2     | 4.083       | 13.364 | .006 | .817                |
|                                  | Greenhouse-Geisser | 8.167                   | 1.424 | 5.737       | 13.364 | .017 | .817                |
|                                  | Huynh-Feldt        | 8.167                   | 2.000 | 4.083       | 13.364 | .006 | .817                |
|                                  | Lower-bound        | 8.167                   | 1.000 | 8.167       | 13.364 | .035 | .817                |
| Error(HR2)                       | Sphericity Assumed | 1.833                   | 6     | .306        |        |      |                     |
|                                  | Greenhouse-Geisser | 1.833                   | 4.271 | .429        |        |      |                     |
|                                  | Huynh-Feldt        | 1.833                   | 6.000 | .306        |        |      |                     |
|                                  | Lower-bound        | 1.833                   | 3.000 | .611        |        |      |                     |

|                   | Qualitative                                                                                                                                                                                                                                                                                                                                                                                                                | Quantitative                                                                                                                                                                                       |
|-------------------|----------------------------------------------------------------------------------------------------------------------------------------------------------------------------------------------------------------------------------------------------------------------------------------------------------------------------------------------------------------------------------------------------------------------------|----------------------------------------------------------------------------------------------------------------------------------------------------------------------------------------------------|
| Stress            | '... it takes you away from that situation, even if it's only for a few minutes, and it helps to calm when you're feeling anxious, as I think most patients are when they undergo cancer treatment.' Participant 013                                                                                                                                                                                                       | DASS-21: Statistically significant reduction in stress levels as measured by the DASS21 from baseline to post-session 3 ( $z = -2.138^b$ , $p = 0.03$ )                                            |
| Mental well-being | 'Very relaxed, very safe for the first one on the beach. It was 11/10. I truly enjoyed even though I was having treatment I enjoyed it. . . Participant 031                                                                                                                                                                                                                                                                | WEMWBS: Statistically significant changes to mental well-being from pre- to post-VR session (VR 1 $z = -2.846^b$ $p < 0.01$ ; VR 2 $z = -2.501^b$ $p < 0.01$ ; VR 3 $z = -2.492$ , $^8 p < 0.01$ ) |
| Mood              | '...did make me relax and gave me a break from the hustle and bustle of being in a hospital, so, it definitely, I definitely felt sort of calmer after using it...and more relaxed, a bit sort of more optimistic, that was the case.' Participant 026                                                                                                                                                                     | POMS: Statistically significant increase in total scores after the first session (VR 1) ( $z = -2.136$ , $^b p = 0.03$ )                                                                           |
| Acceptability     | ' I think that if it was something that I was putting on my head every single day or every other day I think that the positive effect would probably increase even more so.' Participant 017<br><br>'But I def think if I had the VR just like, at night, all the lights are off, I'd do VR for like 10 mins, then I'd be able to visualise the place I'd been like, the beach or whatever, and drift off. Participant 019 | 65%; 60% was deemed a safe option for acceptability purposes                                                                                                                                       |

Supplementary table 7 – Data synthesis



STUDY SET-UP – Supplementary flowchart 1

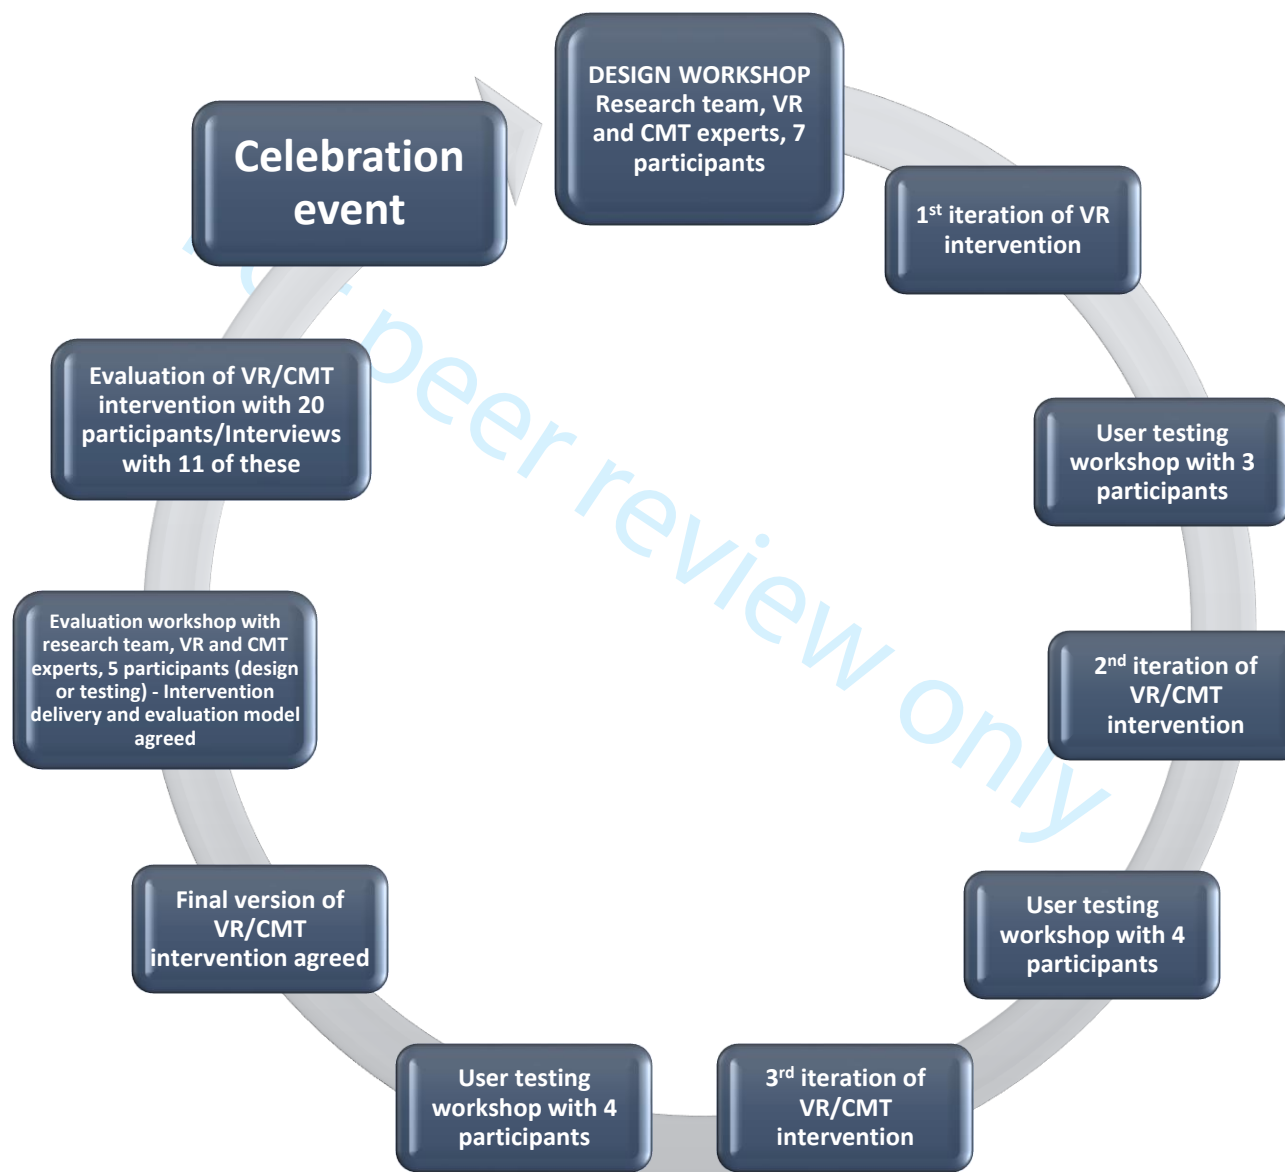

1  
2  
3  
4  
5  
6  
7  
8  
9  
10  
11  
12  
13  
14  
15  
16  
17  
18  
19  
20  
21  
22  
23  
24  
25  
26  
27  
28  
29  
30  
31  
32  
33  
34  
35  
36  
37  
38  
39  
40  
41  
42  
43  
44  
45  
46

**Supplementary flowchart 2 – Data triangulation**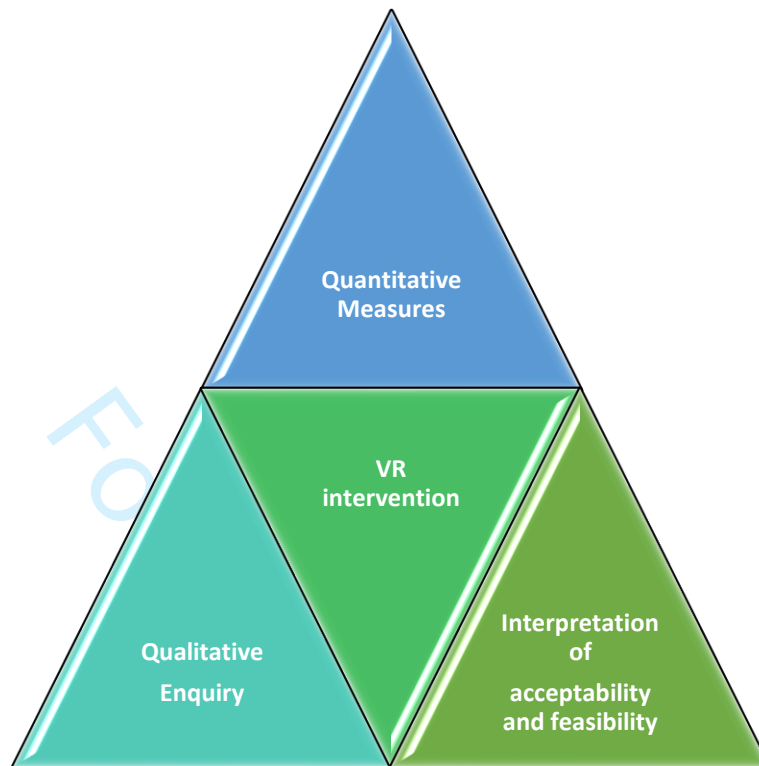

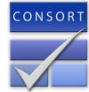

## CONSORT 2010 checklist of information to include when reporting a pilot or feasibility trial\*

| Section/Topic                    | Item No | Checklist item                                                                                                                                                                              | Reported on page No |
|----------------------------------|---------|---------------------------------------------------------------------------------------------------------------------------------------------------------------------------------------------|---------------------|
| <b>Title and abstract</b>        |         |                                                                                                                                                                                             |                     |
|                                  | 1a      | Identification as a pilot or feasibility randomised trial in the title                                                                                                                      | 1                   |
|                                  | 1b      | Structured summary of pilot trial design, methods, results, and conclusions (for specific guidance see CONSORT abstract extension for pilot trials)                                         | 4                   |
| <b>Introduction</b>              |         |                                                                                                                                                                                             |                     |
| Background and objectives        | 2a      | Scientific background and explanation of rationale for future definitive trial, and reasons for randomised pilot trial                                                                      | 4/5                 |
|                                  | 2b      | Specific objectives or research questions for pilot trial                                                                                                                                   | 6                   |
| <b>Methods</b>                   |         |                                                                                                                                                                                             |                     |
| Trial design                     | 3a      | Description of pilot trial design (such as parallel, factorial) including allocation ratio                                                                                                  | 6                   |
|                                  | 3b      | Important changes to methods after pilot trial commencement (such as eligibility criteria), with reasons                                                                                    | N/A                 |
| Participants                     | 4a      | Eligibility criteria for participants                                                                                                                                                       | 8                   |
|                                  | 4b      | Settings and locations where the data were collected                                                                                                                                        | 8                   |
|                                  | 4c      | How participants were identified and consented                                                                                                                                              | 8 and 14            |
| Interventions                    | 5       | The interventions for each group with sufficient details to allow replication, including how and when they were actually administered                                                       | 9 and 10            |
| Outcomes                         | 6a      | Completely defined prespecified assessments or measurements to address each pilot trial objective specified in 2b, including how and when they were assessed                                | 12                  |
|                                  | 6b      | Any changes to pilot trial assessments or measurements after the pilot trial commenced, with reasons                                                                                        | N/A                 |
|                                  | 6c      | If applicable, prespecified criteria used to judge whether, or how, to proceed with future definitive trial                                                                                 | 18                  |
| Sample size                      | 7a      | Rationale for numbers in the pilot trial                                                                                                                                                    | 13                  |
|                                  | 7b      | When applicable, explanation of any interim analyses and stopping guidelines                                                                                                                | N/A                 |
| Randomisation:                   |         |                                                                                                                                                                                             |                     |
| Sequence generation              | 8a      | Method used to generate the random allocation sequence                                                                                                                                      | N/A                 |
|                                  | 8b      | Type of randomisation(s); details of any restriction (such as blocking and block size)                                                                                                      | N/A                 |
| Allocation concealment mechanism | 9       | Mechanism used to implement the random allocation sequence (such as sequentially numbered containers), describing any steps taken to conceal the sequence until interventions were assigned | N/A                 |

|                                                          |                                                      |     |                                                                                                                                                                                       |                                                                        |
|----------------------------------------------------------|------------------------------------------------------|-----|---------------------------------------------------------------------------------------------------------------------------------------------------------------------------------------|------------------------------------------------------------------------|
| 1<br>2<br>3<br>4<br>5<br>6<br>7                          | Implementation                                       | 10  | Who generated the random allocation sequence, who enrolled participants, and who assigned participants to interventions                                                               | N/A                                                                    |
| 8                                                        | Blinding                                             | 11a | If done, who was blinded after assignment to interventions (for example, participants, care providers, those assessing outcomes) and how                                              | N/A                                                                    |
| 9                                                        |                                                      | 11b | If relevant, description of the similarity of interventions                                                                                                                           | N/A                                                                    |
| 10                                                       | Statistical methods                                  | 12  | Methods used to address each pilot trial objective whether qualitative or quantitative                                                                                                | 12, 14,                                                                |
| 11                                                       | <b>Results</b>                                       |     |                                                                                                                                                                                       |                                                                        |
| 12<br>13<br>14<br>15<br>16<br>17<br>18<br>19<br>20       | Participant flow (a diagram is strongly recommended) | 13a | For each group, the numbers of participants who were approached and/or assessed for eligibility, randomly assigned, received intended treatment, and were assessed for each objective | Suppl flowchart 1. Suppl table 1. Table 2, 3, on page 12               |
| 21                                                       |                                                      | 13b | For each group, losses and exclusions after randomisation, together with reasons                                                                                                      | 11, 12 acceptability and feasibility data                              |
| 22<br>23<br>24<br>25<br>26                               | Recruitment                                          | 14a | Dates defining the periods of recruitment and follow-up                                                                                                                               | 9, 10                                                                  |
| 27                                                       |                                                      | 14b | Why the pilot trial ended or was stopped                                                                                                                                              | 11, Phase 2 – Evaluation/Acceptability of intervention                 |
| 28<br>29<br>30<br>31<br>32                               | Baseline data                                        | 15  | A table showing baseline demographic and clinical characteristics for each group                                                                                                      | Phase 1 – Suppl table 1. Phase 2 – Page 12, table 3                    |
| 33<br>34<br>35<br>36<br>37<br>38<br>39<br>40<br>41<br>42 | Numbers analysed                                     | 16  | For each objective, number of participants (denominator) included in each analysis. If relevant, these numbers should be by randomised group                                          | Primary outcome: 12, Under 'Acceptability/feasibility data.' Secondary |

1  
2  
3  
4  
5  
6  
7  
8  
9  
10  
11  
12  
13  
14  
15  
16  
17  
18  
19  
20  
21  
22  
23  
24  
25  
26  
27  
28  
29  
30  
31  
32  
33  
34  
35  
36  
37  
38  
39  
40  
41  
42  
43  
44  
45  
46

|                          |     |                                                                                                                                                                                |                                                                                               |
|--------------------------|-----|--------------------------------------------------------------------------------------------------------------------------------------------------------------------------------|-----------------------------------------------------------------------------------------------|
|                          |     |                                                                                                                                                                                | outcome: 11, under heading 'Participants', and 13-14, under heading 'Descriptive Statistics.' |
| Outcomes and estimation  | 17  | For each objective, results including expressions of uncertainty (such as 95% confidence interval) for any estimates. If relevant, these results should be by randomised group | 13-13 under heading 'Descriptive Statistics.'                                                 |
| Ancillary analyses       | 18  | Results of any other analyses performed that could be used to inform the future definitive trial                                                                               | 12, Table 4: Reasons for not completing. Qualitative findings, 14 - 16.                       |
| Harms                    | 19  | All important harms or unintended effects in each group (for specific guidance see CONSORT for harms)                                                                          | 13, under heading 'Adverse Events.'                                                           |
|                          | 19a | If relevant, other important unintended consequences                                                                                                                           | N/A                                                                                           |
| <b>Discussion</b>        |     |                                                                                                                                                                                |                                                                                               |
| Limitations              | 20  | Pilot trial limitations, addressing sources of potential bias and remaining uncertainty about feasibility                                                                      | 18                                                                                            |
| Generalisability         | 21  | Generalisability (applicability) of pilot trial methods and findings to future definitive trial and other studies                                                              | 17                                                                                            |
| Interpretation           | 22  | Interpretation consistent with pilot trial objectives and findings, balancing potential benefits and harms, and considering other relevant evidence                            | 17                                                                                            |
|                          | 22a | Implications for progression from pilot to future definitive trial, including any proposed amendments                                                                          | 17, 18                                                                                        |
| <b>Other information</b> |     |                                                                                                                                                                                |                                                                                               |

|   |              |    |                                                                                            |     |
|---|--------------|----|--------------------------------------------------------------------------------------------|-----|
| 1 | Registration | 23 | Registration number for pilot trial and name of trial registry                             | N/A |
| 2 | Protocol     | 24 | Where the pilot trial protocol can be accessed, if available                               | N/A |
| 3 | Funding      | 25 | Sources of funding and other support (such as supply of drugs), role of funders            | 19  |
| 4 |              | 26 | Ethical approval or approval by research review committee, confirmed with reference number | 8   |

6  
7 Citation: Eldridge SM, Chan CL, Campbell MJ, Bond CM, Hopewell S, Thabane L, et al. CONSORT 2010 statement: extension to randomised pilot and feasibility trials. BMJ. 2016;355.

8 \*We strongly recommend reading this statement in conjunction with the CONSORT 2010, extension to randomised pilot and feasibility trials, Explanation and Elaboration for important  
9 clarifications on all the items. If relevant, we also recommend reading CONSORT extensions for cluster randomised trials, non-inferiority and equivalence trials, non-pharmacological  
10 treatments, herbal interventions, and pragmatic trials. Additional extensions are forthcoming: for those and for up to date references relevant to this checklist, see [www.consort-statement.org](http://www.consort-statement.org).  
11  
12  
13  
14  
15  
16  
17  
18  
19  
20  
21  
22  
23  
24  
25  
26  
27  
28  
29  
30  
31  
32  
33  
34  
35  
36  
37  
38  
39  
40  
41  
42
