# Supplementary material for: SafeSpace: what is the feasibility and acceptability of a codesigned virtual reality intervention, incorporating compassionate mind training, to support people undergoing cancer treatment in a clinical setting?
Source: HighWire-hosted journal article supplement (doi:10.1136/bmjopen-2020-047626), 2022-02-01

**Supplementary flowchart 2 – Data triangulation**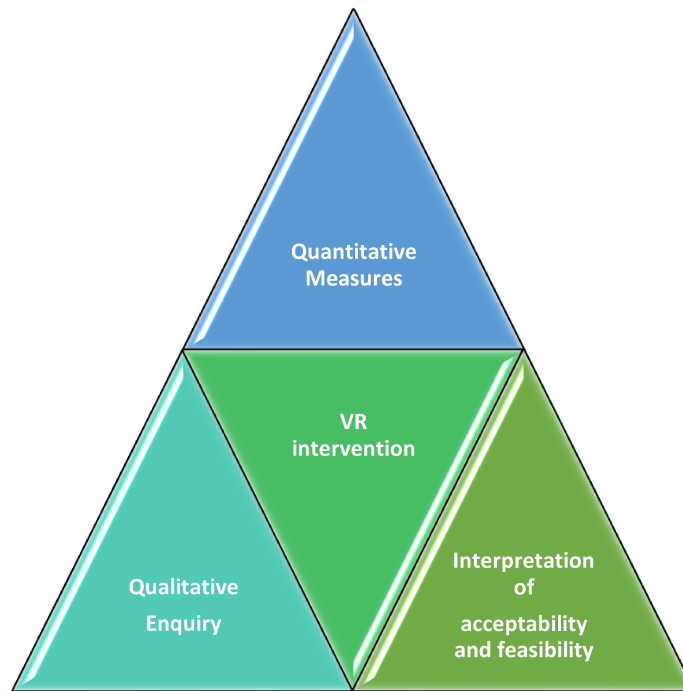

Supplement: bmjopen-2020-047626supp002_data_supplement.pdf [file bmjopen-2020-047626supp002_data_supplement.pdf]
