# Supplementary figures and images for: SafeSpace: what is the feasibility and acceptability of a codesigned virtual reality intervention, incorporating compassionate mind training, to support people undergoing cancer treatment in a clinical setting?
Source: PubMed Central journal article supplement — BMJ Open. 2022 Feb 10;12(2):e047626. doi: 10.1136/bmjopen-2020-047626 (PMC8845220; doi:10.1136/bmjopen-2020-047626), 2022-02-10

## STUDY SET-UP – Supplementary flowchart 1

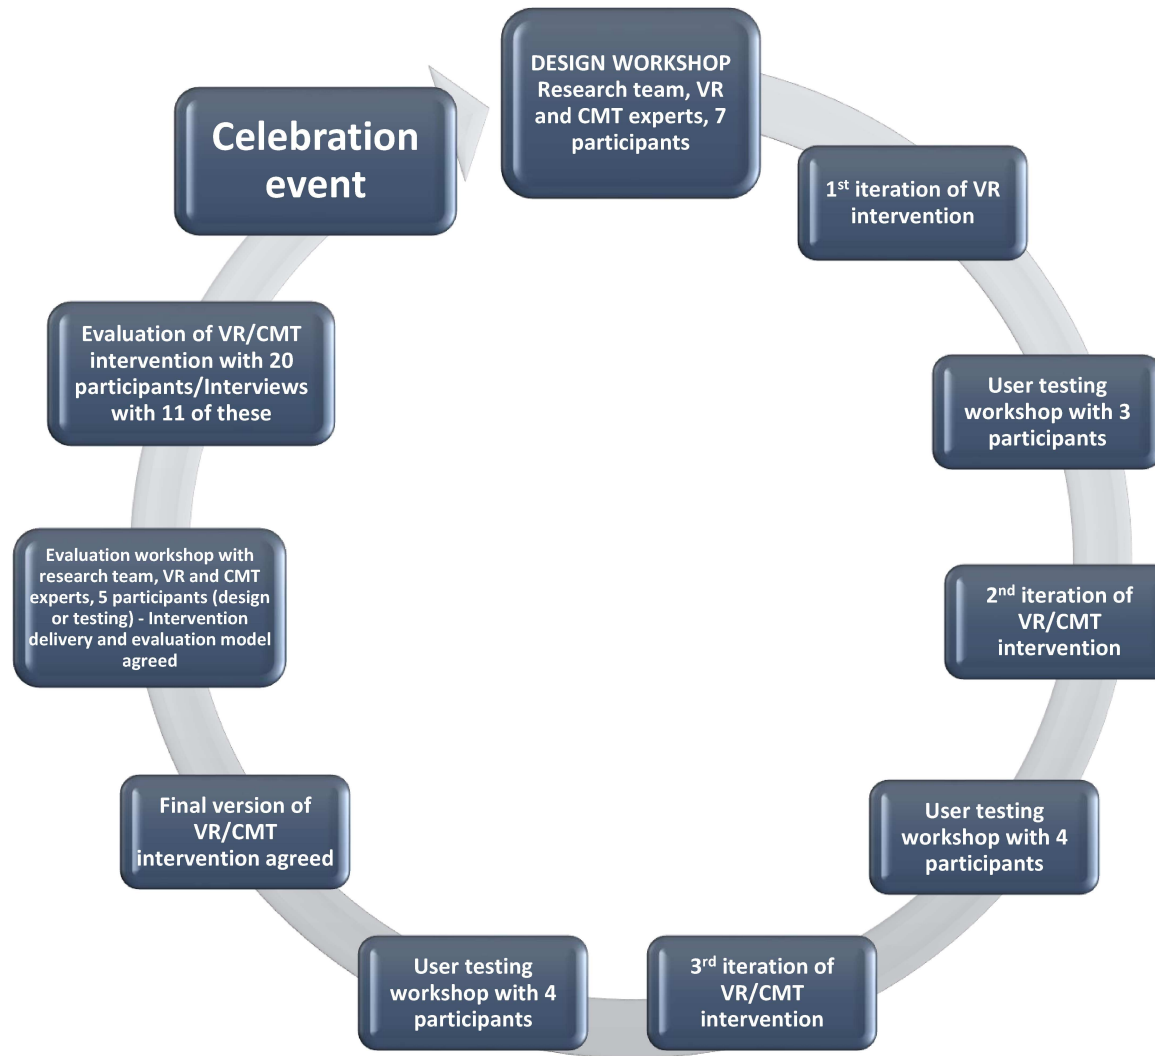

Supplement: bmjopen-2020-047626supp001.pdf [file bmjopen-2020-047626supp001.pdf]
